# Supplementary material for: A Multiomics Profile of Coordinated Defense and Key Candidate Genes against Bacterial Wilt in Tobacco
Source: Research Square preprint supplement (doi:10.21203/rs.3.rs-7864793/v1), 2025-11-17
Supplement: Supplementary file 1 [file 45bcf5b02a162a145a1c65a5.xlsx]

## Sheet:  Supplementary Table 1
Supplementary Table 1 Transcriptome Analysis Data Quality Summary Table
sample	library	raw_reads	raw_bases	clean_reads	clean_bases	error_rate	Q20	Q30	GC_pct
HDZ_1	FRAS250288173-1r	46933138	7.04G	46387212	6.96G	0.01	99.41	97.47	41.73
HDZ_2	FRAS250288174-1r	47711116	7.16G	47279110	7.09G	0.01	99.34	97.28	42.69
HDZ_3	FRAS250288175-1r	47058754	7.06G	46475228	6.97G	0.01	99.39	97.42	42.22
HDB_1	FRAS250288176-1r	43531364	6.53G	42989204	6.45G	0.01	99.37	97.33	42.21
HDB_2	FRAS250288177-1r	44131782	6.62G	43565196	6.53G	0.01	99.28	96.78	43.73
HDB_3	FRAS250288178-1r	45676046	6.85G	45146756	6.77G	0.01	99.36	97.29	42.92
YYZ_1	FRAS250288179-1r	43770746	6.57G	43317704	6.5G	0.01	99.37	97.25	42.56
YYZ_2	FRAS250288180-1r	55297284	8.29G	54787254	8.22G	0.01	99.37	97.29	42.54
YYZ_3	FRAS250288181-1r	58502778	8.78G	58021586	8.7G	0.01	99.44	97.63	42.34
YYB_1	FRAS250288182-1r	50478962	7.57G	50026812	7.5G	0.01	99.45	97.68	42.36
YYB_2	FRAS250288183-1r	57844854	8.68G	57056762	8.56G	0.01	99.38	97.33	42.49
YYB_3	FRAS250288184-1r	46630572	6.99G	46180774	6.93G	0.01	99.4	97.42	42.37

## Sheet:  Supplementary Table 2
Supplementary Table 2 WGCNA Analysis of Gene Connectivity
gene_id	kTotal	kWithin	kOut	kDiff	module
novel.2455	6105.13	3869.31	2235.83	1633.48	blue
novel.4805	6106.36	3869.29	2237.06	1632.23	blue
novel.734	6151.25	3869.29	2281.96	1587.33	blue
Nta07g01530	6131.23	3868.87	2262.36	1606.51	blue
Nta24g07630	6154.93	3868.86	2286.07	1582.79	blue
Nta01g01880	6093.45	3868.82	2224.63	1644.19	blue
Nta03g30650	6122.05	3868.82	2253.23	1615.6	blue
Nta22g14200	6168.3	3868.79	2299.5	1569.29	blue
Nta04g14010	6097.7	3868.75	2228.95	1639.8	blue
novel.3108	6131.5	3868.51	2262.99	1605.52	blue
novel.3260	6145.77	3868.5	2277.27	1591.24	blue
Nta03g06450	6090.57	3868.49	2222.07	1646.42	blue
novel.3239	6100.01	3868.21	2231.8	1636.42	blue
Nta06g26470	6185.54	3868.17	2317.37	1550.81	blue
Nta10g17780	6071.52	3867.79	2203.72	1664.07	blue
Nta01g13440	6130.3	3867.77	2262.53	1605.24	blue
Nta14g18760	6070.75	3867.7	2203.04	1664.66	blue
novel.2062	6068.59	3867.57	2201.03	1666.54	blue
Nta24g21760	6072.21	3867.47	2204.73	1662.74	blue
Nta15g22740	6061.35	3866.99	2194.36	1672.63	blue
Nta04g19250	6073.3	3866.5	2206.8	1659.7	blue
Nta00g14210	6054.23	3866.48	2187.75	1678.73	blue
Nta02g19960	6195.97	3866.48	2329.49	1536.99	blue
Nta17g13330	6178.82	3866.43	2312.39	1554.04	blue
Nta22g14330	6209.81	3866.32	2343.48	1522.84	blue
Nta03g06170	6069.07	3866.22	2202.85	1663.37	blue
Nta06g14430	6185.65	3866.14	2319.5	1546.64	blue
Nta02g31440	6187.21	3865.98	2321.23	1544.75	blue
Nta24g06580	6202.3	3865.8	2336.5	1529.31	blue
Nta16g19130	6156.07	3865.78	2290.29	1575.49	blue
Nta15g26000	6130.68	3865.57	2265.11	1600.46	blue
Nta11g30220	6039.25	3865.2	2174.05	1691.16	blue
Nta01g11490	6221.64	3865.15	2356.49	1508.66	blue
Nta03g21710	6080.71	3865.11	2215.61	1649.5	blue
Nta08g19500	6056.49	3864.32	2192.17	1672.15	blue
Nta07g15560	6027.24	3863.93	2163.3	1700.63	blue
Nta06g10010	6220.65	3863.73	2356.92	1506.81	blue
Nta01g19420	6157.76	3863.68	2294.08	1569.6	blue
novel.3165	6021.48	3863.43	2158.05	1705.38	blue
Nta05g16190	6025.68	3863.25	2162.42	1700.83	blue
Nta23g11850	6193.6	3862.64	2330.96	1531.67	blue
Nta19g22930	6016.01	3862.6	2153.42	1709.18	blue
Nta04g11520	6128.34	3862.09	2266.24	1595.85	blue
Nta19g05390	6175.21	3862.01	2313.2	1548.81	blue
Nta20g06640	6006.78	3861.72	2145.05	1716.67	blue
Nta16g10940	6013.55	3861.51	2152.04	1709.48	blue
Nta21g05180	6231.12	3860.94	2370.18	1490.76	blue
Nta18g08760	6244.99	3860.92	2384.07	1476.86	blue
Nta01g11840	6189.88	3860.87	2329.02	1531.85	blue
Nta09g05470	6251.24	3860.83	2390.41	1470.41	blue
Nta22g06970	6009.27	3860.77	2148.5	1712.27	blue
Nta10g11970	6246.81	3860.49	2386.32	1474.16	blue
Nta21g07270	6034.53	3860.46	2174.08	1686.38	blue
Nta05g00040	6169.83	3860.27	2309.57	1550.7	blue
Nta23g05390	6016.58	3860.17	2156.41	1703.76	blue
Nta05g28980	6063.23	3860.07	2203.15	1656.92	blue
Nta04g28640	5995.93	3859.98	2135.95	1724.03	blue
Nta12g04650	6127.69	3859.96	2267.74	1592.22	blue
novel.7592	6237.91	3859.51	2378.4	1481.11	blue
novel.3035	5989.11	3858.96	2130.16	1728.8	blue
novel.7582	6192.35	3858.95	2333.4	1525.55	blue
Nta01g12390	6271.13	3858.32	2412.81	1445.51	blue
Nta04g06490	6270.45	3858.25	2412.19	1446.06	blue
Nta19g23010	6115.11	3858.17	2256.94	1601.24	blue
Nta04g17150	6111.34	3857.76	2253.58	1604.18	blue
Nta18g05620	6154.25	3857.34	2296.91	1560.42	blue
Nta04g29230	6271.76	3856.27	2415.49	1440.78	blue
Nta06g13950	6179.85	3855.65	2324.2	1531.45	blue
Nta05g01130	6187.9	3855.55	2332.35	1523.21	blue
Nta04g28220	6009.9	3855.48	2154.43	1701.05	blue
Nta15g04400	6031.73	3855.22	2176.51	1678.7	blue
Nta10g07640	5974.71	3855.09	2119.62	1735.47	blue
Nta15g04830	5970.74	3855.04	2115.7	1739.34	blue
Nta10g11710	6006.57	3854.98	2151.58	1703.4	blue
Nta13g03460	5967.77	3854.3	2113.46	1740.84	blue
Nta02g08760	6182.68	3854.27	2328.41	1525.87	blue
Nta08g07380	6293.28	3853.95	2439.33	1414.62	blue
novel.3734	6281.88	3853.92	2427.96	1425.96	blue
Nta19g06830	6245.31	3853.9	2391.41	1462.48	blue
Nta09g15850	6256.64	3853.53	2403.11	1450.42	blue
Nta07g21520	5956.32	3852.72	2103.6	1749.12	blue
Nta04g07130	6213.19	3852.62	2360.57	1492.05	blue
Nta12g12610	6260.21	3852.53	2407.68	1444.85	blue
Nta01g02590	5940.58	3851.77	2088.81	1762.96	blue
novel.2063	6230.86	3851.74	2379.12	1472.62	blue
Nta03g16770	6269.2	3851.31	2417.89	1433.42	blue
novel.5315	6282.66	3850.58	2432.08	1418.5	blue
Nta10g12810	6093.9	3850.36	2243.55	1606.81	blue
Nta07g03120	5982.7	3849.96	2132.75	1717.21	blue
Nta05g16550	6134.68	3849.62	2285.06	1564.55	blue
Nta01g19240	5969.12	3849.38	2119.74	1729.63	blue
Nta20g19290	5988.96	3849.36	2139.6	1709.76	blue
Nta01g19700	6029.6	3849.3	2180.3	1669	blue
Nta09g07950	6065.07	3849.26	2215.81	1633.46	blue
Nta14g07170	6313.93	3848.93	2465	1383.93	blue
Nta02g09100	5938.11	3848.76	2089.35	1759.42	blue
Nta18g01960	6296.67	3848.42	2448.25	1400.17	blue
Nta14g08460	6255.73	3848.35	2407.37	1440.98	blue
novel.3738	5983.51	3848.17	2135.33	1712.84	blue
Nta14g17800	6269.72	3848.01	2421.71	1426.3	blue
Nta11g20390	6320.31	3848	2472.3	1375.7	blue
Nta04g08450	6156.72	3847.75	2308.97	1538.77	blue
novel.6741	5952.77	3847.41	2105.36	1742.04	blue
novel.1918	6013	3846.75	2166.25	1680.5	blue
Nta24g10350	6210.79	3846.6	2364.19	1482.41	blue
Nta15g23630	6011.05	3846.53	2164.52	1682	blue
Nta23g03940	6179.52	3846.47	2333.05	1513.42	blue
Nta17g19070	6189.64	3845.92	2343.72	1502.2	blue
Nta12g24030	6161.94	3845.43	2316.51	1528.92	blue
Nta12g12880	5954.44	3845.29	2109.16	1736.13	blue
Nta23g02940	6329.47	3845.18	2484.29	1360.89	blue
Nta03g04780	6224.05	3844.86	2379.19	1465.67	blue
Nta06g02440	5910.28	3844.63	2065.65	1778.98	blue
Nta12g09470	5958.91	3844.61	2114.3	1730.32	blue
Nta13g19930	6131.89	3844.58	2287.3	1557.28	blue
Nta22g12070	5904.71	3843.17	2061.54	1781.63	blue
novel.3525	6327.79	3842.85	2484.94	1357.91	blue
Nta16g11900	6081.75	3842.5	2239.24	1603.26	blue
Nta06g13370	6329.67	3841.61	2488.06	1353.54	blue
Nta10g00640	5902.6	3841.49	2061.11	1780.38	blue
Nta03g33840	6345.09	3841.37	2503.72	1337.66	blue
novel.7414	6307.73	3840.65	2467.08	1373.58	blue
Nta04g00710	6005.2	3839.82	2165.38	1674.44	blue
Nta02g10690	6329.11	3839.4	2489.71	1349.69	blue
Nta05g15070	6326.11	3839.39	2486.72	1352.67	blue
Nta01g23130	6291.04	3839.05	2451.99	1387.05	blue
novel.37	5877.37	3838.9	2038.46	1800.44	blue
Nta22g04700	6317.2	3838.6	2478.6	1360	blue
Nta15g06910	6216.06	3837.9	2378.16	1459.74	blue
Nta10g17680	5878.75	3837.65	2041.1	1796.56	blue
Nta03g09520	6292.84	3837.62	2455.22	1382.4	blue
Nta06g23470	5878.05	3837.53	2040.52	1797.01	blue
Nta00g08330	6165.99	3837.41	2328.58	1508.82	blue
Nta04g14610	6280.99	3837.2	2443.78	1393.42	blue
Nta13g14290	6358.8	3837.17	2521.63	1315.54	blue
Nta03g20990	6250.82	3836.76	2414.05	1422.71	blue
Nta20g00120	6125.85	3836.33	2289.52	1546.82	blue
Nta07g12860	6182.21	3836.23	2345.98	1490.25	blue
Nta12g00370	6284.78	3836.22	2448.57	1387.65	blue
Nta11g27410	5865.19	3835.88	2029.31	1806.57	blue
Nta10g07280	6350.82	3835.61	2515.2	1320.41	blue
Nta18g22720	6141.09	3835.54	2305.55	1530	blue
Nta11g06540	5975.49	3835.51	2139.98	1695.53	blue
Nta01g03890	6058.01	3835.38	2222.63	1612.75	blue
Nta01g16010	6021.51	3835.19	2186.32	1648.88	blue
Nta05g08270	5887.94	3835.09	2052.85	1782.24	blue
Nta01g28880	6240.39	3835.01	2405.38	1429.64	blue
Nta02g03190	5861.4	3834.84	2026.56	1808.28	blue
Nta18g00020	5893.98	3834.5	2059.48	1775.02	blue
Nta06g12400	6365.41	3834.05	2531.36	1302.68	blue
Nta00g17610	5952.9	3833.76	2119.14	1714.62	blue
Nta12g33500	6163.49	3833.64	2329.84	1503.8	blue
Nta05g16440	5911.9	3832.48	2079.42	1753.06	blue
Nta02g27050	6242.21	3832.07	2410.14	1421.93	blue
Nta04g08500	5990.11	3831.88	2158.23	1673.65	blue
novel.4267	6368.15	3831.61	2536.54	1295.07	blue
Nta04g07000	5920.25	3831.37	2088.88	1742.49	blue
Nta13g09570	6235.12	3831.27	2403.85	1427.42	blue
Nta20g00070	6025.21	3829.8	2195.4	1634.4	blue
Nta07g11750	6063.77	3829.8	2233.97	1595.83	blue
Nta16g20060	6341.95	3829.77	2512.18	1317.59	blue
Nta16g23010	6331.48	3829.55	2501.93	1327.62	blue
Nta02g12930	6350.06	3829.54	2520.52	1309.02	blue
Nta04g05900	6233.96	3829.44	2404.52	1424.92	blue
novel.3188	5956.31	3829.17	2127.14	1702.03	blue
Nta07g15110	6384.07	3828.73	2555.34	1273.38	blue
Nta11g24780	5858.22	3828.43	2029.79	1798.63	blue
Nta02g10300	5843.51	3828.39	2015.12	1813.28	blue
Nta04g19590	5879.57	3828.28	2051.29	1777	blue
Nta07g21900	6357.38	3828.21	2529.17	1299.04	blue
Nta02g32820	6214.37	3828.06	2386.31	1441.74	blue
Nta19g08270	5919.59	3828.04	2091.56	1736.48	blue
Nta20g10100	6361.5	3827.9	2533.61	1294.29	blue
Nta00g04690	5902.75	3827.87	2074.88	1752.99	blue
novel.1970	6195.98	3827.47	2368.5	1458.97	blue
novel.2349	6247.34	3826.91	2420.43	1406.48	blue
Nta24g21430	5829.79	3825.36	2004.43	1820.93	blue
Nta22g09530	5851.05	3825.33	2025.73	1799.6	blue
Nta12g32910	6225.86	3825.31	2400.55	1424.77	blue
novel.3815	6348.1	3825	2523.11	1301.89	blue
Nta16g11710	5878.33	3824.7	2053.63	1771.07	blue
Nta02g12560	6292.11	3824.67	2467.44	1357.22	blue
Nta12g05130	5988.59	3824.65	2163.94	1660.71	blue
Nta01g22820	6023.8	3824.39	2199.41	1624.99	blue
Nta19g21990	6197.72	3824.28	2373.44	1450.84	blue
Nta05g02540	5991.79	3823.28	2168.5	1654.78	blue
Nta12g33070	6364.62	3821.89	2542.73	1279.15	blue
Nta19g05160	6339.43	3821.53	2517.9	1303.63	blue
Nta14g09930	5916.54	3821.21	2095.34	1725.87	blue
Nta11g23770	6362.88	3821.13	2541.75	1279.38	blue
Nta03g23530	6178.28	3820.74	2357.53	1463.21	blue
Nta05g13530	6221.37	3820.05	2401.33	1418.72	blue
Nta21g10310	6210.25	3819.96	2390.28	1429.68	blue
Nta15g27370	5851.89	3819.41	2032.47	1786.94	blue
Nta11g20770	6297.94	3819.28	2478.66	1340.61	blue
Nta15g14290	6154.95	3818.81	2336.15	1482.66	blue
Nta20g08590	6250.34	3818	2432.34	1385.66	blue
novel.7603	6264.18	3817.79	2446.39	1371.4	blue
Nta21g14370	5922.01	3817.78	2104.23	1713.55	blue
novel.5425	6329.44	3817.67	2511.77	1305.9	blue
Nta16g02320	6412.59	3817.24	2595.35	1221.89	blue
Nta22g10460	6245.82	3817.05	2428.77	1388.28	blue
novel.6629	5919.7	3816.91	2102.79	1714.12	blue
Nta07g16580	6237.32	3816.75	2420.57	1396.17	blue
novel.502	5921.22	3816.68	2104.54	1712.14	blue
Nta16g01050	5814.41	3816.3	1998.12	1818.18	blue
Nta03g08820	6379.21	3815.75	2563.47	1252.28	blue
Nta15g10020	6369.94	3815.71	2554.23	1261.48	blue
Nta11g01050	6380.03	3815.01	2565.02	1249.99	blue
Nta06g14660	5946.99	3814.52	2132.47	1682.05	blue
Nta20g06090	6408.21	3814.03	2594.18	1219.85	blue
novel.2667	6030.85	3813.65	2217.19	1596.46	blue
novel.6016	6348.38	3813.6	2534.77	1278.83	blue
Nta03g15230	6286.23	3813.44	2472.79	1340.66	blue
Nta01g01920	5864.78	3813.26	2051.51	1761.75	blue
Nta19g06570	6415.4	3812.67	2602.73	1209.95	blue
Nta02g02590	5848.07	3812.62	2035.46	1777.16	blue
novel.3059	6389.53	3812.58	2576.95	1235.63	blue
Nta05g22430	6388.86	3812.39	2576.47	1235.92	blue
Nta06g06620	6404.6	3812.06	2592.54	1219.52	blue
novel.3012	5884.74	3811.91	2072.83	1739.08	blue
Nta09g05800	5787.91	3811.67	1976.25	1835.42	blue
Nta12g21560	5770.26	3811.07	1959.19	1851.88	blue
Nta08g02890	6112.78	3810.99	2301.79	1509.21	blue
novel.1425	6373.08	3810.57	2562.5	1248.07	blue
Nta02g16810	6421.96	3810.51	2611.45	1199.07	blue
Nta04g14160	5851.26	3810.35	2040.91	1769.44	blue
novel.5558	5835.67	3810.01	2025.67	1784.34	blue
Nta01g17490	6192.99	3809.94	2383.05	1426.89	blue
Nta14g17610	6177.08	3809.8	2367.28	1442.51	blue
Nta04g26300	6111.5	3809.75	2301.76	1507.99	blue
Nta11g07370	6006.44	3809.65	2196.79	1612.87	blue
Nta21g04320	5957.44	3809.62	2147.82	1661.79	blue
Nta10g18060	5780.19	3809.55	1970.64	1838.91	blue
Nta10g09130	6135.38	3809.51	2325.87	1483.65	blue
novel.1625	5774.57	3809.27	1965.3	1843.97	blue
Nta07g18750	6415.81	3809.25	2606.56	1202.69	blue
Nta07g10540	6424.99	3809.24	2615.76	1193.48	blue
Nta11g02020	6430.88	3808.94	2621.95	1186.99	blue
Nta24g21700	5815.32	3808.44	2006.88	1801.57	blue
Nta00g16500	6423.95	3808.34	2615.6	1192.74	blue
Nta01g02980	6033.73	3807.96	2225.77	1582.19	blue
novel.2245	5791.17	3807.95	1983.22	1824.73	blue
Nta00g14170	6415.62	3807.37	2608.25	1199.12	blue
novel.1848	6427.24	3806.88	2620.36	1186.52	blue
Nta04g02050	6363.94	3806.67	2557.27	1249.4	blue
Nta24g13990	6169.8	3805.86	2363.94	1441.92	blue
novel.1485	5942.25	3805.79	2136.47	1669.32	blue
novel.3771	6213.48	3805.73	2407.75	1397.97	blue
Nta10g11200	6340.28	3805.37	2534.91	1270.46	blue
Nta01g19990	6276.73	3805.04	2471.69	1333.35	blue
Nta16g22240	6441.63	3804.92	2636.71	1168.21	blue
Nta20g05820	6386.59	3804.17	2582.42	1221.75	blue
Nta15g12640	6326.8	3804.06	2522.74	1281.32	blue
Nta02g19510	6156.66	3804.05	2352.61	1451.45	blue
novel.3151	6332.47	3803.98	2528.49	1275.48	blue
Nta18g12620	5747.16	3803.89	1943.27	1860.61	blue
Nta11g30190	5923.21	3803.84	2119.37	1684.47	blue
Nta00g00570	6022.87	3803.69	2219.18	1584.51	blue
Nta01g07310	6030.98	3803.59	2227.39	1576.2	blue
Nta18g14360	6017.24	3803.41	2213.82	1589.59	blue
Nta06g14950	5849.78	3802.6	2047.18	1755.42	blue
Nta13g15950	6210.79	3802.16	2408.63	1393.52	blue
Nta03g01760	6352.4	3801.94	2550.47	1251.47	blue
Nta13g10030	5741.02	3801.82	1939.2	1862.62	blue
Nta17g10830	6273.86	3801.49	2472.36	1329.13	blue
Nta16g19160	6444.81	3801.26	2643.56	1157.7	blue
Nta19g17160	6409.72	3801.23	2608.49	1192.74	blue
Nta16g25320	6444.52	3801.05	2643.47	1157.57	blue
Nta06g06640	5808.48	3800.72	2007.76	1792.96	blue
novel.5968	5899.82	3800.61	2099.21	1701.4	blue
Nta07g16010	5950.71	3800.23	2150.47	1649.76	blue
Nta14g16110	6359.85	3800.11	2559.75	1240.36	blue
Nta03g22090	6422.77	3800.1	2622.67	1177.43	blue
Nta06g18000	6371.29	3800.06	2571.23	1228.83	blue
Nta16g21810	5805.35	3800.05	2005.29	1794.76	blue
Nta16g24560	6405.89	3799.61	2606.27	1193.34	blue
Nta02g25740	6123.54	3799.34	2324.2	1475.15	blue
Nta16g05180	6250.98	3799.21	2451.77	1347.44	blue
Nta06g15810	6041.12	3799.08	2242.04	1557.03	blue
Nta18g10600	6422.37	3799.03	2623.33	1175.7	blue
novel.1730	6434.85	3798.65	2636.2	1162.45	blue
Nta11g13540	6361.22	3798.52	2562.7	1235.81	blue
Nta01g20670	6440.84	3798.45	2642.39	1156.06	blue
Nta10g15810	6335.61	3798.29	2537.32	1260.96	blue
Nta15g25090	5795.32	3798.26	1997.06	1801.2	blue
Nta07g20640	6442.95	3798.15	2644.81	1153.34	blue
Nta02g16900	6314.46	3796.84	2517.61	1279.23	blue
Nta05g18450	5825.41	3796.81	2028.6	1768.21	blue
Nta02g19100	5725.5	3796.55	1928.95	1867.6	blue
Nta21g07870	6289.85	3795.95	2493.91	1302.04	blue
Nta15g16550	6241.44	3795.8	2445.64	1350.17	blue
Nta18g13980	6234.31	3795.61	2438.7	1356.91	blue
Nta12g28570	6456.38	3794.88	2661.5	1133.38	blue
novel.5071	6036.89	3794.72	2242.17	1552.55	blue
novel.7316	6450.73	3794.51	2656.22	1138.3	blue
Nta20g18340	5961.15	3794.25	2166.91	1627.34	blue
Nta22g14410	6463.48	3794	2669.49	1124.51	blue
novel.1875	6047.14	3793.74	2253.4	1540.35	blue
Nta19g06050	6408.42	3793.73	2614.69	1179.04	blue
Nta11g31390	5726.06	3793.71	1932.34	1861.37	blue
Nta11g07720	5783.39	3792.39	1991	1801.39	blue
novel.6337	5837.22	3792.24	2044.98	1747.26	blue
Nta14g11920	5856.39	3792.22	2064.17	1728.05	blue
Nta12g18260	5919.08	3791.57	2127.51	1664.06	blue
novel.7383	5904.62	3789.77	2114.85	1674.92	blue
Nta11g01020	6166.48	3789.64	2376.84	1412.8	blue
novel.2009	6202.74	3789.61	2413.13	1376.48	blue
Nta16g05390	5999.7	3788.99	2210.71	1578.28	blue
Nta14g10840	5806.68	3788.59	2018.08	1770.51	blue
novel.1487	6306.08	3788.47	2517.61	1270.86	blue
Nta06g25110	5813.45	3788.33	2025.12	1763.22	blue
Nta06g29760	5709.21	3788.05	1921.16	1866.88	blue
Nta20g13100	6207.57	3788.01	2419.55	1368.46	blue
novel.6607	6200.27	3787.97	2412.29	1375.68	blue
Nta22g10550	6296.75	3787.95	2508.8	1279.15	blue
Nta03g11660	6403.97	3787.93	2616.04	1171.89	blue
Nta15g20300	5751.15	3787.34	1963.81	1823.53	blue
Nta21g07410	5985.06	3787.32	2197.74	1589.58	blue
Nta05g18760	5698.94	3787.17	1911.76	1875.41	blue
Nta00g12580	5819.5	3786.83	2032.67	1754.15	blue
Nta16g02350	6322.75	3785.81	2536.93	1248.88	blue
Nta13g22660	6247.11	3785.37	2461.74	1323.63	blue
Nta21g03330	5771.1	3785.09	1986.01	1799.08	blue
Nta22g00570	5883.66	3784.84	2098.82	1686.02	blue
Nta06g29400	6424.71	3784.79	2639.93	1144.86	blue
novel.5318	5704.74	3784.31	1920.44	1863.87	blue
Nta04g33430	5717.23	3784.21	1933.02	1851.19	blue
Nta23g13220	5831.84	3784.09	2047.76	1736.33	blue
Nta09g22380	6044.71	3784.09	2260.63	1523.46	blue
Nta06g26180	6010.35	3784.06	2226.29	1557.77	blue
Nta03g27440	6262.94	3783.75	2479.19	1304.56	blue
novel.714	6476.26	3783.52	2692.74	1090.78	blue
Nta13g20940	5969	3783.28	2185.73	1597.55	blue
novel.2478	6427.65	3783.12	2644.53	1138.6	blue
Nta20g00400	5752.79	3782.64	1970.15	1812.48	blue
Nta03g33640	5796.02	3782.58	2013.44	1769.14	blue
Nta10g03720	6238.51	3782.47	2456.04	1326.42	blue
Nta11g30230	5781.85	3782.14	1999.71	1782.43	blue
Nta23g00900	6278.11	3782.03	2496.08	1285.96	blue
novel.6355	6135.55	3781.92	2353.64	1428.28	blue
novel.2372	5720.27	3781.55	1938.72	1842.84	blue
Nta21g14790	6382.48	3781.55	2600.93	1180.62	blue
Nta23g12960	6423.88	3781.45	2642.43	1139.02	blue
Nta16g10280	5753.84	3781.25	1972.58	1808.67	blue
novel.1809	6073.97	3781.25	2292.72	1488.53	blue
Nta12g01350	5773.51	3781.04	1992.48	1788.56	blue
novel.6925	6487.18	3780.93	2706.25	1074.69	blue
Nta15g11260	5955.4	3780.64	2174.76	1605.88	blue
Nta12g19520	5741.83	3780.52	1961.3	1819.22	blue
Nta01g00200	5985.65	3780.31	2205.34	1574.97	blue
Nta19g02960	5802.01	3779.29	2022.72	1756.58	blue
Nta23g09620	6230.02	3779.24	2450.77	1328.47	blue
Nta12g01330	6176.89	3779.18	2397.7	1381.48	blue
Nta09g07520	5769.19	3779.1	1990.09	1789.02	blue
Nta21g03250	6234.83	3779.08	2455.75	1323.33	blue
novel.5422	6141.21	3778.71	2362.51	1416.2	blue
Nta04g15410	6005.46	3778.4	2227.06	1551.35	blue
novel.6958	6266.16	3778.06	2488.1	1289.96	blue
Nta08g14150	5812.7	3777.89	2034.81	1743.08	blue
Nta17g06180	6009.15	3777.68	2231.47	1546.21	blue
Nta18g10820	6244.31	3777.61	2466.7	1310.92	blue
Nta03g05640	6198.6	3777.54	2421.05	1356.49	blue
novel.4843	6375.4	3777.22	2598.18	1179.04	blue
Nta05g18790	6425.61	3777.15	2648.46	1128.69	blue
Nta21g04720	5776.64	3777.05	1999.59	1777.47	blue
Nta02g31570	6030.94	3776.65	2254.29	1522.36	blue
novel.2237	6265.34	3776.07	2489.27	1286.81	blue
Nta12g09060	5998.54	3775.73	2222.82	1552.91	blue
Nta22g16350	5774.85	3775.59	1999.27	1776.32	blue
novel.186	6006.25	3775.36	2230.89	1544.46	blue
Nta07g11100	6484.57	3774.64	2709.92	1064.72	blue
Nta04g16390	6190.9	3774.58	2416.32	1358.26	blue
Nta16g21930	5659.36	3774.54	1884.82	1889.72	blue
Nta21g15450	5761.9	3774.38	1987.52	1786.85	blue
Nta14g19370	5713.72	3774.08	1939.64	1834.44	blue
Nta20g04460	5855.64	3774.01	2081.64	1692.37	blue
Nta03g10740	6180.53	3773.93	2406.6	1367.34	blue
novel.7401	5780.68	3773.8	2006.88	1766.91	blue
Nta09g20550	6062.35	3772.88	2289.47	1483.41	blue
Nta23g14020	6496.21	3772.66	2723.55	1049.12	blue
Nta00g11970	6011.55	3772.56	2238.99	1533.56	blue
Nta05g16920	5911.42	3772.44	2138.98	1633.46	blue
Nta11g30200	5746.8	3772.43	1974.37	1798.06	blue
Nta04g16170	5662.27	3772.42	1889.85	1882.58	blue
Nta16g15440	6333.04	3772.4	2560.64	1211.75	blue
Nta08g01740	5920.11	3772.17	2147.94	1624.23	blue
Nta00g02650	5652.77	3771.28	1881.48	1889.8	blue
Nta20g14040	5715.03	3771.27	1943.76	1827.51	blue
novel.6329	5702.43	3770.98	1931.45	1839.54	blue
novel.5529	5965.98	3770.91	2195.07	1575.85	blue
Nta14g07960	6196.92	3770.67	2426.26	1344.41	blue
Nta06g17130	5846.31	3770.65	2075.67	1694.98	blue
Nta17g09350	5651.78	3770.42	1881.36	1889.06	blue
Nta17g20760	5970.28	3770.32	2199.96	1570.36	blue
Nta06g29100	5948.23	3770.17	2178.07	1592.1	blue
Nta04g10080	6326.38	3769.81	2556.56	1213.25	blue
Nta21g11490	6502.49	3769.79	2732.7	1037.09	blue
Nta01g20620	6298.63	3769.69	2528.93	1240.76	blue
Nta12g24080	6018.5	3769.56	2248.94	1520.62	blue
Nta02g28600	6268.14	3769.51	2498.63	1270.88	blue
Nta06g26170	5669.77	3769.48	1900.29	1869.19	blue
Nta17g04170	6206.08	3768.94	2437.14	1331.8	blue
novel.2232	5763.27	3768.92	1994.35	1774.57	blue
Nta12g29090	6507.77	3768.4	2739.38	1029.02	blue
Nta04g13540	5701.74	3768.32	1933.43	1834.89	blue
Nta14g19390	6249.22	3768.18	2481.04	1287.14	blue
Nta12g29220	6068.9	3768.09	2300.81	1467.29	blue
Nta21g15270	5695.36	3768.04	1927.32	1840.72	blue
Nta13g22240	6296.91	3767.91	2529	1238.91	blue
novel.1321	6267.27	3766.45	2500.82	1265.63	blue
Nta02g14900	6333.09	3766.02	2567.07	1198.95	blue
Nta16g23570	6347.8	3765.08	2582.72	1182.36	blue
Nta03g03110	6187.74	3764.98	2422.77	1342.21	blue
novel.506	5705.18	3764.97	1940.21	1824.76	blue
Nta03g18460	5708.29	3764.96	1943.33	1821.63	blue
Nta08g19860	6333.4	3764.57	2568.83	1195.73	blue
Nta12g26550	5663.07	3764.41	1898.66	1865.75	blue
Nta24g12040	6349.08	3764.15	2584.93	1179.23	blue
Nta11g29860	6511.64	3763.87	2747.76	1016.11	blue
Nta12g05980	6339.53	3763.82	2575.71	1188.11	blue
Nta20g02310	5805.33	3763.69	2041.64	1722.05	blue
Nta16g15720	6165.32	3763.28	2402.04	1361.23	blue
novel.4711	5731.48	3762.47	1969.02	1793.45	blue
Nta21g00460	6444.54	3762.07	2682.47	1079.61	blue
Nta06g25670	5857.03	3761.5	2095.53	1665.97	blue
Nta06g08720	6120.06	3761.19	2358.87	1402.33	blue
Nta19g04910	6475.93	3761.07	2714.87	1046.2	blue
Nta07g04610	6058.08	3760.88	2297.2	1463.68	blue
Nta09g21840	6488.71	3760.84	2727.87	1032.97	blue
Nta04g22620	6335.55	3760.22	2575.33	1184.89	blue
novel.1860	5621.8	3759.82	1861.99	1897.83	blue
Nta11g06720	5812.41	3759.74	2052.67	1707.07	blue
Nta24g19540	5620.97	3759.7	1861.26	1898.44	blue
Nta18g14840	5619.11	3759.58	1859.53	1900.05	blue
Nta22g05440	6518.12	3759.39	2758.73	1000.67	blue
Nta12g12240	6521.85	3759.17	2762.67	996.5	blue
Nta04g15830	6382.97	3758.59	2624.37	1134.22	blue
Nta13g21360	6513.13	3758.26	2754.88	1003.38	blue
Nta04g13460	6483.6	3758.23	2725.37	1032.86	blue
Nta09g15750	5935.42	3758.2	2177.23	1580.97	blue
novel.3143	5653.7	3757.68	1896.02	1861.66	blue
novel.2997	6188.77	3757.43	2431.33	1326.1	blue
Nta02g34950	6450.14	3757.27	2692.87	1064.4	blue
Nta08g19710	5630.77	3757.11	1873.66	1883.45	blue
Nta19g04450	6470.12	3757.02	2713.1	1043.92	blue
Nta19g07090	5701.31	3755.27	1946.04	1809.24	blue
Nta16g22250	6517.17	3753.88	2763.29	990.596	blue
Nta19g18050	6232.1	3753.78	2478.33	1275.45	blue
Nta04g06150	6472.84	3753.55	2719.28	1034.27	blue
Nta22g15390	6430.61	3753.44	2677.17	1076.27	blue
Nta11g25750	5822.3	3753.33	2068.97	1684.36	blue
Nta18g12000	6514.01	3753	2761.01	991.984	blue
novel.7256	6378.58	3752.98	2625.6	1127.38	blue
Nta15g03760	5712.74	3752.53	1960.2	1792.33	blue
Nta19g18320	5608.29	3752.5	1855.8	1896.7	blue
Nta00g08500	6411.18	3752.44	2658.73	1093.71	blue
Nta11g16770	6519.47	3751.81	2767.65	984.162	blue
Nta02g04750	6524.57	3751.65	2772.92	978.735	blue
Nta02g11140	6491.07	3751.57	2739.5	1012.08	blue
Nta08g17800	6207.45	3751.51	2455.94	1295.58	blue
Nta14g08560	6131.91	3751.39	2380.52	1370.87	blue
novel.1075	5990.07	3751.31	2238.75	1512.56	blue
novel.2861	5596.89	3751.25	1845.64	1905.62	blue
Nta09g01960	6501.45	3751.02	2750.43	1000.59	blue
Nta16g09150	6170.89	3750.99	2419.9	1331.09	blue
Nta12g22110	5789.96	3750.68	2039.27	1711.41	blue
Nta22g17350	6470.33	3750.49	2719.84	1030.66	blue
Nta15g05910	6037.43	3750.31	2287.12	1463.19	blue
Nta15g15350	6229.22	3750.28	2478.93	1271.35	blue
Nta07g14220	5858.44	3750.24	2108.2	1642.04	blue
Nta17g08390	6451.08	3750.11	2700.98	1049.13	blue
Nta07g23730	6218.17	3749.65	2468.52	1281.13	blue
Nta19g05550	5601.51	3749.51	1852	1897.5	blue
novel.2033	6508.22	3749.45	2758.77	990.677	blue
Nta12g20910	6509.58	3748.83	2760.76	988.069	blue
Nta05g21680	6111.9	3748.74	2363.17	1385.57	blue
Nta02g21620	6205.58	3748.54	2457.05	1291.49	blue
Nta05g07060	6534.45	3748.32	2786.13	962.192	blue
Nta04g05350	5638.65	3748.16	1890.48	1857.68	blue
Nta22g13980	6534.97	3748.1	2786.86	961.238	blue
Nta01g08220	5940.89	3747.65	2193.24	1554.42	blue
Nta23g15790	5839.32	3747.5	2091.82	1655.69	blue
Nta14g10510	6010.58	3747.45	2263.12	1484.33	blue
Nta13g05230	6183.53	3747.02	2436.52	1310.5	blue
Nta15g04820	6386.37	3747	2639.36	1107.64	blue
Nta02g12170	6247.02	3746.92	2500.09	1246.83	blue
Nta24g01290	6197.96	3746.49	2451.47	1295.01	blue
Nta15g15680	6350.85	3746.01	2604.84	1141.17	blue
Nta11g08930	6537.85	3745.82	2792.03	953.786	blue
Nta11g11720	6530.42	3745.67	2784.75	960.921	blue
novel.6045	5705.93	3745.62	1960.3	1785.32	blue
Nta04g26440	5613.88	3745.38	1868.5	1876.88	blue
Nta08g05800	6327.76	3745.2	2582.56	1162.64	blue
Nta12g10040	6308.56	3745.01	2563.55	1181.46	blue
Nta08g12740	6503.49	3743.96	2759.53	984.439	blue
Nta24g19240	5616.92	3743.58	1873.34	1870.24	blue
novel.1683	6110.52	3743.55	2366.97	1376.58	blue
Nta05g09850	6321.01	3742.74	2578.27	1164.47	blue
Nta21g04050	5931.98	3742.55	2189.43	1553.13	blue
novel.5075	5625.54	3742.41	1883.13	1859.28	blue
Nta14g03450	6491.71	3742.06	2749.65	992.401	blue
Nta20g12990	5698.84	3741.58	1957.26	1784.33	blue
Nta20g15900	5739.17	3741.34	1997.83	1743.51	blue
Nta02g03060	6348.71	3741.29	2607.42	1133.87	blue
Nta15g26800	6331.89	3740.94	2590.95	1149.98	blue
Nta15g11420	6288.85	3740.55	2548.3	1192.25	blue
novel.742	5570.28	3740.18	1830.09	1910.09	blue
Nta07g03340	6136.54	3740.05	2396.49	1343.56	blue
Nta10g23520	6395.98	3739.67	2656.31	1083.37	blue
Nta12g18360	5580.93	3739.27	1841.66	1897.6	blue
Nta04g06770	6465.12	3739.19	2725.92	1013.27	blue
Nta01g15740	6163.83	3738.09	2425.74	1312.35	blue
Nta01g05110	6445.17	3737.82	2707.35	1030.47	blue
Nta02g23930	5875.37	3737.68	2137.68	1600	blue
Nta02g16570	5915.18	3737.58	2177.59	1559.99	blue
Nta01g07340	5564.37	3737.25	1827.13	1910.12	blue
Nta03g30940	6466.37	3737.13	2729.24	1007.89	blue
Nta15g14090	5697.84	3736.78	1961.06	1775.72	blue
Nta10g22200	6531.06	3736.72	2794.34	942.38	blue
novel.2385	5663.53	3736.63	1926.9	1809.72	blue
novel.3607	6538.87	3736.45	2802.42	934.035	blue
Nta12g05860	5875.87	3736.21	2139.66	1596.54	blue
novel.7215	6220.88	3736.12	2484.75	1251.37	blue
novel.6789	6473.9	3735.92	2737.98	997.942	blue
Nta05g06950	5746.8	3735.61	2011.19	1724.42	blue
Nta18g18440	6029.19	3735.48	2293.7	1441.78	blue
Nta11g07620	6528.26	3735.22	2793.04	942.175	blue
Nta10g06500	6511.5	3735.14	2776.36	958.778	blue
Nta11g02070	6125.44	3735.12	2390.32	1344.8	blue
Nta04g02010	6401.69	3734.85	2666.84	1068.01	blue
Nta06g06070	5555.16	3734.08	1821.08	1913	blue
Nta07g06580	6295.87	3734	2561.88	1172.12	blue
Nta06g14840	5556.84	3733.89	1822.96	1910.93	blue
Nta06g08620	6421.97	3733.14	2688.83	1044.31	blue
Nta01g20250	6493.35	3732.91	2760.44	972.47	blue
Nta18g20650	6318.18	3732.83	2585.35	1147.48	blue
Nta18g06720	6270.5	3732.66	2537.84	1194.83	blue
novel.5624	5583.37	3731.83	1851.54	1880.3	blue
Nta04g19790	5694.86	3731.76	1963.1	1768.66	blue
Nta05g07510	5732.4	3731.61	2000.79	1730.81	blue
novel.1158	5591.99	3730.74	1861.25	1869.48	blue
Nta24g17500	6189.54	3730.34	2459.2	1271.14	blue
Nta20g02750	5683.38	3730.29	1953.09	1777.19	blue
novel.7240	5862.85	3730.05	2132.8	1597.25	blue
Nta04g18700	5862.64	3729.98	2132.66	1597.32	blue
Nta13g05200	6538.85	3729.63	2809.23	920.402	blue
Nta19g17550	6379.3	3729.51	2649.79	1079.72	blue
Nta10g01070	5716.8	3728.73	1988.07	1740.65	blue
Nta04g22020	6168.66	3728.45	2440.21	1288.24	blue
Nta03g05930	6014.55	3728.25	2286.3	1441.95	blue
Nta17g08940	6561.91	3728.11	2833.8	894.307	blue
Nta01g31240	6428.62	3728.01	2700.61	1027.4	blue
Nta17g03540	6382.12	3727.97	2654.15	1073.83	blue
Nta10g17910	6478.34	3727.81	2750.53	977.275	blue
Nta16g19980	6556.1	3727.77	2828.33	899.443	blue
Nta11g01180	6040.34	3727.73	2312.62	1415.11	blue
Nta02g15910	5929.2	3727.6	2201.61	1525.99	blue
Nta01g25290	6394.7	3727.4	2667.3	1060.1	blue
Nta15g00240	6564.67	3726.76	2837.91	888.844	blue
Nta14g19760	5741.13	3726.45	2014.68	1711.78	blue
Nta03g22150	5538.86	3726.16	1812.7	1913.47	blue
Nta18g21300	6539.86	3725.8	2814.06	911.735	blue
Nta09g11910	5936.82	3725.71	2211.11	1514.59	blue
Nta12g01380	6270.4	3725.65	2544.75	1180.91	blue
Nta08g02320	5660.09	3725.47	1934.62	1790.85	blue
Nta02g26270	6175.93	3724.97	2450.95	1274.02	blue
Nta13g14690	6514.49	3724.7	2789.78	934.919	blue
Nta15g09360	5850.7	3723.68	2127.02	1596.67	blue
Nta20g05300	6046.94	3723.52	2323.42	1400.1	blue
novel.2774	6013.13	3723.48	2289.64	1433.84	blue
Nta24g07250	6567.58	3723.35	2844.23	879.124	blue
Nta17g01780	5579.8	3723.16	1856.63	1866.53	blue
Nta18g03560	5772.5	3722.89	2049.61	1673.27	blue
novel.91	5614.27	3722.82	1891.45	1831.37	blue
Nta01g00820	6170.24	3722.65	2447.59	1275.06	blue
Nta06g28230	5751.02	3722.24	2028.79	1693.45	blue
novel.1933	5892.12	3721.86	2170.27	1551.59	blue
Nta05g03030	6559.39	3721.7	2837.69	884.013	blue
Nta21g15920	6150.64	3721.6	2429.05	1292.55	blue
Nta08g09000	6568.97	3721.42	2847.55	873.877	blue
Nta04g08720	5735.56	3721.42	2014.14	1707.28	blue
Nta06g17430	6415.47	3720.92	2694.54	1026.38	blue
Nta08g02790	6365.55	3720.9	2644.65	1076.24	blue
Nta04g21040	5914.48	3720.6	2193.89	1526.71	blue
Nta18g20140	5523.86	3720.28	1803.58	1916.7	blue
Nta12g11400	5603.09	3720.23	1882.87	1837.36	blue
Nta11g24490	6572.57	3719.73	2852.83	866.9	blue
Nta03g10480	6566.32	3719.31	2847.01	872.303	blue
Nta24g04710	6331.72	3718.98	2612.74	1106.25	blue
Nta16g17860	6567.03	3718.8	2848.23	870.574	blue
novel.2567	5912.3	3718.57	2193.73	1524.84	blue
novel.5498	5613.93	3718.41	1895.52	1822.88	blue
Nta02g24390	5517.43	3718.28	1799.14	1919.14	blue
Nta19g04180	6495.29	3718.2	2777.09	941.113	blue
Nta21g15930	6203.33	3718.03	2485.3	1232.72	blue
Nta01g21170	5890.3	3717.76	2172.55	1545.21	blue
Nta16g13420	5953.57	3717.71	2235.86	1481.85	blue
Nta12g20940	6475.81	3717.21	2758.6	958.612	blue
Nta01g22030	6552.92	3716.98	2835.93	881.051	blue
Nta16g05480	6573.22	3716.61	2856.61	860.003	blue
Nta21g05450	6139.55	3716.53	2423.02	1293.51	blue
Nta05g11190	5710.89	3716.49	1994.4	1722.1	blue
Nta22g08210	6177.16	3716.46	2460.7	1255.77	blue
Nta01g32070	6113.77	3716.41	2397.36	1319.04	blue
novel.4610	5929.06	3716.37	2212.69	1503.69	blue
Nta07g17310	6516.43	3716.33	2800.1	916.238	blue
Nta23g16590	6557.1	3716.2	2840.9	875.303	blue
Nta02g29610	6561.56	3716.18	2845.38	870.808	blue
Nta21g02560	5560.85	3715.55	1845.3	1870.24	blue
Nta11g12970	6557.99	3715.43	2842.56	872.873	blue
novel.7307	6579.2	3715.38	2863.82	851.563	blue
Nta16g21390	5732.62	3714.33	2018.29	1696.03	blue
Nta02g32800	6469.29	3714.28	2755.01	959.265	blue
Nta03g24920	5709.95	3713.62	1996.33	1717.29	blue
Nta24g21770	6241.05	3713.54	2527.52	1186.02	blue
Nta22g04280	6531.31	3713.11	2818.2	894.91	blue
Nta11g12920	6570.86	3713.03	2857.83	855.196	blue
Nta24g07640	5531.57	3713	1818.57	1894.43	blue
Nta18g09030	5661.79	3712.84	1948.95	1763.88	blue
Nta21g09590	5765.89	3712.75	2053.13	1659.62	blue
Nta23g19890	6568.86	3712.36	2856.5	855.855	blue
Nta18g02510	5976.78	3712.33	2264.45	1447.87	blue
Nta12g07910	5564.64	3712.12	1852.52	1859.6	blue
novel.1405	5529.18	3711.98	1817.2	1894.78	blue
novel.3757	6463.7	3711.86	2751.84	960.016	blue
Nta01g17170	5927.27	3711.47	2215.8	1495.66	blue
Nta03g27310	5665.09	3711.35	1953.74	1757.61	blue
Nta22g09640	6079.76	3711.3	2368.46	1342.83	blue
Nta06g01190	5691.86	3711.15	1980.71	1730.43	blue
novel.1080	5772.63	3711	2061.63	1649.37	blue
Nta05g18490	6512.19	3710.88	2801.31	909.575	blue
Nta18g09340	5742.96	3710.38	2032.58	1677.81	blue
Nta04g00460	5635.31	3709.41	1925.9	1783.51	blue
Nta03g12320	6576.51	3709.11	2867.4	841.713	blue
Nta11g00380	5561.52	3708.49	1853.03	1855.46	blue
Nta01g04490	6418.59	3707.59	2711.01	996.579	blue
Nta04g31270	5659.6	3707.39	1952.21	1755.18	blue
novel.553	6042.5	3706.25	2336.26	1369.99	blue
Nta07g22300	5500.17	3706.09	1794.08	1912.01	blue
Nta17g22920	5860.42	3705.44	2154.98	1550.46	blue
Nta02g19200	6383.48	3705.2	2678.28	1026.91	blue
Nta06g09960	6365.68	3704.72	2660.96	1043.76	blue
Nta04g18690	6584.77	3704.53	2880.24	824.283	blue
Nta17g18520	5520.4	3704.46	1815.94	1888.52	blue
Nta05g32400	6584.88	3704.31	2880.57	823.74	blue
novel.1525	5537.59	3704.15	1833.44	1870.71	blue
Nta17g07020	6587.36	3703.84	2883.52	820.324	blue
novel.4705	6155.62	3703.55	2452.07	1251.47	blue
Nta14g01450	5807.94	3703.07	2104.88	1598.19	blue
Nta03g06800	6253.66	3702.91	2550.75	1152.16	blue
Nta13g23150	6593.37	3702.67	2890.69	811.98	blue
Nta01g29630	5887.58	3702.66	2184.91	1517.75	blue
Nta18g15100	5673.25	3702.59	1970.66	1731.93	blue
Nta03g18310	6357.34	3702.58	2654.75	1047.83	blue
Nta07g14190	6176.49	3702.42	2474.07	1228.35	blue
novel.2005	6300.63	3701.95	2598.68	1103.28	blue
Nta08g21410	5602.39	3701.82	1900.57	1801.25	blue
Nta04g24480	6547.89	3701.44	2846.45	854.989	blue
Nta19g13090	6281.03	3700.97	2580.05	1120.92	blue
novel.1801	5503.19	3700.87	1802.31	1898.56	blue
novel.879	6265.79	3700.82	2564.96	1135.86	blue
Nta02g12990	5476.6	3700.45	1776.15	1924.3	blue
Nta24g05840	5494.67	3700.24	1794.43	1905.81	blue
Nta18g12530	5888.03	3699.9	2188.12	1511.78	blue
Nta07g08790	6307.52	3699.88	2607.63	1092.25	blue
Nta19g17950	5491.95	3699.83	1792.11	1907.72	blue
Nta06g20030	5545.29	3699.59	1845.69	1853.9	blue
Nta13g04090	5483.99	3699.52	1784.47	1915.06	blue
Nta13g07500	5944.98	3699.2	2245.78	1453.42	blue
Nta12g28190	5493.63	3699.16	1794.47	1904.69	blue
Nta10g21860	6488.29	3699.04	2789.24	909.801	blue
novel.6325	6506.51	3698.67	2807.84	890.836	blue
novel.2448	6599.35	3697.53	2901.82	795.716	blue
Nta00g07690	5585.07	3697.52	1887.55	1809.97	blue
Nta17g25580	5491.2	3697.4	1793.8	1903.6	blue
Nta03g30640	6551.03	3697.33	2853.7	843.629	blue
Nta06g06750	6433.6	3697.15	2736.44	960.711	blue
Nta06g27460	6449.97	3696.73	2753.24	943.484	blue
Nta18g24030	6453.77	3696.11	2757.66	938.452	blue
Nta23g24000	5467.44	3695.85	1771.59	1924.26	blue
Nta14g13080	6264.43	3695.74	2568.7	1127.04	blue
novel.2010	5860.97	3695.59	2165.38	1530.21	blue
Nta21g06790	6321.33	3695.53	2625.8	1069.73	blue
Nta03g01570	6513.45	3695.5	2817.95	877.551	blue
Nta19g13580	6096.42	3695.45	2400.97	1294.49	blue
Nta22g10600	6324.26	3694.45	2629.81	1064.65	blue
Nta21g06050	6189.68	3694.08	2495.6	1198.48	blue
Nta20g02790	6459.05	3694.03	2765.02	929.011	blue
Nta13g08270	5522.11	3694.02	1828.08	1865.94	blue
Nta06g14630	6025.27	3694.02	2331.25	1362.77	blue
novel.6547	6252.51	3693.37	2559.14	1134.23	blue
Nta09g06840	5676.04	3693.31	1982.74	1710.57	blue
novel.3346	6596.89	3693.18	2903.71	789.472	blue
novel.1445	5807.5	3693.11	2114.39	1578.72	blue
Nta22g10240	6371.78	3693.11	2678.68	1014.43	blue
Nta10g19270	5463.97	3693.05	1770.92	1922.12	blue
Nta06g24690	5610.53	3692.68	1917.85	1774.83	blue
Nta02g27400	6405.69	3692.67	2713.02	979.648	blue
Nta04g31360	6287.75	3692.64	2595.11	1097.52	blue
Nta12g06710	6019.35	3692.59	2326.77	1365.82	blue
novel.623	5745.69	3692.58	2053.11	1639.47	blue
Nta08g16720	5636.86	3692.47	1944.39	1748.09	blue
Nta07g00230	6356.08	3691.77	2664.31	1027.46	blue
Nta04g12100	6029.07	3691.56	2337.5	1354.06	blue
Nta07g18450	6027.12	3691.02	2336.1	1354.91	blue
novel.112	6265.42	3690.74	2574.69	1116.05	blue
Nta06g00680	6530.32	3690.63	2839.69	850.94	blue
Nta07g18340	6161.23	3690.27	2470.97	1219.3	blue
Nta09g14720	5786.63	3690.19	2096.44	1593.74	blue
Nta05g21090	5574.4	3690.11	1884.28	1805.83	blue
Nta03g07810	5541.71	3690.04	1851.67	1838.38	blue
Nta07g01120	6599.43	3689.53	2909.89	779.642	blue
Nta06g14580	6055.78	3689.53	2366.25	1323.28	blue
Nta03g35380	6597.7	3689.4	2908.3	781.1	blue
novel.3867	5565.54	3689.3	1876.24	1813.06	blue
Nta04g01530	6214.61	3689.14	2525.47	1163.67	blue
Nta11g11490	5538.4	3688.91	1849.49	1839.43	blue
Nta11g09100	5959.21	3688.84	2270.37	1418.48	blue
Nta19g12790	6486.4	3688.72	2797.68	891.045	blue
Nta07g01590	5478.99	3688.66	1790.33	1898.33	blue
novel.4163	6115.01	3687.65	2427.36	1260.29	blue
Nta15g01140	6544.07	3687.64	2856.43	831.206	blue
Nta09g25800	6533.67	3687.53	2846.14	841.388	blue
novel.5972	5547.21	3687.28	1859.93	1827.36	blue
Nta02g15480	5446.63	3687.27	1759.35	1927.92	blue
Nta08g01680	6147.11	3687.26	2459.84	1227.42	blue
Nta03g23490	6598.51	3687.17	2911.34	775.833	blue
Nta15g26960	6364.17	3686.99	2677.18	1009.81	blue
novel.2540	6584.23	3686.81	2897.41	789.399	blue
Nta18g01620	5498.95	3686.32	1812.62	1873.7	blue
novel.3806	5444.42	3686.26	1758.17	1928.09	blue
Nta11g07470	5444.17	3686.05	1758.13	1927.92	blue
Nta12g21730	6044.92	3685.99	2358.92	1327.07	blue
Nta12g16890	6321.15	3685.95	2635.2	1050.74	blue
Nta03g15340	5641.19	3685.46	1955.74	1729.72	blue
Nta15g21890	5450.2	3685.17	1765.03	1920.15	blue
Nta08g01560	5677.53	3685.14	1992.39	1692.75	blue
Nta12g32930	6602.78	3685.12	2917.66	767.455	blue
Nta08g22180	5535.37	3684.86	1850.51	1834.35	blue
Nta01g18020	6603.05	3684.82	2918.24	766.584	blue
novel.1590	6611.55	3684.63	2926.91	757.72	blue
Nta08g15920	5546.38	3684.63	1861.75	1822.88	blue
Nta18g05780	6262.54	3684.32	2578.22	1106.09	blue
Nta02g16910	5872.06	3683.08	2188.98	1494.1	blue
Nta11g30260	5445.24	3683.08	1762.16	1920.92	blue
Nta08g21180	5594.69	3682.32	1912.37	1769.95	blue
Nta12g18410	5609.77	3681.91	1927.86	1754.05	blue
Nta08g21330	6406.95	3681.17	2725.77	955.403	blue
Nta09g04990	6268.36	3680.73	2587.63	1093.1	blue
Nta10g01490	6506.54	3679.89	2826.65	853.241	blue
Nta09g19020	5500.97	3679.38	1821.59	1857.78	blue
Nta16g19520	6588.05	3678.62	2909.43	769.196	blue
Nta19g09170	5814.47	3678.19	2136.28	1541.91	blue
Nta17g18260	6184.72	3678.17	2506.55	1171.62	blue
novel.6621	6285.98	3677.69	2608.29	1069.4	blue
novel.3316	6382.94	3677.34	2705.6	971.743	blue
Nta21g07340	6272.97	3677.13	2595.84	1081.29	blue
Nta11g05430	6592.5	3676.68	2915.82	760.857	blue
Nta20g08940	5453.82	3676.6	1777.23	1899.37	blue
Nta00g13920	6489.69	3676.56	2813.13	863.424	blue
Nta15g01000	6356.22	3676.33	2679.89	996.439	blue
Nta01g28670	6397.48	3676.01	2721.47	954.544	blue
Nta14g04600	5697.31	3675.99	2021.32	1654.67	blue
novel.576	6451.65	3675.98	2775.68	900.298	blue
Nta01g11140	5525.64	3675.91	1849.73	1826.18	blue
Nta10g13660	5541.28	3675.75	1865.53	1810.22	blue
Nta18g08910	6467.68	3675.74	2791.95	883.793	blue
Nta08g21480	6253.06	3675.5	2577.56	1097.94	blue
Nta10g03460	5640.53	3675.5	1965.04	1710.46	blue
Nta18g16700	5521.54	3675.45	1846.09	1829.36	blue
Nta10g01390	5521.3	3675.24	1846.06	1829.18	blue
Nta10g14070	5992.58	3675.2	2317.38	1357.82	blue
Nta07g19010	6062.62	3674.97	2387.65	1287.32	blue
Nta13g16670	5758.28	3674.24	2084.04	1590.19	blue
Nta12g02600	6381.87	3674.23	2707.64	966.596	blue
novel.2660	6382.02	3673.8	2708.22	965.581	blue
Nta12g11110	5903.94	3673.33	2230.6	1442.73	blue
Nta20g08650	6028.95	3673.33	2355.62	1317.71	blue
Nta13g22410	6602.01	3672.91	2929.09	743.82	blue
novel.1944	6193.07	3672.4	2520.68	1151.72	blue
Nta05g24100	5760.33	3672.15	2088.18	1583.96	blue
Nta06g05190	5820.35	3671.75	2148.6	1523.16	blue
Nta16g09960	6515.41	3671.61	2843.8	827.807	blue
Nta01g09790	6624.25	3671.43	2952.82	718.611	blue
Nta04g25750	5574.6	3671.02	1903.58	1767.44	blue
Nta16g07470	5421.01	3670.79	1750.23	1920.56	blue
Nta16g14040	6473.09	3670.57	2802.52	868.046	blue
Nta19g10110	5471.65	3670.47	1801.18	1869.28	blue
Nta23g24220	5825.74	3670.05	2155.69	1514.36	blue
Nta19g14390	5410.32	3669.62	1740.7	1928.92	blue
Nta20g10880	6469.96	3669.26	2800.7	868.563	blue
Nta02g12200	5502.21	3669.19	1833.02	1836.17	blue
Nta15g05540	6407.8	3669.08	2738.72	930.352	blue
Nta16g07130	6291.53	3668.66	2622.87	1045.79	blue
Nta22g16940	6268.72	3668.5	2600.22	1068.29	blue
Nta16g23180	5493.02	3668.5	1824.52	1843.98	blue
novel.6096	6596.08	3668.45	2927.63	740.817	blue
Nta09g15430	5933.23	3667.83	2265.4	1402.43	blue
Nta18g03300	6541.66	3667.72	2873.94	793.78	blue
Nta16g24320	6621.67	3667.31	2954.36	712.95	blue
Nta02g19690	5719.01	3666.8	2052.21	1614.59	blue
Nta20g09110	6002.19	3666.69	2335.5	1331.19	blue
novel.6530	5698.08	3666.55	2031.53	1635.01	blue
Nta14g09190	6593.07	3665.9	2927.17	738.728	blue
novel.432	6415.27	3665.75	2749.52	916.225	blue
Nta20g18880	5403.68	3665.66	1738.02	1927.64	blue
Nta03g32150	5948.8	3665.29	2283.51	1381.78	blue
Nta19g00820	5419.67	3665.11	1754.57	1910.54	blue
Nta09g18870	6610.95	3664.94	2946.01	718.925	blue
Nta20g06380	5470.49	3664.86	1805.63	1859.23	blue
Nta16g11180	5487.79	3664.66	1823.13	1841.53	blue
Nta12g24810	6043.18	3664.43	2378.75	1285.69	blue
Nta20g02480	6277.96	3664.24	2613.72	1050.53	blue
Nta08g16710	6494.19	3663.01	2831.18	831.829	blue
Nta05g06750	5488.88	3662.79	1826.09	1836.71	blue
Nta03g05670	5579.75	3662.63	1917.12	1745.5	blue
Nta02g31790	5870.33	3661.78	2208.56	1453.22	blue
novel.3135	6312.39	3661.54	2650.86	1010.68	blue
Nta10g21830	6507.61	3661.23	2846.38	814.847	blue
Nta17g03580	5876.47	3661.19	2215.28	1445.91	blue
Nta21g14130	5679.41	3661.13	2018.28	1642.85	blue
Nta21g15910	5394.19	3660.97	1733.22	1927.75	blue
Nta19g16790	5947.32	3660.9	2286.42	1374.48	blue
Nta12g00150	5945.67	3660.48	2285.19	1375.28	blue
Nta02g14230	6077.59	3660.4	2417.19	1243.21	blue
novel.5287	6625.9	3659.71	2966.19	693.516	blue
Nta23g04480	6261.45	3659.7	2601.75	1057.96	blue
Nta22g07700	6617.75	3659.53	2958.22	701.303	blue
Nta06g17150	6037.21	3659.48	2377.73	1281.75	blue
Nta11g12850	6229.56	3659.26	2570.31	1088.95	blue
Nta13g15780	5533.11	3658.64	1874.48	1784.16	blue
Nta08g12320	5773.4	3658.63	2114.77	1543.85	blue
Nta06g27010	5836.1	3658.56	2177.54	1481.02	blue
Nta00g08220	5384.65	3657.61	1727.04	1930.57	blue
Nta11g02510	5981.63	3657.44	2324.18	1333.26	blue
Nta00g15870	6402.71	3657.3	2745.41	911.896	blue
Nta23g15340	5535.44	3657.24	1878.2	1779.05	blue
novel.3375	6035.06	3657.08	2377.98	1279.11	blue
Nta23g21750	6369.13	3656.81	2712.32	944.495	blue
Nta03g22970	6598.82	3656.4	2942.42	713.975	blue
novel.1969	5494.16	3656.13	1838.02	1818.11	blue
Nta13g03700	6640.33	3656.13	2984.2	671.925	blue
Nta15g02760	5398.29	3654.85	1743.44	1911.4	blue
Nta11g21140	5859.41	3654.8	2204.61	1450.19	blue
Nta20g08980	5765.98	3654.8	2111.18	1543.62	blue
Nta23g20470	5507.73	3654.7	1853.03	1801.67	blue
Nta08g07130	5663.53	3653.93	2009.6	1644.33	blue
Nta19g12630	5536.61	3653.84	1882.77	1771.07	blue
Nta15g04250	5653.19	3653.67	1999.52	1654.14	blue
Nta11g19500	5815.93	3653.39	2162.54	1490.86	blue
Nta11g05800	5649.92	3652.94	1996.98	1655.97	blue
Nta10g19040	6641.13	3652.81	2988.31	664.501	blue
Nta07g08090	5425	3652.81	1772.2	1880.61	blue
Nta18g03440	5788.89	3652.69	2136.2	1516.49	blue
Nta13g12560	5388.37	3652.64	1735.73	1916.91	blue
Nta24g17770	5705.69	3652.31	2053.38	1598.93	blue
Nta11g16910	6339.93	3652.03	2687.9	964.133	blue
Nta20g06940	5538.06	3651.98	1886.09	1765.89	blue
Nta05g19430	5616.69	3651.75	1964.94	1686.81	blue
novel.2595	6526.18	3651.73	2874.45	777.278	blue
Nta23g14780	6392.02	3651.56	2740.46	911.092	blue
Nta23g19500	6379.99	3651.53	2728.46	923.068	blue
Nta21g16850	6541.06	3651.45	2889.61	761.833	blue
Nta13g02230	6263.46	3651.02	2612.44	1038.57	blue
Nta01g27640	6501.87	3650.78	2851.09	799.691	blue
Nta09g13380	6628.79	3650.71	2978.08	672.622	blue
Nta24g09340	5957.76	3650.48	2307.29	1343.19	blue
Nta02g14880	6571.57	3649.97	2921.61	728.362	blue
Nta06g07250	6553.49	3649.4	2904.09	745.308	blue
Nta22g15070	6642.05	3649.39	2992.66	656.739	blue
Nta14g17740	5483.13	3649.39	1833.74	1815.65	blue
Nta01g05190	5579.93	3648.83	1931.1	1717.73	blue
Nta14g10430	5639.02	3648.42	1990.61	1657.81	blue
Nta12g31190	6326.47	3648.16	2678.31	969.85	blue
Nta10g07500	5440.62	3648.02	1792.6	1855.42	blue
Nta23g18850	6411.31	3647.9	2763.41	884.487	blue
Nta13g10210	5398.62	3646.81	1751.82	1894.99	blue
Nta07g04600	6601.55	3646.69	2954.86	691.839	blue
Nta09g17390	5659.95	3646.21	2013.73	1632.48	blue
Nta07g07500	6648.86	3645.78	3003.07	642.709	blue
Nta15g01080	6114.89	3644.78	2470.11	1174.66	blue
Nta15g10470	6276.7	3644.68	2632.02	1012.66	blue
Nta02g10050	6009.85	3644.11	2365.74	1278.37	blue
Nta11g10680	5732.19	3644.07	2088.12	1555.96	blue
Nta15g09050	6006.16	3643.9	2362.27	1281.63	blue
Nta13g08890	6300.83	3643.53	2657.3	986.224	blue
novel.3572	5783.62	3643.12	2140.51	1502.61	blue
Nta05g17610	5353.22	3642.51	1710.71	1931.8	blue
novel.1232	6425.36	3642.28	2783.09	859.188	blue
Nta14g19190	6536.16	3642.18	2893.98	748.197	blue
Nta05g21490	6619.34	3642.14	2977.2	664.943	blue
Nta24g18020	6387.15	3642.12	2745.03	897.091	blue
novel.8023	5826.88	3641.88	2185	1456.88	blue
novel.1265	6473.8	3640.86	2832.93	807.932	blue
Nta14g01410	5408.68	3640.61	1768.07	1872.55	blue
Nta04g31650	6031.77	3640.39	2391.38	1249.01	blue
Nta03g32280	6528.47	3640.35	2888.12	752.229	blue
Nta01g02890	5563.55	3639.88	1923.67	1716.21	blue
novel.7299	6412.78	3639.73	2773.05	866.68	blue
Nta04g00720	6608.19	3639.55	2968.64	670.907	blue
Nta24g10470	6379.96	3639.41	2740.55	898.856	blue
Nta07g02690	5430.61	3639.2	1791.41	1847.79	blue
novel.165	6318.39	3639.2	2679.19	960.003	blue
novel.3363	6653.44	3638.95	3014.5	624.447	blue
Nta11g03770	5480.35	3638.81	1841.54	1797.27	blue
Nta23g10690	6403.96	3638.68	2765.28	873.399	blue
Nta12g29030	6649.04	3638.38	3010.66	627.714	blue
Nta11g00360	6393.38	3637.94	2755.44	882.497	blue
Nta14g20480	6367.18	3637.82	2729.36	908.457	blue
Nta04g27950	5573.87	3637.71	1936.16	1701.55	blue
Nta13g10140	5658.47	3637.2	2021.27	1615.92	blue
Nta00g05840	5744.7	3636.97	2107.73	1529.24	blue
Nta03g07290	6596.26	3636.7	2959.55	677.146	blue
novel.4545	5340.34	3636.26	1704.09	1932.17	blue
Nta10g15170	6289.21	3635.33	2653.88	981.45	blue
novel.7446	5580.81	3635.24	1945.56	1689.68	blue
Nta04g26020	6164.66	3635.04	2529.62	1105.42	blue
Nta04g07020	6654.13	3635	3019.13	615.877	blue
Nta05g00060	6645.47	3634.75	3010.72	624.028	blue
novel.2548	5984.23	3634.55	2349.68	1284.87	blue
Nta04g10230	5954.72	3634.14	2320.58	1313.56	blue
Nta17g02020	5511.88	3633.72	1878.16	1755.57	blue
Nta11g05760	6116.75	3633.67	2483.09	1150.58	blue
Nta13g22680	6521.52	3633.63	2887.89	745.745	blue
Nta05g03350	6512.8	3633.52	2879.28	754.239	blue
Nta03g00140	6491.02	3632.91	2858.11	774.795	blue
Nta04g20670	5363.68	3632.68	1731	1901.68	blue
Nta00g06490	6151.44	3632.57	2518.86	1113.71	blue
Nta16g06860	5672.96	3632.51	2040.45	1592.06	blue
Nta09g10340	5625.16	3632.38	1992.78	1639.6	blue
Nta15g03420	5715.07	3632.15	2082.91	1549.24	blue
Nta23g22380	5334.87	3632.13	1702.74	1929.38	blue
Nta08g12070	6053.78	3631.99	2421.79	1210.2	blue
novel.5356	6527.24	3631.79	2895.45	736.335	blue
Nta05g01160	6605.08	3631.7	2973.38	658.313	blue
Nta16g10300	5534.16	3631.61	1902.55	1729.05	blue
Nta13g16020	5700.89	3631.59	2069.3	1562.29	blue
Nta23g07590	5388.52	3631.52	1757.01	1874.51	blue
Nta12g05470	5361.14	3631.09	1730.05	1901.03	blue
Nta01g17010	6550.02	3630.96	2919.06	711.903	blue
Nta02g04170	5797.69	3630.39	2167.3	1463.09	blue
Nta02g28880	5597.26	3629.58	1967.68	1661.91	blue
novel.7557	6603.96	3629.43	2974.53	654.899	blue
Nta06g05370	5586.1	3629.25	1956.85	1672.4	blue
Nta09g12820	6434.88	3628.87	2806.01	822.854	blue
Nta03g31740	5483.61	3628.13	1855.48	1772.65	blue
novel.1256	6244.12	3628.1	2616.01	1012.09	blue
Nta09g13760	5327.78	3627.84	1699.94	1927.89	blue
novel.5721	5700.98	3627.76	2073.22	1554.54	blue
Nta09g24970	5324.42	3627.72	1696.7	1931.02	blue
Nta16g12570	6194.75	3627.26	2567.49	1059.77	blue
Nta03g12180	5333.51	3627.05	1706.45	1920.6	blue
novel.5703	6529.8	3626.75	2903.04	723.711	blue
novel.1452	5360.18	3626.58	1733.6	1892.99	blue
Nta10g20800	5353.2	3626.55	1726.64	1899.91	blue
Nta01g15120	5486.55	3626.53	1860.02	1766.51	blue
Nta04g26950	6641.99	3626.49	3015.5	610.986	blue
Nta07g22210	6528.89	3626.43	2902.46	723.967	blue
Nta18g16830	5323.95	3625.8	1698.16	1927.64	blue
Nta04g20540	6506.78	3625.37	2881.41	743.965	blue
novel.4334	6545.12	3625.08	2920.04	705.033	blue
Nta09g25210	6299.55	3624.85	2674.7	950.145	blue
Nta20g12610	6166.65	3624.78	2541.87	1082.92	blue
Nta16g06600	5504.31	3624.61	1879.7	1744.91	blue
Nta01g31930	6368.1	3624.07	2744.02	880.05	blue
Nta15g23170	5315.68	3623.89	1691.79	1932.1	blue
Nta00g09030	6415.85	3623.77	2792.08	831.689	blue
Nta02g23830	6662.58	3623.62	3038.96	584.659	blue
Nta18g18640	6665.19	3623.26	3041.93	581.329	blue
Nta13g07430	5481.19	3622.91	1858.28	1764.63	blue
Nta17g20980	6509.42	3622.7	2886.72	735.976	blue
Nta09g20140	6646.17	3622.46	3023.71	598.751	blue
Nta03g13420	6630.46	3622.36	3008.1	614.262	blue
Nta13g06330	6081.33	3622.34	2458.99	1163.35	blue
Nta18g11310	6652.95	3622.27	3030.67	591.601	blue
Nta12g20380	5808.01	3622.27	2185.74	1436.53	blue
novel.4726	6363.18	3621.59	2741.59	879.998	blue
Nta08g20950	5313.59	3621.29	1692.3	1929	blue
Nta02g24620	6648.23	3620.88	3027.36	593.518	blue
Nta03g16810	6593.93	3620.87	2973.06	647.808	blue
novel.873	5378.62	3620.6	1758.02	1862.57	blue
Nta05g27150	6229.38	3620.37	2609.01	1011.35	blue
Nta17g23070	5425.11	3619.08	1806.03	1813.05	blue
Nta19g04000	6438.64	3618.96	2819.68	799.288	blue
Nta05g04350	6244.37	3618.91	2625.46	993.452	blue
novel.6981	6597.56	3618.22	2979.35	638.872	blue
Nta09g09850	6504.55	3617.3	2887.25	730.052	blue
Nta05g23630	6669.98	3617.26	3052.72	564.543	blue
Nta20g19920	5446.44	3617.17	1829.28	1787.89	blue
Nta07g21770	5534.07	3616.34	1917.73	1698.61	blue
Nta04g19890	6131.59	3615.98	2515.6	1100.38	blue
Nta15g00760	6662.6	3615.35	3047.25	568.099	blue
Nta23g23940	6322.29	3614.65	2707.65	906.999	blue
Nta16g25080	6299.24	3614.41	2684.83	929.586	blue
Nta20g03790	6664.84	3614.36	3050.48	563.877	blue
Nta07g14950	6444.96	3614.33	2830.63	783.698	blue
Nta16g17360	5349.16	3614.04	1735.12	1878.92	blue
Nta01g00860	5666.21	3613.89	2052.32	1561.57	blue
Nta02g06690	6641.38	3613.79	3027.59	586.203	blue
Nta07g16600	5373.27	3613.36	1759.91	1853.45	blue
Nta04g11830	6474.65	3613.21	2861.44	751.776	blue
Nta12g06950	5629.34	3613.19	2016.15	1597.05	blue
Nta08g13490	5307.14	3613.12	1694.02	1919.1	blue
Nta06g29800	5342.63	3612.8	1729.83	1882.97	blue
Nta00g05790	6447.08	3612.13	2834.95	777.184	blue
Nta12g05380	5581.08	3611.57	1969.51	1642.06	blue
Nta16g18410	5891.12	3611.49	2279.63	1331.85	blue
Nta12g36010	5305.34	3611.3	1694.04	1917.26	blue
Nta23g04400	6372.97	3611.27	2761.69	849.584	blue
Nta01g20890	6000.17	3611.09	2389.07	1222.02	blue
Nta01g12640	6673.71	3610.88	3062.83	548.05	blue
novel.5023	6407.47	3610.54	2796.93	813.604	blue
Nta14g15870	5653.61	3610.3	2043.31	1566.98	blue
Nta13g07420	5307.56	3609.69	1697.87	1911.82	blue
Nta01g26510	6581.3	3609.38	2971.92	637.462	blue
Nta18g16820	5301.19	3609.32	1691.87	1917.45	blue
Nta04g01480	5872.68	3609.15	2263.53	1345.62	blue
Nta08g01800	5695.83	3608.46	2087.38	1521.08	blue
novel.7457	6680.23	3608.37	3071.87	536.497	blue
Nta02g03280	5724.36	3608.33	2116.03	1492.3	blue
novel.663	6294.55	3607.26	2687.28	919.978	blue
Nta18g13720	5372.17	3607.21	1764.95	1842.26	blue
Nta04g16650	5945.22	3606.9	2338.32	1268.58	blue
Nta02g23810	6589.74	3605.81	2983.93	621.885	blue
novel.6792	5616.46	3605.61	2010.84	1594.77	blue
novel.3406	5692.84	3605.34	2087.51	1517.83	blue
Nta07g10700	6649.38	3605.01	3044.37	560.639	blue
Nta04g28750	5340.47	3604.67	1735.8	1868.88	blue
Nta02g28360	5689.44	3604.34	2085.1	1519.24	blue
Nta03g26250	6476.34	3604.28	2872.06	732.217	blue
Nta11g28970	6630.17	3604.2	3025.97	578.234	blue
Nta24g12740	6290.35	3603.81	2686.54	917.265	blue
Nta01g05390	5278.07	3603.41	1674.66	1928.74	blue
Nta00g08710	5290.45	3603.14	1687.3	1915.84	blue
Nta17g06080	6222.13	3602.97	2619.16	983.812	blue
Nta14g00760	5787.67	3602.92	2184.75	1418.18	blue
novel.3237	6044.77	3602.37	2442.4	1159.97	blue
Nta04g16790	6188.13	3602.01	2586.12	1015.88	blue
Nta17g11620	5274.77	3601.95	1672.82	1929.13	blue
Nta11g20720	6621.61	3601.03	3020.59	580.439	blue
novel.3903	6442.45	3600.94	2841.5	759.439	blue
Nta17g11210	6634.46	3600.72	3033.74	566.981	blue
Nta03g22390	6643.51	3600.41	3043.1	557.303	blue
Nta20g15090	6028.55	3600.28	2428.28	1172	blue
Nta21g14680	5445.09	3600.26	1844.83	1755.43	blue
Nta04g04080	5374.75	3598.97	1775.79	1823.18	blue
novel.1877	6562.5	3598.93	2963.58	635.352	blue
Nta21g16070	5637.26	3598.88	2038.38	1560.5	blue
Nta09g20900	5375.22	3598.46	1776.76	1821.69	blue
Nta15g01710	6228.15	3598.36	2629.79	968.575	blue
Nta21g02390	6680.41	3597.83	3082.58	515.254	blue
Nta09g10320	5747.16	3597.59	2149.57	1448.02	blue
Nta15g26700	5342.01	3597.56	1744.45	1853.11	blue
Nta01g15090	6687.84	3597.17	3090.67	506.498	blue
Nta18g00510	5650.34	3597.1	2053.24	1543.85	blue
Nta02g15880	5263.95	3597.06	1666.89	1930.17	blue
Nta09g03680	6086.21	3596.6	2489.61	1106.98	blue
Nta01g19270	6647.06	3595.39	3051.67	543.724	blue
Nta03g29660	5370.01	3595.36	1774.65	1820.71	blue
Nta13g14350	6683.23	3595.32	3087.91	507.406	blue
Nta20g12900	6633.54	3595.27	3038.27	556.997	blue
Nta04g17100	5648.86	3595.19	2053.67	1541.52	blue
Nta01g21230	6268.83	3594.83	2674	920.833	blue
Nta13g15820	6680.82	3594.7	3086.11	508.589	blue
Nta11g07810	6505.48	3594.34	2911.14	683.199	blue
Nta05g19660	6256.38	3593.99	2662.39	931.597	blue
Nta04g13590	5704.84	3593.64	2111.2	1482.44	blue
Nta00g14710	6583.8	3593.2	2990.6	602.595	blue
Nta03g21130	6234.11	3592.58	2641.53	951.049	blue
Nta18g01820	6467.01	3591.51	2875.5	716.007	blue
Nta05g17560	5955.81	3591.42	2364.39	1227.03	blue
Nta12g05080	6647.36	3591.25	3056.11	535.143	blue
Nta15g20700	6430.58	3591.12	2839.47	751.651	blue
Nta07g22450	5914.51	3591.04	2323.47	1267.57	blue
Nta01g04500	5342.24	3590.85	1751.39	1839.46	blue
Nta06g18270	5697.76	3590.46	2107.3	1483.17	blue
novel.7364	5418.14	3590.26	1827.89	1762.37	blue
Nta14g02690	6687.03	3590.19	3096.84	493.355	blue
Nta05g13720	6684	3590.14	3093.86	496.275	blue
Nta09g09290	5304	3590.11	1713.89	1876.23	blue
Nta11g01470	5712.42	3590.05	2122.37	1467.68	blue
Nta10g16940	5821.69	3590	2231.69	1358.31	blue
Nta20g05180	5393.49	3589.37	1804.12	1785.25	blue
Nta19g03500	6269.42	3589.17	2680.25	908.913	blue
Nta05g32210	6340.02	3589.12	2750.9	838.217	blue
Nta08g20570	6654.9	3588.91	3066	522.907	blue
Nta04g02950	6548.31	3587.53	2960.78	626.749	blue
Nta13g10800	6695.6	3587.47	3108.13	479.333	blue
Nta09g27210	5596.96	3586.84	2010.12	1576.73	blue
Nta10g08850	6271.63	3586.82	2684.81	902.004	blue
Nta12g20750	5608.99	3586.68	2022.31	1564.36	blue
novel.2632	5317.32	3586.65	1730.67	1855.98	blue
Nta04g20940	5275.63	3586.47	1689.16	1897.31	blue
Nta04g30330	6425.88	3586.26	2839.62	746.643	blue
Nta15g12370	5596.71	3585.87	2010.84	1575.04	blue
Nta15g11530	6264.13	3585.73	2678.41	907.322	blue
Nta11g13900	6507.71	3585.49	2922.22	663.278	blue
novel.7681	5441.49	3585.36	1856.14	1729.22	blue
Nta14g13100	6679.86	3584.5	3095.36	489.144	blue
Nta16g12860	5400.88	3584.36	1816.51	1767.85	blue
Nta06g18950	5256.66	3583.41	1673.25	1910.17	blue
Nta17g10920	6682.47	3583.24	3099.23	484.005	blue
Nta06g25780	5718.48	3582.77	2135.71	1447.05	blue
Nta01g02230	5583.48	3582.74	2000.75	1581.99	blue
Nta18g04710	6253.97	3582.31	2671.66	910.642	blue
Nta02g03120	5374.02	3582.3	1791.72	1790.58	blue
Nta02g10040	5257.92	3581.21	1676.71	1904.5	blue
Nta01g01850	6355.4	3580.8	2774.6	806.2	blue
Nta19g13420	6609.98	3580.3	3029.68	550.626	blue
novel.7452	6524	3580.1	2943.9	636.201	blue
Nta16g10960	6700.9	3580.05	3120.86	459.191	blue
Nta13g13900	6409.45	3579.97	2829.48	750.494	blue
Nta12g19410	6208.04	3579.94	2628.1	951.85	blue
Nta21g08350	6545	3579.89	2965.12	614.77	blue
Nta19g06040	6406.6	3578.95	2827.66	751.293	blue
Nta03g00210	6080.81	3578.86	2501.95	1076.91	blue
Nta00g18730	6699.17	3578.74	3120.42	458.319	blue
Nta19g16330	6085.02	3578.23	2506.8	1071.43	blue
Nta01g24960	6543.44	3578.04	2965.4	612.635	blue
Nta05g26290	6663.7	3577.89	3085.8	492.091	blue
Nta11g11510	6638.66	3577.14	3061.53	515.609	blue
Nta03g29920	5546.43	3577.12	1969.31	1607.81	blue
Nta23g22140	5226.29	3576.66	1649.64	1927.02	blue
Nta10g18760	6623.17	3576.43	3046.73	529.703	blue
Nta22g11750	6116.16	3576.22	2539.94	1036.29	blue
Nta02g02560	6429.82	3575.92	2853.9	722.029	blue
Nta12g14080	5282.23	3575.75	1706.47	1869.28	blue
Nta03g07310	6689.55	3575.62	3113.93	461.696	blue
Nta12g17880	5503.78	3575.33	1928.44	1646.89	blue
Nta13g06520	6613.44	3574.96	3038.48	536.488	blue
Nta05g28350	6138.24	3574.85	2563.39	1011.47	blue
novel.3532	6704.68	3574.66	3130.02	444.647	blue
Nta19g05400	5852.79	3574.49	2278.31	1296.18	blue
Nta11g13920	6046.38	3574.22	2472.16	1102.06	blue
Nta12g21460	6499.48	3573.93	2925.55	648.375	blue
Nta01g14430	5632.29	3573.26	2059.03	1514.22	blue
Nta15g11180	5963.84	3573.03	2390.81	1182.22	blue
novel.4578	6297.98	3572.45	2725.53	846.922	blue
Nta20g21170	6071.66	3572.04	2499.62	1072.43	blue
Nta01g02750	6548.69	3570.91	2977.78	593.136	blue
Nta19g16850	6681.11	3570.75	3110.36	460.383	blue
Nta16g08280	5860.47	3570.4	2290.07	1280.33	blue
Nta11g23120	5340.43	3570.27	1770.16	1800.1	blue
Nta10g07880	6680.48	3570.19	3110.29	459.902	blue
novel.3393	5221.53	3569.79	1651.74	1918.05	blue
Nta08g16390	6056.41	3569.79	2486.62	1083.16	blue
Nta02g28120	6445.98	3569.68	2876.3	693.376	blue
Nta18g11240	6448.15	3569.65	2878.5	691.144	blue
Nta05g11530	6316.55	3569.54	2747.01	822.538	blue
Nta11g30340	6708.04	3569.47	3138.57	430.895	blue
Nta11g07600	6121.79	3568.39	2553.4	1014.99	blue
Nta21g16970	6685.24	3567.9	3117.34	450.564	blue
Nta00g09670	5595.22	3567.89	2027.33	1540.56	blue
Nta23g19130	5698.16	3567.85	2130.3	1437.55	blue
Nta11g17130	5375.62	3567.83	1807.79	1760.04	blue
Nta14g03670	5237.82	3567.72	1670.1	1897.62	blue
Nta17g15910	6546.85	3567.49	2979.35	588.141	blue
Nta18g12650	6054.94	3566.58	2488.36	1078.22	blue
Nta19g01100	6578.9	3566.57	3012.33	554.238	blue
Nta08g00060	6626.62	3566.51	3060.12	506.386	blue
Nta03g10980	5549.98	3566.37	1983.61	1582.76	blue
Nta13g11490	5373.26	3566.29	1806.97	1759.32	blue
Nta01g12660	5587.93	3566.1	2021.83	1544.27	blue
Nta14g17820	5422.27	3565.59	1856.68	1708.91	blue
Nta07g19950	5277.93	3565.58	1712.34	1853.24	blue
Nta10g08930	6327.9	3564.47	2763.43	801.034	blue
Nta18g09590	5580.7	3564.19	2016.51	1547.69	blue
Nta02g07920	6235.13	3564	2671.13	892.879	blue
Nta18g01150	6331.77	3563.89	2767.88	796.005	blue
Nta20g08480	5359.01	3563.67	1795.35	1768.32	blue
Nta19g12740	5212.64	3563.66	1648.99	1914.67	blue
Nta01g11600	5207.28	3563.45	1643.83	1919.62	blue
Nta20g17300	5273.66	3563.38	1710.28	1853.1	blue
Nta15g07010	6711.74	3563.34	3148.4	414.936	blue
Nta05g21320	5337.29	3563.05	1774.24	1788.81	blue
novel.1198	5752.69	3562.85	2189.85	1373	blue
Nta05g00990	6407.24	3561.84	2845.4	716.447	blue
Nta07g05160	5956.79	3561.74	2395.05	1166.69	blue
Nta11g19340	5412.53	3561.66	1850.86	1710.8	blue
Nta11g26500	5213.77	3561.54	1652.23	1909.31	blue
Nta01g16180	5200.07	3561.3	1638.77	1922.53	blue
Nta12g03090	6615.06	3561.02	3054.04	506.982	blue
Nta01g07910	5328.47	3560.9	1767.56	1793.34	blue
Nta15g20270	6276.34	3560.89	2715.46	845.428	blue
Nta16g10220	6170.22	3560.87	2609.35	951.522	blue
Nta01g25170	6646.87	3560.5	3086.38	474.118	blue
Nta18g01460	6076.94	3560.31	2516.63	1043.68	blue
Nta04g01880	5261.39	3560.06	1701.33	1858.74	blue
Nta11g13640	6670.04	3560	3110.03	449.973	blue
Nta02g25310	5918.11	3559.95	2358.16	1201.79	blue
Nta17g16950	6444.66	3559.74	2884.91	674.83	blue
Nta01g21090	6395.28	3559.44	2835.84	723.595	blue
Nta05g28520	6714.81	3559.43	3155.38	404.043	blue
Nta03g17200	6576.5	3559.15	3017.35	541.795	blue
Nta04g30340	5806.81	3559.09	2247.72	1311.36	blue
Nta08g01500	6705.57	3558.96	3146.61	412.346	blue
Nta12g00680	6671.24	3558.51	3112.74	445.768	blue
Nta22g05100	5536.3	3558.02	1978.28	1579.73	blue
novel.6744	5287.41	3557.82	1729.59	1828.23	blue
Nta05g22720	6320.23	3557.48	2762.75	794.739	blue
novel.4441	5404.26	3557.29	1846.97	1710.32	blue
Nta09g12390	5729.67	3556.9	2172.77	1384.13	blue
Nta00g08510	5265.24	3556.67	1708.57	1848.1	blue
Nta14g10780	5536.54	3556.6	1979.94	1576.66	blue
Nta04g15940	5193.88	3556.4	1637.49	1918.91	blue
Nta17g08120	6702.91	3555.81	3147.1	408.703	blue
Nta01g28440	6217.04	3555.8	2661.24	894.554	blue
Nta06g25790	5940.66	3555.48	2385.18	1170.3	blue
Nta23g19060	6717.19	3555.19	3162	393.195	blue
Nta16g15680	6709.06	3555.18	3153.88	401.294	blue
Nta19g11590	5789.61	3555.12	2234.48	1320.64	blue
Nta01g01450	6053.35	3555.02	2498.32	1056.7	blue
Nta02g27740	6623.3	3554.92	3068.38	486.539	blue
Nta21g06880	6354.21	3554.81	2799.4	755.404	blue
Nta23g16870	6478.19	3554.7	2923.49	631.209	blue
Nta03g10240	6706.98	3554.52	3152.45	402.068	blue
Nta08g00150	6704.56	3554.28	3150.27	404.01	blue
Nta14g17750	5404.72	3553.92	1850.8	1703.12	blue
Nta15g11560	6562.53	3553.9	3008.63	545.271	blue
Nta02g30310	5190.71	3553.66	1637.05	1916.62	blue
Nta15g15660	6136.55	3553.63	2582.92	970.702	blue
Nta08g02530	5326.72	3553.61	1773.11	1780.5	blue
Nta00g17540	5206.2	3553.44	1652.77	1900.67	blue
Nta24g03280	5525.29	3553.37	1971.91	1581.46	blue
Nta03g14690	5207.43	3553.07	1654.36	1898.71	blue
Nta14g15550	6627.25	3552.69	3074.57	478.119	blue
Nta03g04490	6679.79	3552.46	3127.33	425.124	blue
Nta24g17830	6359.59	3552.39	2807.2	745.189	blue
Nta04g05260	5870.55	3552.37	2318.18	1234.2	blue
Nta03g12630	6698.54	3552.36	3146.18	406.177	blue
novel.5453	5756.65	3552.28	2204.38	1347.9	blue
Nta17g11470	6061.05	3552.18	2508.87	1043.3	blue
Nta24g16520	6651.43	3551.94	3099.49	452.443	blue
Nta17g05780	5769.62	3551.71	2217.91	1333.8	blue
Nta10g19080	5717.19	3551.44	2165.75	1385.69	blue
Nta01g01390	6695.93	3551.24	3144.69	406.555	blue
Nta03g07160	6108.54	3551.02	2557.52	993.495	blue
Nta12g31510	5892.59	3550.49	2342.11	1208.38	blue
Nta09g07650	5521.96	3550.15	1971.8	1578.35	blue
Nta14g05830	5177.34	3550.11	1627.23	1922.88	blue
Nta24g05270	6123.36	3550.03	2573.34	976.691	blue
Nta20g11040	6008.5	3549.88	2458.62	1091.25	blue
Nta15g04130	5445.94	3549.86	1896.08	1653.78	blue
Nta12g01400	6661.3	3549.73	3111.58	438.151	blue
Nta23g12860	5325.36	3549.67	1775.69	1773.98	blue
Nta14g08060	5456.37	3549.19	1907.19	1642	blue
Nta24g01190	5178.29	3549.11	1629.18	1919.93	blue
Nta06g14310	6678.58	3548.74	3129.84	418.899	blue
Nta11g16550	5234.17	3548.69	1685.48	1863.21	blue
Nta01g31070	6322.6	3548.57	2774.02	774.552	blue
Nta17g23010	5176.75	3548.55	1628.2	1920.35	blue
Nta03g27340	5994.37	3547.87	2446.5	1101.37	blue
Nta01g07740	5597.34	3547.26	2050.08	1497.18	blue
Nta03g23460	5295.9	3546.24	1749.66	1796.58	blue
Nta08g14110	6272.18	3546.19	2725.99	820.207	blue
Nta18g17470	6201.23	3546.05	2655.17	890.881	blue
Nta03g28720	5604.9	3545.51	2059.39	1486.12	blue
novel.5285	6707.93	3544.96	3162.98	381.981	blue
Nta22g09290	5447.44	3544.86	1902.57	1642.29	blue
novel.7390	6535.41	3544.47	2990.94	553.536	blue
Nta21g14770	6095.76	3544.39	2551.37	993.025	blue
Nta17g03880	6687	3544.03	3142.97	401.06	blue
novel.5820	6250.17	3543.28	2706.88	836.397	blue
novel.2238	5668.89	3543.13	2125.76	1417.37	blue
Nta09g17760	6141.18	3542.85	2598.33	944.516	blue
novel.2849	6512.74	3542.56	2970.17	572.387	blue
Nta02g29720	6366.65	3542.48	2824.17	718.306	blue
Nta15g10990	6656.54	3542.34	3114.19	428.15	blue
Nta16g02230	6414.14	3542.11	2872.03	670.078	blue
novel.4434	6511.61	3540.99	2970.62	570.378	blue
Nta09g11990	5177.59	3540.41	1637.18	1903.23	blue
Nta09g18790	6726.36	3540.36	3186	354.355	blue
Nta17g24950	6089.31	3539.92	2549.39	990.531	blue
Nta16g18610	5678.28	3539.66	2138.62	1401.04	blue
Nta01g32420	5167.15	3539.01	1628.14	1910.86	blue
Nta10g21920	6157.26	3538.84	2618.42	920.424	blue
Nta08g02620	6717.22	3538.74	3178.47	360.269	blue
Nta01g14760	5175.96	3538.39	1637.57	1900.81	blue
Nta02g32460	5534.91	3538.16	1996.75	1541.4	blue
Nta02g11830	5661.33	3538.06	2123.27	1414.79	blue
Nta11g10620	6231.06	3537.87	2693.2	844.671	blue
Nta08g16650	5472.44	3537.86	1934.58	1603.28	blue
Nta05g14050	5848.63	3537.45	2311.18	1226.27	blue
Nta10g16000	6015.86	3537.23	2478.64	1058.59	blue
Nta01g01590	6506.19	3536.95	2969.24	567.718	blue
Nta11g20470	6249.08	3536.8	2712.28	824.521	blue
novel.560	5213.52	3536.69	1676.83	1859.85	blue
Nta14g19450	5160.16	3536.42	1623.74	1912.68	blue
Nta02g30080	6725.64	3535.91	3189.73	346.176	blue
Nta11g08060	6275.17	3535.9	2739.27	796.631	blue
Nta20g06510	5181.55	3535.62	1645.93	1889.69	blue
Nta13g21160	5158.34	3535.56	1622.78	1912.78	blue
Nta18g09370	6702.92	3535.18	3167.75	367.426	blue
Nta11g15450	6292.75	3534.84	2757.91	776.932	blue
Nta07g00160	6679.45	3534.45	3145	389.455	blue
novel.7883	5733.84	3534.39	2199.45	1334.94	blue
Nta16g01650	6730.51	3533.83	3196.68	337.151	blue
Nta23g23230	6433.75	3533.01	2900.74	632.274	blue
novel.1271	6434.56	3532.59	2901.97	630.626	blue
Nta04g15290	5176.63	3532.26	1644.37	1887.89	blue
Nta10g21980	6387.08	3532.08	2855.01	677.069	blue
Nta02g02880	5183.11	3531.45	1651.66	1879.79	blue
Nta10g16400	5163.58	3530.03	1633.55	1896.47	blue
Nta03g31360	6733.18	3529.96	3203.23	326.733	blue
Nta01g01070	5927.36	3529.73	2397.63	1132.09	blue
Nta24g19300	6345.32	3529.38	2815.95	713.432	blue
Nta07g20870	6505.19	3529.11	2976.08	553.031	blue
Nta02g21330	5140.88	3528.48	1612.4	1916.08	blue
Nta11g15020	6332.58	3527.92	2804.66	723.261	blue
Nta23g21340	5142.55	3526.83	1615.72	1911.11	blue
Nta03g16040	6721.84	3526.72	3195.12	331.599	blue
Nta09g12190	6328.48	3526.57	2801.91	724.664	blue
Nta07g19690	6418.34	3526.53	2891.81	634.713	blue
Nta07g05710	6591.57	3524.88	3066.68	458.202	blue
Nta03g02070	5132.6	3524.74	1607.85	1916.89	blue
Nta20g08680	6716.95	3524.47	3192.48	331.994	blue
Nta04g29340	5279.98	3524.42	1755.55	1768.87	blue
Nta01g09310	6394.16	3523.54	2870.62	652.913	blue
Nta08g13720	5511.9	3523.21	1988.69	1534.52	blue
Nta20g06190	6416.31	3522.31	2894	628.309	blue
Nta21g07170	6674.51	3522.31	3152.2	370.106	blue
Nta24g13770	6681.29	3522.01	3159.28	362.729	blue
Nta07g15490	6720.31	3521.7	3198.6	323.101	blue
Nta11g00600	5423.17	3521.26	1901.91	1619.35	blue
Nta19g03380	6738.81	3520.45	3218.36	302.09	blue
Nta08g08860	6509.31	3519.96	2989.35	530.61	blue
Nta12g05000	5972.17	3519.96	2452.22	1067.74	blue
Nta06g15380	6262.41	3519.73	2742.68	777.052	blue
novel.1543	6183.59	3519.45	2664.14	855.317	blue
Nta16g07900	6690.66	3519.45	3171.21	348.239	blue
Nta02g11380	5999.81	3519.43	2480.38	1039.05	blue
Nta10g22570	6000.74	3519.37	2481.37	1038	blue
Nta12g16430	5229.81	3519.36	1710.44	1808.92	blue
Nta05g11030	6636.29	3519.09	3117.2	401.884	blue
Nta09g00920	6444.86	3519.07	2925.79	593.285	blue
Nta05g30880	5189.7	3518.73	1670.97	1847.76	blue
Nta18g21140	6429.48	3518.11	2911.37	606.745	blue
Nta04g33310	6738.88	3518.03	3220.84	297.193	blue
Nta01g29150	5702.13	3517.92	2184.21	1333.71	blue
Nta10g18550	6028.83	3517.46	2511.37	1006.1	blue
Nta04g15670	5929.97	3517.15	2412.82	1104.32	blue
Nta05g20030	6250.93	3516.91	2734.02	782.897	blue
Nta01g15700	6408.99	3516.86	2892.13	624.732	blue
Nta03g22660	6128.9	3516.62	2612.27	904.354	blue
Nta04g04860	6389.7	3516.52	2873.17	643.349	blue
Nta16g24800	6575.08	3516.26	3058.82	457.436	blue
Nta17g03230	6292.8	3516.07	2776.73	739.336	blue
novel.2048	5165.95	3515.99	1649.96	1866.04	blue
Nta22g10680	5447.78	3515.85	1931.93	1583.92	blue
Nta11g03830	6596.07	3515.36	3080.71	434.647	blue
Nta04g19100	6418.83	3514.9	2903.93	610.969	blue
Nta05g22600	5824.32	3514.28	2310.04	1204.25	blue
Nta07g18820	6724.46	3514.24	3210.22	304.011	blue
Nta02g28540	5746.16	3514.18	2231.98	1282.19	blue
novel.7509	6350.93	3513.86	2837.07	676.795	blue
Nta09g19230	5284.86	3513.77	1771.09	1742.68	blue
novel.4677	6695.46	3513.38	3182.08	331.301	blue
Nta02g01480	6705.09	3511.3	3193.78	317.516	blue
Nta14g02480	5871.81	3510.86	2360.94	1149.92	blue
Nta04g18260	5877.43	3510.38	2367.06	1143.32	blue
Nta06g17850	5106.98	3510.33	1596.66	1913.67	blue
Nta09g19460	6432.4	3510.07	2922.33	587.743	blue
Nta04g26620	6717.12	3510.04	3207.08	302.962	blue
Nta15g24510	6724.29	3509.17	3215.13	294.042	blue
novel.4041	6713.2	3508.83	3204.36	304.467	blue
Nta17g09370	6606.21	3508.61	3097.59	411.019	blue
Nta05g28950	5802.52	3508.39	2294.13	1214.26	blue
Nta21g17070	6510.02	3507.58	3002.44	505.134	blue
Nta06g15510	6675.39	3507.43	3167.96	339.469	blue
Nta07g02900	6254.91	3507.4	2747.51	759.896	blue
Nta07g07710	5790.61	3507.33	2283.28	1224.05	blue
Nta01g02580	6709.18	3506.19	3202.99	303.203	blue
Nta16g20220	6664.15	3506.18	3157.98	348.202	blue
Nta11g16270	6745.38	3506.08	3239.3	266.781	blue
Nta05g05130	5201.44	3505.96	1695.48	1810.48	blue
Nta11g07970	6127.96	3505.95	2622.01	883.937	blue
Nta06g09020	5153.79	3505.23	1648.55	1856.68	blue
Nta10g04570	6446.23	3504.88	2941.36	563.52	blue
Nta18g11620	6042.89	3504.61	2538.28	966.328	blue
Nta24g12860	5979.99	3504.61	2475.38	1029.23	blue
Nta12g35690	6724.3	3504.33	3219.97	284.358	blue
Nta12g19040	6739.54	3504.05	3235.49	268.561	blue
Nta06g29310	6587.54	3503.75	3083.79	419.959	blue
Nta07g15220	6151.75	3503.48	2648.26	855.22	blue
Nta19g11470	5639.03	3503.34	2135.69	1367.65	blue
Nta14g04620	6636.44	3503.17	3133.27	369.908	blue
Nta04g29420	6209.61	3502.68	2706.93	795.749	blue
Nta23g16330	6166.39	3502.4	2663.99	838.406	blue
Nta02g04390	6495.31	3502.22	2993.09	509.136	blue
Nta22g16400	6587.91	3502.11	3085.8	416.315	blue
Nta24g06150	6167.75	3502.07	2665.68	836.382	blue
Nta15g07150	5567.17	3501.97	2065.2	1436.77	blue
Nta12g26990	6723.27	3501.72	3221.55	280.17	blue
Nta16g04790	6447.62	3501.45	2946.17	555.282	blue
novel.104	6247.09	3501.42	2745.67	755.758	blue
Nta23g05480	6532.87	3501.06	3031.8	469.262	blue
Nta06g01130	6149.74	3500.95	2648.79	852.162	blue
Nta04g16990	5235.28	3500.77	1734.5	1766.27	blue
Nta02g29530	5351.22	3500.73	1850.49	1650.24	blue
novel.5817	6191.1	3500.52	2690.58	809.942	blue
Nta02g31810	5476.89	3500.3	1976.58	1523.72	blue
Nta13g08150	5113.35	3500.15	1613.2	1886.96	blue
Nta08g22430	6536.21	3499.82	3036.39	463.428	blue
Nta24g04370	6263.88	3499.54	2764.33	735.208	blue
Nta01g26630	6448.95	3498.81	2950.14	548.671	blue
Nta24g15320	6266.92	3498.55	2768.38	730.168	blue
Nta10g13870	6613.39	3498.44	3114.95	383.499	blue
Nta17g00470	5759.82	3498.22	2261.6	1236.63	blue
Nta06g06230	5312.35	3497.88	1814.47	1683.42	blue
Nta00g10490	5292.44	3497.34	1795.1	1702.24	blue
Nta12g32940	6084.64	3496.96	2587.68	909.275	blue
Nta05g02780	5101.85	3496.95	1604.9	1892.06	blue
Nta07g21050	6749.37	3496.94	3252.43	244.506	blue
Nta07g09850	5092.55	3496.62	1595.93	1900.69	blue
Nta04g33980	6690.89	3495.62	3195.27	300.345	blue
Nta16g00890	5124.65	3495.1	1629.55	1865.56	blue
Nta10g03060	5083.84	3495.05	1588.79	1906.26	blue
Nta06g24460	6015.31	3495.01	2520.3	974.705	blue
Nta12g32560	6736.04	3494.76	3241.28	253.472	blue
Nta11g13570	6562.35	3494.56	3067.78	426.78	blue
Nta16g13650	5440.52	3494.32	1946.2	1548.12	blue
Nta20g09360	6753.15	3494.16	3259	235.157	blue
Nta06g26930	5201.79	3493.69	1708.1	1785.59	blue
Nta22g02080	5934.18	3493.39	2440.8	1052.59	blue
novel.1871	6449.91	3493.06	2956.85	536.211	blue
Nta10g22350	6137.59	3493.02	2644.57	848.446	blue
Nta24g15560	5292.17	3492.41	1799.76	1692.65	blue
Nta04g24410	5226.14	3491.78	1734.36	1757.42	blue
Nta11g21860	5308.55	3491.75	1816.79	1674.96	blue
Nta20g10750	6542.97	3491.73	3051.24	440.485	blue
novel.655	5134.08	3491.42	1642.66	1848.77	blue
Nta17g02140	6750	3491.38	3258.63	232.751	blue
Nta10g09700	6754.43	3491.35	3263.08	228.271	blue
Nta08g18550	6172.96	3490.42	2682.54	807.877	blue
Nta06g13200	6121.23	3490.06	2631.17	858.9	blue
Nta18g23900	6406.17	3489.47	2916.69	572.779	blue
novel.3159	5214.63	3488.5	1726.13	1762.37	blue
Nta20g10840	5412.97	3488.38	1924.59	1563.79	blue
Nta12g25710	5139.7	3488.21	1651.5	1836.71	blue
Nta10g07090	5858.63	3488.08	2370.55	1117.52	blue
novel.7581	6691.77	3487.99	3203.78	284.211	blue
Nta02g00510	6726.23	3487.02	3239.21	247.804	blue
Nta11g18420	5913.08	3486.61	2426.46	1060.15	blue
Nta10g20350	6650.24	3486.43	3163.8	322.633	blue
Nta08g03120	6755.55	3486.41	3269.14	217.269	blue
Nta09g19490	5892.23	3486.17	2406.06	1080.1	blue
Nta20g10640	6162.6	3485.73	2676.87	808.852	blue
Nta01g29090	6570.42	3484.88	3085.53	399.348	blue
Nta16g05790	6393.04	3484.84	2908.2	576.643	blue
Nta01g04370	6323.78	3484.39	2839.38	645.013	blue
Nta11g26590	5565.73	3484.2	2081.53	1402.67	blue
Nta17g25310	5062	3484.07	1577.93	1906.15	blue
novel.1334	6402.09	3484	2918.1	565.901	blue
novel.3728	5205.35	3483.59	1721.76	1761.82	blue
Nta14g00790	6617.41	3483.29	3134.12	349.174	blue
Nta11g08490	5234.54	3483.24	1751.31	1731.93	blue
Nta17g15670	6247.09	3483.22	2763.88	719.341	blue
Nta02g24440	5063.69	3482.99	1580.7	1902.3	blue
Nta04g09710	6748.11	3482.93	3265.19	217.74	blue
Nta05g03960	5114.94	3482.65	1632.29	1850.36	blue
Nta18g21020	5239.54	3482.49	1757.05	1725.44	blue
Nta01g28070	6750.99	3482.48	3268.51	213.965	blue
Nta23g22910	5157.24	3482.32	1674.92	1807.4	blue
Nta16g14340	5105.75	3481.66	1624.09	1857.57	blue
Nta16g24450	6000.46	3481.62	2518.84	962.779	blue
Nta12g20930	5059.06	3481.45	1577.62	1903.83	blue
Nta16g16340	5910.82	3480.29	2430.53	1049.76	blue
Nta11g17040	5107.36	3480.17	1627.19	1852.99	blue
Nta03g11610	5496.87	3480.03	2016.84	1463.2	blue
Nta04g16630	5792.96	3479.65	2313.31	1166.34	blue
novel.5749	5797.95	3478.7	2319.24	1159.46	blue
Nta09g02390	6312.68	3478.63	2834.06	644.568	blue
Nta09g19600	5398.89	3478.16	1920.73	1557.43	blue
Nta10g23460	6704.24	3478.12	3226.11	252.01	blue
Nta07g10400	6662.43	3477.24	3185.19	292.049	blue
Nta16g05890	6685.12	3477.18	3207.94	269.248	blue
Nta05g22700	5676.08	3476.49	2199.59	1276.9	blue
Nta12g18700	5972.11	3476.43	2495.68	980.745	blue
Nta01g08470	6758.37	3476.31	3282.06	194.249	blue
Nta18g02200	5150.39	3476.06	1674.32	1801.74	blue
Nta10g18670	5276.38	3475.44	1800.94	1674.5	blue
Nta15g10670	6351.37	3475.13	2876.24	598.893	blue
Nta02g26800	6763.42	3475.02	3288.4	186.616	blue
novel.7679	5490.18	3473.85	2016.34	1457.51	blue
Nta20g07420	6139.57	3473.39	2666.18	807.21	blue
Nta01g15750	5081.38	3472.69	1608.69	1863.99	blue
Nta16g15360	6630.05	3472.61	3157.44	315.175	blue
Nta18g20990	6113.49	3472.54	2640.96	831.582	blue
Nta18g09520	6605.56	3472.49	3133.08	339.41	blue
Nta02g01140	6663.88	3472.39	3191.49	280.904	blue
Nta09g20970	6764.9	3472.36	3292.53	179.833	blue
Nta05g00570	6353.42	3472.16	2881.25	590.91	blue
Nta11g11240	5375.6	3472.01	1903.59	1568.41	blue
Nta18g03120	6754.94	3471.51	3283.43	188.075	blue
Nta01g17030	6754.39	3471.42	3282.97	188.445	blue
Nta11g08010	5627.36	3470.59	2156.76	1313.83	blue
novel.1609	6438.97	3470.48	2968.49	501.983	blue
Nta13g22560	6256.02	3469.63	2786.39	683.246	blue
Nta04g15550	5051.49	3469.56	1581.93	1887.63	blue
Nta02g14610	6519.32	3469.14	3050.18	418.957	blue
Nta15g27400	6667.8	3468.81	3198.98	269.828	blue
Nta18g05840	5800.77	3468.56	2332.21	1136.34	blue
novel.194	5036.29	3468.12	1568.17	1899.96	blue
Nta19g00280	5057.12	3467.66	1589.45	1878.21	blue
Nta04g17810	6458.71	3467.12	2991.59	475.535	blue
Nta15g25530	6546.7	3466.94	3079.76	387.179	blue
Nta14g21130	5284.67	3466.85	1817.82	1649.04	blue
Nta16g24200	6613.92	3466.68	3147.23	319.452	blue
Nta11g00510	6749.96	3466.58	3283.38	183.198	blue
Nta05g06540	5663.01	3466.39	2196.61	1269.78	blue
Nta15g27870	6009.95	3466.29	2543.66	922.63	blue
Nta07g17400	5472.09	3466.22	2005.87	1460.35	blue
Nta19g06810	6461.36	3466.09	2995.26	470.827	blue
Nta10g20990	5667.91	3466.09	2201.82	1264.27	blue
Nta16g23640	6325.8	3465.77	2860.02	605.753	blue
Nta13g09590	6767.98	3465.24	3302.74	162.499	blue
Nta14g19490	5347.09	3465.14	1881.94	1583.2	blue
Nta06g19890	5091.05	3465.1	1625.95	1839.16	blue
novel.3287	6624.61	3464.27	3160.34	303.929	blue
novel.3183	6505.01	3463.97	3041.03	422.939	blue
Nta14g21940	5253.19	3463.85	1789.34	1674.52	blue
Nta11g13490	6768.55	3463.68	3304.87	158.807	blue
Nta07g03950	5061.89	3463.42	1598.46	1864.96	blue
Nta15g07130	6373.19	3462.94	2910.25	552.695	blue
Nta09g14070	5766.41	3462.7	2303.72	1158.98	blue
Nta11g21240	6060.57	3461.82	2598.75	863.07	blue
Nta17g09530	5658.85	3461.67	2197.17	1264.5	blue
Nta13g22960	5047.96	3461.51	1586.45	1875.06	blue
Nta20g08710	5097.49	3461.49	1636	1825.48	blue
Nta05g29940	6769.24	3461.39	3307.86	153.532	blue
Nta09g13370	5104.91	3461.21	1643.7	1817.5	blue
Nta21g01810	5227.65	3461.08	1766.57	1694.51	blue
Nta11g09160	5769.69	3460.95	2308.74	1152.22	blue
novel.1891	5052.69	3459.96	1592.73	1867.23	blue
Nta01g31760	5318.67	3459.92	1858.75	1601.18	blue
Nta18g03170	6004.15	3459.88	2544.27	915.613	blue
Nta04g07500	5022.37	3459.79	1562.58	1897.21	blue
Nta19g15450	6596.65	3459.69	3136.96	322.734	blue
Nta08g18650	5026.55	3459.26	1567.29	1891.98	blue
Nta09g22820	6707.23	3458.88	3248.35	210.53	blue
Nta18g06440	6568.94	3458.31	3110.63	347.684	blue
Nta20g02100	6025.86	3458.2	2567.66	890.546	blue
novel.1777	6293.94	3458.08	2835.86	622.221	blue
novel.4032	6766.79	3458.03	3308.76	149.272	blue
novel.647	6527.02	3457.97	3069.05	388.922	blue
Nta08g11970	6169.3	3457.93	2711.37	746.558	blue
Nta04g10970	6008.64	3457.17	2551.47	905.697	blue
Nta06g30430	5884.96	3457.02	2427.94	1029.08	blue
Nta01g14250	6757.85	3457	3300.85	156.151	blue
Nta01g21140	6769.82	3456.95	3312.87	144.076	blue
Nta12g31140	6630.15	3456.93	3173.23	283.699	blue
novel.215	6439.15	3456.82	2982.32	474.501	blue
Nta02g28720	6483.29	3456.69	3026.6	430.091	blue
Nta19g03630	6556.56	3456.63	3099.93	356.697	blue
Nta02g06540	6724.4	3456.54	3267.86	188.678	blue
Nta05g22440	6241.77	3455.76	2786	669.76	blue
novel.6134	5894.78	3455.28	2439.5	1015.78	blue
novel.4240	6670.39	3454.77	3215.63	239.141	blue
novel.419	5529.96	3454.19	2075.76	1378.43	blue
Nta18g12110	5962.35	3454.1	2508.24	945.86	blue
Nta01g17150	5085.08	3454.1	1630.98	1823.13	blue
Nta06g16170	6731.06	3454.03	3277.03	177.006	blue
novel.5602	6763.94	3453.84	3310.1	143.739	blue
novel.3963	6224.47	3452.94	2771.53	681.414	blue
Nta02g25120	6678.03	3452.89	3225.14	227.749	blue
Nta24g17260	6579.38	3452.67	3126.71	325.958	blue
novel.6091	5348.47	3452.36	1896.11	1556.25	blue
novel.763	5007.1	3451.07	1556.03	1895.04	blue
novel.2720	6476.62	3450.83	3025.79	425.042	blue
Nta19g24050	5819.03	3450.74	2368.29	1082.45	blue
Nta13g16700	5143.63	3450.67	1692.96	1757.71	blue
Nta02g00500	6543.32	3450.17	3093.14	357.027	blue
Nta01g26300	6564.74	3450.16	3114.58	335.581	blue
Nta18g05590	5867.47	3449.95	2417.52	1032.43	blue
Nta09g21130	6067.48	3449.92	2617.56	832.356	blue
Nta06g14760	6469.74	3449.53	3020.21	429.313	blue
Nta07g18660	6225.78	3449.46	2776.32	673.136	blue
Nta04g30450	5827.75	3449.37	2378.38	1070.99	blue
Nta12g21930	6718.96	3449.03	3269.93	179.102	blue
Nta24g13780	6533.81	3448.2	3085.61	362.592	blue
Nta04g03570	6641.33	3448.13	3193.2	254.923	blue
Nta07g04170	5397.64	3448.05	1949.6	1498.45	blue
novel.6379	5408.86	3447.75	1961.12	1486.63	blue
Nta04g03950	5387.11	3447.34	1939.77	1507.57	blue
Nta13g22890	5582.46	3446.97	2135.49	1311.47	blue
Nta09g08350	5070.49	3446.93	1623.56	1823.37	blue
Nta07g04390	6116.46	3446.85	2669.6	777.248	blue
Nta05g25610	5939.04	3446.54	2492.5	954.039	blue
Nta18g20860	5302.77	3446.2	1856.57	1589.64	blue
Nta02g09860	6746.66	3445.97	3300.7	145.269	blue
Nta12g33740	5492.39	3445.95	2046.44	1399.5	blue
Nta24g10700	5753.13	3445.82	2307.31	1138.52	blue
Nta13g09970	6353.36	3445.79	2907.57	538.22	blue
Nta04g20570	6773.05	3445.75	3327.3	118.45	blue
Nta17g07010	6634.55	3445.68	3188.87	256.802	blue
Nta01g01130	5588.81	3445.19	2143.61	1301.58	blue
Nta11g23880	5338.08	3445.13	1892.95	1552.18	blue
Nta06g25650	6100.77	3445.02	2655.75	789.264	blue
Nta08g19190	5184.71	3444.61	1740.1	1704.51	blue
Nta11g27240	5274.39	3444.48	1829.91	1614.56	blue
Nta09g24180	6764.48	3444.3	3320.18	124.122	blue
Nta06g20750	6476.1	3443.25	3032.85	410.395	blue
novel.737	5947.44	3442.89	2504.55	938.331	blue
Nta02g04340	6779.19	3442.63	3336.55	106.082	blue
Nta05g19870	6397.23	3441.98	2955.25	486.734	blue
Nta01g16990	6669.43	3441.13	3228.3	212.833	blue
Nta24g11780	6539.39	3441.02	3098.38	342.638	blue
Nta23g22940	5056.55	3440.71	1615.84	1824.87	blue
Nta11g11210	6050.92	3440.33	2610.59	829.745	blue
Nta04g30600	6250.69	3439.85	2810.85	629.002	blue
novel.4023	5963.82	3439.59	2524.23	915.36	blue
Nta05g30450	6141.68	3439.28	2702.41	736.867	blue
Nta01g20400	6562.23	3439.25	3122.99	316.26	blue
Nta01g13520	6768.38	3438.82	3329.56	109.256	blue
Nta09g16200	6672.22	3438.75	3233.46	205.291	blue
Nta07g22320	6753.59	3438.38	3315.22	123.163	blue
Nta15g06800	5730.78	3438.16	2292.62	1145.53	blue
Nta03g12260	5353.32	3438.1	1915.22	1522.88	blue
Nta18g02470	5197.89	3438.05	1759.84	1678.22	blue
Nta02g03580	5297.42	3437.61	1859.81	1577.8	blue
Nta07g23750	5759.02	3437.12	2321.89	1115.23	blue
novel.3182	5090.19	3437.02	1653.16	1783.86	blue
Nta19g12210	5754.01	3436.97	2317.04	1119.93	blue
Nta24g14120	5248.47	3436.84	1811.62	1625.22	blue
Nta12g15980	6235.47	3436.77	2798.7	638.069	blue
Nta18g15470	5061.14	3436.38	1624.76	1811.62	blue
Nta13g16890	5204.58	3436.37	1768.21	1668.15	blue
Nta07g00030	6680.35	3436.32	3244.02	192.297	blue
Nta17g13890	5784.67	3436.31	2348.36	1087.95	blue
Nta18g19040	5737.81	3435.29	2302.52	1132.77	blue
Nta07g16730	6137.16	3435.11	2702.05	733.053	blue
novel.1478	5805.49	3434.89	2370.61	1064.28	blue
Nta04g06590	4985.51	3434.83	1550.68	1884.16	blue
Nta16g01730	5556.95	3434.35	2122.6	1311.76	blue
novel.5738	6676.31	3434.19	3242.12	192.076	blue
Nta20g10310	4982.49	3433.7	1548.79	1884.91	blue
Nta08g12730	6633.48	3433.59	3199.88	233.712	blue
Nta12g05040	6430.84	3433.15	2997.7	435.448	blue
Nta22g10090	5194.68	3433.01	1761.67	1671.34	blue
Nta11g01200	5560.11	3432.81	2127.3	1305.52	blue
Nta12g05670	4987.06	3432.36	1554.69	1877.67	blue
novel.5930	5237.8	3432.29	1805.51	1626.77	blue
Nta03g10830	6232.56	3432.11	2800.46	631.651	blue
Nta24g05010	6668.97	3431.83	3237.15	194.683	blue
Nta04g01720	6777.04	3431.2	3345.85	85.3519	blue
novel.4120	6168.25	3431.09	2737.16	693.928	blue
Nta03g11400	5758.69	3431.06	2327.62	1103.44	blue
Nta08g13440	6331.37	3430.91	2900.46	530.451	blue
Nta04g07680	5013.23	3430.89	1582.34	1848.54	blue
Nta11g28990	6783.19	3430.7	3352.49	78.2095	blue
Nta06g19750	6163	3430.42	2732.58	697.845	blue
Nta19g06150	5335.39	3430.3	1905.09	1525.21	blue
Nta08g13370	6081.23	3430.04	2651.19	778.851	blue
Nta20g17000	5296.12	3430	1866.12	1563.89	blue
Nta10g01910	6369.86	3429.87	2939.99	489.878	blue
Nta07g16340	4970.27	3428.53	1541.75	1886.78	blue
Nta14g14420	6435.25	3428.08	3007.17	420.917	blue
Nta23g01240	6531.13	3427.74	3103.39	324.345	blue
Nta04g11710	5786.21	3427.72	2358.49	1069.23	blue
Nta23g05420	5185.74	3427.31	1758.43	1668.89	blue
Nta08g10380	5519.28	3427.31	2091.97	1335.35	blue
Nta13g08290	6045.59	3427.02	2618.57	808.446	blue
novel.1990	6013.79	3426.96	2586.83	840.123	blue
Nta09g06460	6250.17	3426.86	2823.31	603.542	blue
Nta07g24490	6770.98	3426.52	3344.46	82.0549	blue
Nta04g00640	6744.96	3425.88	3319.09	106.788	blue
Nta13g19060	6771.2	3425.72	3345.48	80.2375	blue
Nta04g04480	6695.36	3425.47	3269.9	155.571	blue
Nta15g17300	6786.87	3425.46	3361.41	64.0494	blue
novel.3233	5302.26	3425.3	1876.96	1548.33	blue
Nta02g09750	6711.11	3425.16	3285.95	139.218	blue
Nta09g23020	6512.41	3425.09	3087.32	337.764	blue
Nta01g10690	6250.28	3424.98	2825.3	599.672	blue
Nta09g22910	5815.51	3424.91	2390.59	1034.32	blue
Nta18g18680	6705.94	3424.4	3281.54	142.864	blue
Nta17g05820	5001.82	3423.64	1578.17	1845.47	blue
Nta22g17740	6751.42	3422.99	3328.43	94.5551	blue
Nta10g20570	5808.02	3422.18	2385.83	1036.35	blue
Nta11g00020	5693.15	3422.12	2271.03	1151.09	blue
Nta16g25020	5389.3	3421.21	1968.1	1453.11	blue
Nta06g24360	5570.93	3421.13	2149.8	1271.34	blue
Nta04g27210	5636.5	3421.04	2215.46	1205.58	blue
novel.183	4972.3	3420.97	1551.33	1869.64	blue
Nta18g17080	6247.24	3420.95	2826.29	594.657	blue
Nta09g18370	6482.49	3420.24	3062.25	357.993	blue
Nta22g04950	5351.41	3419.81	1931.6	1488.22	blue
Nta15g12270	6697.03	3419.22	3277.81	141.416	blue
Nta17g04890	6488.74	3418.19	3070.55	347.638	blue
Nta04g32370	5406.47	3418.05	1988.42	1429.63	blue
Nta11g29500	5910.48	3417.63	2492.85	924.77	blue
Nta05g09700	5086.16	3417.26	1668.9	1748.36	blue
Nta24g10740	5068.23	3417.24	1650.99	1766.25	blue
Nta23g22300	6578.85	3417.24	3161.61	255.628	blue
novel.5978	5477.88	3416.93	2060.95	1355.98	blue
Nta12g01520	4965.42	3416.87	1548.55	1868.32	blue
Nta16g03600	6615.95	3416.85	3199.09	217.76	blue
Nta02g27170	6526.45	3416.65	3109.8	306.848	blue
Nta19g12230	6586.38	3415.85	3170.53	245.326	blue
Nta06g12480	6355.24	3415.67	2939.56	476.112	blue
novel.8188	6671.69	3415.6	3256.09	159.511	blue
Nta08g16350	5862.51	3415.19	2447.32	967.866	blue
Nta10g02200	6648.59	3412.83	3235.76	177.072	blue
Nta23g18520	5880.48	3412.38	2468.1	944.283	blue
novel.2341	5040.67	3412.37	1628.3	1784.07	blue
Nta03g15640	5044.95	3412.1	1632.85	1779.24	blue
Nta00g12940	5374.68	3411.84	1962.84	1449	blue
Nta08g00140	6256.88	3411.71	2845.16	566.549	blue
Nta15g25710	5000.48	3411.65	1588.83	1822.82	blue
Nta23g10380	6513.8	3411.41	3102.39	309.017	blue
Nta03g27760	6723.2	3411.31	3311.89	99.4154	blue
Nta07g24230	6601.42	3411.29	3190.13	221.158	blue
Nta09g20480	6376.35	3411.25	2965.11	446.143	blue
Nta00g03670	6756.28	3410.85	3345.44	65.4142	blue
Nta23g14880	5204.75	3410.63	1794.12	1616.51	blue
Nta23g21240	5059.88	3410.32	1649.57	1760.75	blue
Nta04g19170	6211.14	3409.69	2801.44	608.25	blue
Nta05g31330	6774.45	3409.4	3365.04	44.3612	blue
Nta03g11740	5496.05	3409.08	2086.97	1322.11	blue
Nta23g04780	6640.2	3408.79	3231.42	177.371	blue
novel.7292	6757.38	3408.57	3348.81	59.7546	blue
novel.4307	6549.35	3408.19	3141.16	267.026	blue
Nta15g06200	6108.88	3407.54	2701.34	706.204	blue
Nta14g15910	5553.83	3407.08	2146.75	1260.34	blue
novel.7088	5052.54	3406.71	1645.83	1760.88	blue
Nta18g21900	5621.96	3406.6	2215.36	1191.24	blue
Nta09g18050	6150.57	3406.53	2744.04	662.494	blue
Nta16g05170	4954.82	3406.29	1548.52	1857.77	blue
Nta08g13620	5839.03	3405.26	2433.76	971.503	blue
Nta13g12020	6762.67	3404.78	3357.89	46.8904	blue
Nta01g28050	5725.22	3404.55	2320.67	1083.88	blue
Nta17g11980	5632.42	3404.49	2227.93	1176.55	blue
Nta14g04530	6464.81	3403.65	3061.16	342.49	blue
Nta23g16880	6421.82	3403.4	3018.42	384.987	blue
Nta16g26030	5671.43	3403.27	2268.16	1135.11	blue
Nta01g11080	6204.89	3403.21	2801.68	601.53	blue
Nta01g01830	5812.37	3402.79	2409.57	993.223	blue
Nta12g35650	6709.87	3402.37	3307.51	94.8578	blue
Nta06g24670	6621.77	3402.19	3219.59	182.597	blue
Nta15g13890	6750.85	3402.15	3348.7	53.452	blue
Nta12g27220	5089.92	3402.02	1687.9	1714.12	blue
Nta10g01520	6791.1	3401.85	3389.25	12.5929	blue
Nta23g10550	6774.81	3401.62	3373.19	28.4269	blue
Nta03g31150	4997.38	3401.58	1595.8	1805.78	blue
Nta00g12750	6570.53	3401.44	3169.09	232.345	blue
Nta22g06220	6607.85	3400.67	3207.18	193.489	blue
Nta15g03400	4958.28	3400.6	1557.68	1842.92	blue
Nta12g29600	4927.83	3400.21	1527.63	1872.58	blue
Nta11g01060	5004.36	3399.98	1604.38	1795.61	blue
Nta15g17310	4980.31	3399.85	1580.45	1819.4	blue
Nta04g22590	5816.27	3399.64	2416.63	983.014	blue
Nta20g12740	4999.21	3399.44	1599.76	1799.68	blue
Nta22g15090	5098.86	3399.08	1699.78	1699.3	blue
Nta14g15020	6106.42	3398.91	2707.51	691.398	blue
Nta21g08400	5696.57	3398.82	2297.75	1101.07	blue
Nta03g04030	6313.41	3398.47	2914.94	483.534	blue
Nta18g15140	5131.7	3398.34	1733.37	1664.97	blue
Nta05g21790	6790.75	3398.17	3392.58	5.59122	blue
Nta07g16840	6555.37	3397.63	3157.74	239.894	blue
Nta08g11100	6667.26	3397.4	3269.86	127.541	blue
Nta02g18750	6756.04	3397.23	3358.81	38.4195	blue
novel.1822	5148.2	3397.23	1750.97	1646.26	blue
Nta08g12940	5839.36	3397.11	2442.25	954.851	blue
Nta09g21100	5964.54	3397.05	2567.49	829.553	blue
Nta02g27340	5066.23	3396.71	1669.52	1727.19	blue
Nta12g34070	6724.57	3396.7	3327.87	68.8377	blue
Nta04g24610	5064.44	3396.65	1667.79	1728.86	blue
Nta21g15400	6317.99	3396.56	2921.43	475.132	blue
Nta20g11420	5525.88	3396.39	2129.49	1266.9	blue
Nta24g08670	6258.35	3396.08	2862.27	533.817	blue
novel.4518	4933.81	3395.94	1537.88	1858.06	blue
Nta19g02900	5694.99	3395.33	2299.66	1095.68	blue
Nta07g01860	5021.95	3395.28	1626.67	1768.61	blue
Nta10g01340	6795.57	3395.23	3400.34	-5.10419	blue
novel.4691	4989.72	3395.14	1594.58	1800.56	blue
Nta23g04940	6669.63	3395.03	3274.6	120.426	blue
Nta15g12450	6742.51	3394.62	3347.89	46.7296	blue
Nta04g22000	6592.86	3394.43	3198.43	196.005	blue
Nta04g13370	5783.58	3393.23	2390.34	1002.89	blue
Nta15g07390	6722.45	3393	3329.45	63.5552	blue
Nta21g07380	4941.97	3392.88	1549.08	1843.8	blue
novel.2691	5078.53	3392.58	1685.95	1706.64	blue
novel.8097	5165.09	3392.56	1772.53	1620.02	blue
Nta07g03000	5511.7	3392.23	2119.48	1272.75	blue
Nta07g19050	6735.85	3392.18	3343.66	48.519	blue
novel.4425	5613.91	3392	2221.9	1170.1	blue
Nta02g05140	6639.47	3391.94	3247.53	144.402	blue
Nta18g07360	6160.6	3391.69	2768.91	622.786	blue
Nta21g16490	5049.21	3391.37	1657.84	1733.53	blue
Nta03g12300	6486.74	3390.96	3095.78	295.187	blue
novel.6603	6800.89	3390.49	3410.41	-19.924	blue
Nta09g14430	5266.64	3390.12	1876.52	1513.59	blue
Nta12g26860	5341.75	3390.03	1951.73	1438.3	blue
Nta02g04600	5599.03	3389.78	2209.25	1180.53	blue
Nta08g13930	5982.18	3389.7	2592.47	797.23	blue
Nta06g02310	6802.08	3389.53	3412.56	-23.0282	blue
Nta12g06840	4949.62	3389.29	1560.33	1828.95	blue
Nta20g12310	5896.85	3389.12	2507.73	881.395	blue
Nta13g03380	5856.79	3389.04	2467.75	921.287	blue
Nta13g10290	5297.74	3388.59	1909.15	1479.44	blue
novel.6179	4908.03	3388.18	1519.85	1868.33	blue
Nta09g00910	6799.67	3388.15	3411.52	-23.37	blue
Nta24g03920	4949.98	3388.12	1561.86	1826.26	blue
Nta13g04080	6419.43	3387.78	3031.65	356.128	blue
Nta01g15310	6548.52	3387.58	3160.94	226.646	blue
Nta03g19890	5589.44	3387.51	2201.93	1185.57	blue
Nta00g12810	6582.08	3387.02	3195.06	191.962	blue
Nta02g02820	5281.45	3387.01	1894.44	1492.57	blue
Nta03g28310	5839.86	3386.85	2453.02	933.83	blue
novel.4006	6752.86	3386.34	3366.53	19.8127	blue
Nta12g09200	6145.61	3386.25	2759.36	626.883	blue
Nta02g08700	6733.34	3385.63	3347.71	37.9153	blue
Nta19g00520	6353.96	3385.62	2968.35	417.27	blue
Nta06g11430	6648.72	3385.27	3263.45	121.828	blue
Nta05g19090	5498.89	3384.77	2114.11	1270.66	blue
Nta04g27360	5658.61	3384.62	2273.99	1110.63	blue
Nta03g18390	5355.37	3383.34	1972.03	1411.32	blue
Nta21g10300	5396.59	3382.98	2013.61	1369.37	blue
Nta01g25590	6595.21	3382.74	3212.47	170.265	blue
Nta10g16840	5707.84	3382.47	2325.37	1057.1	blue
Nta03g11010	6152.42	3382.43	2769.99	612.446	blue
Nta00g15360	5046.52	3382.26	1664.26	1718	blue
Nta09g26700	6753.02	3382.19	3370.84	11.3515	blue
Nta04g32000	5583.67	3381.47	2202.21	1179.26	blue
Nta06g02640	6016.28	3381.44	2634.85	746.59	blue
Nta15g16040	6044.08	3380.58	2663.5	717.071	blue
Nta22g10880	6135.54	3380.26	2755.28	624.977	blue
Nta01g32510	4893.41	3380.23	1513.18	1867.05	blue
Nta00g08160	6805.71	3379.91	3425.79	-45.8827	blue
Nta16g22140	6693.59	3379.69	3313.89	65.7976	blue
Nta22g14660	5120.04	3379.6	1740.44	1639.16	blue
Nta13g18290	6446.01	3379.51	3066.5	313.008	blue
Nta20g05500	6757.58	3379.45	3378.12	1.32603	blue
Nta03g03590	5305.78	3378.91	1926.87	1452.03	blue
Nta18g23150	6569.12	3378.85	3190.27	188.586	blue
Nta12g14150	5439.87	3377.5	2062.37	1315.14	blue
Nta02g14490	4887.8	3377.26	1510.53	1866.73	blue
Nta19g24010	6059.79	3376.88	2682.91	693.964	blue
novel.6862	4979.38	3376.81	1602.57	1774.25	blue
Nta20g21930	6096.78	3376.21	2720.58	655.633	blue
Nta01g28420	5634.86	3375.92	2258.94	1116.98	blue
Nta23g23130	5199.59	3375.7	1823.89	1551.8	blue
Nta00g01610	5747.64	3374.12	2373.52	1000.61	blue
Nta12g05290	6537.71	3373.79	3163.92	209.865	blue
Nta05g17900	5642.82	3373.77	2269.06	1104.71	blue
Nta13g09650	6180.32	3373.71	2806.61	567.102	blue
Nta22g16340	5411.37	3373.56	2037.81	1335.75	blue
Nta20g17470	6108.97	3373.36	2735.61	637.755	blue
Nta22g16020	5708.72	3373.3	2335.43	1037.87	blue
Nta18g21130	5798.95	3372.97	2425.98	946.988	blue
Nta08g02390	5456.72	3372.86	2083.86	1289	blue
Nta17g08990	6787.18	3372.34	3414.83	-42.4873	blue
Nta03g00380	6793.84	3372	3421.84	-49.834	blue
Nta09g13750	4987.34	3371.98	1615.36	1756.61	blue
Nta17g09450	5597.76	3371.93	2225.82	1146.11	blue
Nta06g04050	4884.1	3371.09	1513	1858.09	blue
Nta04g05320	6366.92	3371.07	2995.85	375.215	blue
Nta02g09830	4945.97	3371.01	1574.97	1796.04	blue
Nta17g11160	6664.63	3370.94	3293.69	77.2488	blue
Nta06g15720	5096.98	3370.77	1726.21	1644.55	blue
novel.6031	5362.97	3370.75	1992.22	1378.52	blue
Nta01g17000	6173.54	3369.86	2803.68	566.178	blue
Nta02g12190	5325.95	3369.1	1956.85	1412.25	blue
novel.1107	6580.01	3368.24	3211.76	156.477	blue
Nta20g04950	5045.3	3368.19	1677.11	1691.08	blue
Nta21g05380	4986.78	3368.07	1618.71	1749.37	blue
Nta03g21610	6406.21	3368.03	3038.19	329.84	blue
Nta01g06960	4943.69	3366.93	1576.76	1790.18	blue
Nta01g25580	6494.55	3366.79	3127.75	239.038	blue
Nta17g09900	5796.96	3366.6	2430.36	936.244	blue
Nta04g29370	6576.36	3366.54	3209.82	156.718	blue
Nta05g03900	5333.37	3366.32	1967.06	1399.26	blue
Nta21g05700	6292.12	3366.23	2925.88	440.352	blue
Nta14g21700	5578.98	3365.86	2213.12	1152.75	blue
Nta23g10480	6642.83	3365.74	3277.09	88.6554	blue
Nta15g10890	6670.29	3365.71	3304.58	61.1292	blue
Nta24g20230	5057.87	3365.7	1692.18	1673.52	blue
Nta19g12340	6588.45	3365.7	3222.75	142.948	blue
Nta04g12040	5528.5	3365.58	2162.92	1202.67	blue
Nta23g21600	5561.09	3365.35	2195.74	1169.6	blue
novel.1046	5169.47	3365	1804.47	1560.53	blue
Nta24g00390	5386.39	3364.98	2021.41	1343.57	blue
Nta06g16840	4902.02	3364.63	1537.39	1827.24	blue
Nta13g20990	5004.63	3364.59	1640.04	1724.55	blue
Nta14g05270	6810.19	3364.34	3445.85	-81.5158	blue
novel.178	6794.06	3363.09	3430.96	-67.8715	blue
Nta03g05540	6645.46	3362.7	3282.76	79.9371	blue
Nta12g07820	6297.78	3361.74	2936.04	425.708	blue
Nta15g27550	6660.25	3361	3299.25	61.7543	blue
Nta11g18700	5412.25	3360.86	2051.39	1309.47	blue
Nta10g16640	4863.55	3360.77	1502.78	1858	blue
novel.8251	6028.45	3360.22	2668.23	691.982	blue
Nta13g05930	4882.1	3359.98	1522.12	1837.85	blue
Nta04g24150	6067.19	3359.95	2707.24	652.715	blue
novel.5427	5882.76	3359.89	2522.88	837.013	blue
Nta06g17990	5213.58	3359.74	1853.85	1505.89	blue
Nta13g09880	6335.28	3359.44	2975.84	383.603	blue
Nta03g28160	5781.15	3359.34	2421.8	937.538	blue
Nta07g19290	6797.52	3359.18	3438.35	-79.1673	blue
novel.5792	6610.26	3358.98	3251.28	107.701	blue
Nta14g00730	6801.18	3358.91	3442.27	-83.3679	blue
Nta20g03520	6751.4	3358.61	3392.8	-34.1942	blue
Nta06g21990	6781.14	3358.59	3422.55	-63.959	blue
Nta05g15990	6779.02	3357.67	3421.35	-63.6795	blue
Nta16g23130	6805.2	3357.5	3447.7	-90.1949	blue
Nta01g15510	6080.8	3357.46	2723.34	634.112	blue
Nta06g20520	6324.36	3356.87	2967.49	389.378	blue
Nta17g12380	6506.95	3355.41	3151.54	203.873	blue
Nta05g17830	5367.49	3355.38	2012.11	1343.27	blue
Nta12g04200	5245.69	3354.91	1890.78	1464.13	blue
Nta05g21860	5764.74	3354.7	2410.03	944.669	blue
Nta01g28960	6780.19	3354.5	3425.7	-71.1976	blue
Nta02g27160	6400.78	3354.12	3046.66	307.464	blue
Nta12g15520	6704.07	3353.96	3350.11	3.84336	blue
Nta13g21740	4906.64	3353.91	1552.73	1801.17	blue
Nta03g21380	6779.5	3353.33	3426.17	-72.835	blue
Nta02g19240	6790.36	3353.24	3437.12	-83.8808	blue
Nta02g24320	5390.19	3352.87	2037.32	1315.55	blue
Nta08g02850	6193.17	3352.81	2840.37	512.438	blue
Nta18g10930	5453.39	3352.68	2100.71	1251.97	blue
Nta02g33030	5104.21	3352.58	1751.63	1600.95	blue
novel.2438	5929.09	3351.65	2577.44	774.204	blue
Nta22g07010	5741.29	3351.59	2389.7	961.892	blue
Nta13g03760	6301.78	3351.39	2950.4	400.988	blue
Nta15g13670	6244.76	3351.28	2893.48	457.8	blue
Nta08g20440	6271.31	3351.2	2920.11	431.093	blue
Nta19g04960	6786.33	3350.72	3435.61	-84.8879	blue
Nta17g10670	6438.79	3350.67	3088.12	262.545	blue
Nta03g24390	5135.65	3350.54	1785.11	1565.43	blue
Nta10g02740	6534.67	3350.17	3184.5	165.663	blue
Nta03g28980	6677.86	3349.63	3328.24	21.3891	blue
Nta17g13570	6493.42	3349.28	3144.15	205.127	blue
novel.8129	6788.62	3348.81	3439.81	-91.0054	blue
novel.6242	5828.93	3348.76	2480.17	868.589	blue
Nta10g21760	6817.23	3348.12	3469.1	-120.983	blue
Nta11g13940	6629.66	3348.1	3281.56	66.5441	blue
Nta12g17000	6518.59	3348.07	3170.52	177.548	blue
Nta12g25830	6426.09	3347.77	3078.32	269.456	blue
Nta08g14850	6631.88	3347.38	3284.5	62.8853	blue
Nta07g01000	6780.59	3347.36	3433.23	-85.8719	blue
Nta16g02640	6551.52	3347.13	3204.39	142.745	blue
Nta15g11840	6452.4	3347.13	3105.28	241.85	blue
Nta16g09750	6484.16	3346.93	3137.23	209.698	blue
Nta21g11460	6354.31	3346.84	3007.47	339.368	blue
Nta07g12180	5859.71	3346.01	2513.7	832.311	blue
Nta02g14080	5813.75	3345.09	2468.66	876.434	blue
Nta14g16050	4882.37	3344.95	1537.42	1807.54	blue
Nta01g07650	5699.18	3344.86	2354.32	990.547	blue
Nta10g02720	6136.99	3344.76	2792.23	552.535	blue
Nta12g14860	4836.67	3344.45	1492.22	1852.23	blue
Nta05g28970	6512.75	3344.37	3168.38	175.989	blue
novel.4690	5209.13	3344.34	1864.79	1479.56	blue
Nta07g11120	6522.01	3344.24	3177.77	166.464	blue
Nta04g04700	6628.44	3343.97	3284.47	59.5017	blue
Nta01g04650	4879.38	3343.44	1535.94	1807.5	blue
Nta09g12130	5075.51	3343.28	1732.23	1611.05	blue
Nta13g00100	5280.69	3343.22	1937.47	1405.75	blue
Nta16g16180	6667.51	3342.88	3324.63	18.2497	blue
Nta23g09530	5116.34	3342.71	1773.62	1569.09	blue
Nta16g07530	5198.6	3342.62	1855.99	1486.63	blue
Nta02g15260	5469.73	3342.56	2127.18	1215.38	blue
Nta22g04270	6280.72	3342.36	2938.36	404.001	blue
novel.3491	5292.95	3342.23	1950.72	1391.51	blue
Nta23g19040	4836.38	3341.94	1494.44	1847.51	blue
Nta01g33550	5908.02	3341.87	2566.16	775.714	blue
Nta04g00380	6814.38	3341.75	3472.63	-130.875	blue
Nta10g23250	6674.51	3341.51	3333	8.51604	blue
novel.3896	5491.37	3341.37	2149.99	1191.38	blue
Nta03g17250	5267.2	3340.6	1926.61	1413.99	blue
Nta01g22890	4862.98	3340.44	1522.54	1817.9	blue
Nta05g09210	6434.5	3340.23	3094.27	245.964	blue
Nta01g02180	4882.07	3340.08	1541.98	1798.1	blue
novel.7272	6141.19	3339.73	2801.46	538.269	blue
Nta17g24090	6814.3	3339.63	3474.67	-135.048	blue
Nta01g10910	5894.53	3339.35	2555.18	784.172	blue
Nta06g07990	6189.63	3339.1	2850.53	488.575	blue
Nta08g16140	5554.29	3338.82	2215.47	1123.35	blue
Nta13g08030	5902.37	3338.65	2563.72	774.927	blue
Nta18g02920	6814.77	3338.25	3476.52	-138.272	blue
Nta16g08900	6734.78	3338.02	3396.77	-58.7527	blue
Nta16g12750	4828.57	3337.58	1490.99	1846.58	blue
Nta08g08640	5688.56	3337.4	2351.16	986.241	blue
Nta02g04100	4826.66	3337.02	1489.64	1847.38	blue
Nta11g17770	5984.28	3336.45	2647.82	688.629	blue
Nta19g12650	4911.61	3336.24	1575.36	1760.88	blue
Nta01g15350	5506.63	3336.22	2170.41	1165.81	blue
Nta12g28170	4881.57	3336.07	1545.5	1790.57	blue
Nta07g13940	4864.32	3335.66	1528.66	1807	blue
novel.1168	6253.22	3335.48	2917.74	417.743	blue
Nta17g08300	5189.79	3334.63	1855.16	1479.47	blue
Nta01g33530	6753.97	3333.78	3420.2	-86.4171	blue
Nta14g01310	6173.88	3333.7	2840.18	493.514	blue
Nta13g07410	6303.59	3333.48	2970.11	363.371	blue
Nta02g04030	6226.44	3333.27	2893.17	440.101	blue
novel.3067	6509.02	3333.15	3175.87	157.283	blue
Nta13g21830	4919.62	3332.72	1586.9	1745.82	blue
Nta06g11890	5181.84	3332.65	1849.19	1483.45	blue
Nta14g16510	5538.66	3331.57	2207.09	1124.47	blue
[truncated: 23,002 more rows]

## Sheet:  Supplementary Table 3
Supplementary Table 3 Correlation Analysis Between Transcriptomes and Metabolomes of YY vs HD
metabolite	Gene	corr	pvalue
4-Hydroxyestrone sulfate	Nta01g32550	-0.940594	5.27141e-06
Domperidone	Nta01g32550	-0.926617	1.48037e-05
Tinosinenside	Nta01g32550	-0.912603	3.46256e-05
Chloriolide	Nta01g32550	0.914282	3.1516e-05
GLY-GLY-ILE	Nta01g32550	0.970048	1.80554e-07
Pterocellin F	Nta01g32550	-0.889283	0.000108504
H-ILE-TRP-OH	Nta01g32550	0.95245	1.76716e-06
Rutaevin	Nta01g32550	-0.926916	1.45119e-05
Ser Ser Ile	Nta01g32550	0.985804	4.43308e-09
Trp Gly	Nta01g32550	0.874798	0.000195641
Citrifolinin B epimer b	Nta01g32550	-0.834509	0.000735215
beta-Alanyl-L-arginine	Nta01g32550	0.958651	8.8798e-07
Ketobemidone	Nta01g32550	0.693578	0.0123647
Jatamanvaltrate H	Nta01g32550	-0.856917	0.000369583
Tetradecyl iodide	Nta01g32550	-0.94199	4.6913e-06
Acetyl tributyl citrate	Nta01g32550	0.793367	0.00207263
Phenylalanylserine	Nta01g32550	0.837749	0.000669853
DIMBOA-Glc	Nta01g32550	-0.905518	5.0506e-05
2',3'-Dideoxyadenosine	Nta01g32550	-0.91195	3.58978e-05
H-TRP-ALA-OH	Nta01g32550	0.888621	0.000111657
Anthothecanolide	Nta01g32550	-0.920999	2.12011e-05
Pulcherrin C	Nta01g32550	-0.927779	1.36947e-05
Alnustone	Nta01g32550	-0.965647	3.55692e-07
Phe Gly Ile	Nta01g32550	0.980688	2.04827e-08
Tinocordiside	Nta01g32550	-0.927955	1.35331e-05
lysine tyrosylquinone	Nta01g32550	0.844852	0.000542311
2-OH-C16 :0 Ceramide	Nta01g32550	0.931231	1.07839e-05
Coumanolignan	Nta01g32550	-0.840429	0.00061928
Pyramidatin D	Nta01g32550	0.884752	0.000131559
5'-N-Methylcarboxamidoadenosine	Nta01g32550	0.980313	2.25344e-08
Lysylphenylalanine	Nta01g32550	0.838823	0.000649224
Lys Ile Ile	Nta01g32550	0.961744	6.05099e-07
5,8-Dimethoxymaculine	Nta01g32550	-0.851946	0.000434579
Valyllysine	Nta01g32550	0.990536	5.88596e-10
Phe-Asn	Nta01g32550	0.966788	3.00957e-07
Ala Leu Leu	Nta01g32550	0.93561	7.81906e-06
(+)-argemonine	Nta01g32550	-0.819271	0.00111144
Plagiospirolide E	Nta01g32550	-0.806153	0.00154109
Ala Gly Leu	Nta01g32550	0.791963	0.00213856
Nordihydrocapsaicin	Nta01g32550	0.951158	2.01629e-06
Dimethoxane	Nta01g32550	-0.972498	1.18324e-07
His Glu Asn	Nta01g32550	-0.859848	0.000334975
Ser Ile Phe	Nta01g32550	0.963747	4.6406e-07
Cuspidiol	Nta01g32550	-0.88974	0.00010637
Cheiradone	Nta01g32550	-0.915317	2.97126e-05
(2R,3R)-3-Methylglutamyl-5-semialdehyde-N6-lysine	Nta01g32550	0.97629	5.67096e-08
tryptoquialanol	Nta01g32550	-0.821015	0.00106214
beta-Aflatrem	Nta01g32550	0.93325	9.32337e-06
Asp Val Leu	Nta01g32550	0.905777	4.9841e-05
Leu-Val-Ser	Nta01g32550	0.969497	1.97584e-07
Arg Leu	Nta01g32550	0.795108	0.00199299
LysoPE(20:4)	Nta01g32550	0.894031	8.78732e-05
Thr Leu Thr	Nta01g32550	0.939257	5.87807e-06
H-LEU-LEU-GLY-OH	Nta01g32550	0.946362	3.19427e-06
Thr-Trp	Nta01g32550	0.979812	2.55305e-08
Lactulose	Nta01g32550	-0.871493	0.000221576
Gabaculine	Nta01g32550	-0.846487	0.000515818
Histidylleucine	Nta01g32550	0.974217	8.5939e-08
11beta,13-dihydrolactucin 15-oxalate	Nta01g32550	0.857325	0.000364609
Gly Phe Val	Nta01g32550	0.843677	0.000561988
(R)-(Homo)3-citrate	Nta01g32550	-0.903048	5.72179e-05
L-Alanyl-L-proline	Nta01g32550	0.869036	0.000242539
Leu-Ala-Ser	Nta01g32550	0.971225	1.48049e-07
Ile Ile Asp	Nta01g32550	0.859246	0.000341869
Trp-Ala-Gly	Nta01g32550	0.818344	0.00113834
Asn Val Leu	Nta01g32550	0.918115	2.52382e-05
Pandangolide 1	Nta01g32550	0.956604	1.12677e-06
(-)-7-Hydroxylariciresinol 9'-p-coumarate	Nta01g32550	-0.851872	0.0004356
(+)-8-Acetoxycarvone	Nta01g32550	0.870503	0.000229849
3-Oxo-11,13(18)-oleandien-28-oic acid	Nta01g32550	-0.805952	0.00154852
gamma-Hydroxy-3-pyridinebutanoate	Nta01g32550	-0.881404	0.000150928
H-MET-MET-OH	Nta01g32550	-0.852031	0.000433393
Phe Gly	Nta01g32550	0.843499	0.00056501
3-Hydroxybibenzyl	Nta01g32550	-0.843971	0.000557004
Papuanone	Nta01g32550	0.862841	0.000302286
HQNO	Nta01g32550	0.593688	0.0418311
4'-Hydroxy-3,5,8,3'-tetramethoxy-7-prenyloxyflavone	Nta01g32550	-0.845617	0.000529783
PMEG	Nta01g32550	-0.80905	0.00143677
Cysteinylglycine	Nta01g32550	-0.799113	0.00181878
Arteannuin B	Nta01g32550	-0.895662	8.15462e-05
Brachystemidine B	Nta01g32550	-0.936705	7.1901e-06
(S)-Furanopetasitin	Nta01g32550	-0.948732	2.5587e-06
Tetrahydrocurcumin	Nta01g32550	-0.884801	0.000131291
Dictamnoside L	Nta01g32550	-0.893124	9.15531e-05
Asp Thr Leu	Nta01g32550	0.879835	0.000160736
Crispine A	Nta01g32550	0.571432	0.0522684
Chlorochrymorin	Nta01g32550	-0.93481	8.30557e-06
2-Oxoglutarate	Nta01g32550	-0.932656	9.73595e-06
Aminobutyl benzamide	Nta01g32550	0.878337	0.000170561
Glucovanillin	Nta01g32550	-0.854341	0.000402235
Leu Leu Gln	Nta01g32550	0.86761	0.000255389
Ghalakinoside	Nta01g32550	-0.874658	0.000196691
Alanylhydroxyproline	Nta01g32550	0.901109	6.29608e-05
Phe-arg	Nta01g32550	0.821346	0.00105299
Catalpol	Nta01g32550	-0.847861	0.000494346
Val Asp Leu	Nta01g32550	0.891561	9.8179e-05
Salbostatin	Nta01g32550	-0.889542	0.000107289
Cholestenone	Nta01g32550	-0.874434	0.000198377
3-Hydroxyhippuric acid	Nta01g32550	-0.867162	0.000259538
Dendromoniliside A	Nta01g32550	-0.907584	4.53825e-05
Evocalcet	Nta01g32550	0.890948	0.000100881
Lophanthoidin F	Nta01g32550	0.96875	2.22715e-07
Dictyoquinazol A	Nta01g32550	0.953832	1.52843e-06
Leu-Thr-Ser	Nta01g32550	0.956092	1.19379e-06
Thr Leu Ile	Nta01g32550	0.930528	1.13332e-05
N-Acetyl-glutamine	Nta01g32550	0.757065	0.00435777
Ser Ile Ala	Nta01g32550	0.851265	0.000444131
H-Leu-Asn-OH	Nta01g32550	0.837454	0.000675612
Acanthoglabrolide	Nta01g32550	-0.87751	0.000176185
Rehmannioside C	Nta01g32550	-0.850408	0.000456381
Anthosterone B	Nta01g32550	-0.876453	0.00018358
Ala-Leu-Leu-Asp	Nta01g32550	0.937144	6.94926e-06
Ancistrogriffithine A	Nta01g32550	-0.957383	1.03054e-06
Ingenol Mebutate	Nta01g32550	0.986341	3.65921e-09
PYRAOXYSTROBIN	Nta01g32550	-0.839751	0.000631784
Tryptophyl-Isoleucine	Nta01g32550	0.924676	1.68115e-05
Pro Ile Ala	Nta01g32550	0.923961	1.76026e-05
Ile Glu Leu	Nta01g32550	0.871604	0.000220667
Triptofordin D 1	Nta01g32550	-0.915233	2.98545e-05
Ala Leu Glu	Nta01g32550	0.884802	0.000131285
p-Menth-1-ene-3,4-diol 4-O-beta-glucopyranoside	Nta01g32550	0.989151	1.1625e-09
Obliquine	Nta01g32550	0.951	2.04846e-06
Tiruchanduramine	Nta01g32550	-0.823569	0.000993028
Genipin	Nta01g32550	-0.815717	0.00121734
6beta-Hydroxyhuperzine A	Nta01g32550	-0.852647	0.000424901
Atractyloside A	Nta01g32550	-0.777278	0.00292866
Ser Leu Ile	Nta01g32550	0.80293	0.00166386
Formylfusarochromanone	Nta01g32550	-0.886032	0.000124693
Astellolide B	Nta01g32550	-0.894439	8.62561e-05
zinolol	Nta01g32550	-0.859177	0.000342668
Tyr Leu	Nta01g32550	0.879888	0.000160401
Verbenalin	Nta01g32550	-0.914565	3.10139e-05
Ixoside	Nta01g32550	-0.94703	3.00369e-06
Phe-Ala-Gly	Nta01g32550	0.910864	3.80969e-05
DL-Leucyl-DL-phenylalanine	Nta01g32550	0.918444	2.47498e-05
Ile Ile	Nta01g32550	0.842856	0.000576059
Glidobactin D	Nta01g32550	-0.887609	0.00011662
Val Ile Leu	Nta01g32550	0.964744	4.04329e-07
Met Leu	Nta01g32550	0.918624	2.44856e-05
Phe-Ala-Asp	Nta01g32550	0.78495	0.0024923
Terragine E	Nta01g32550	0.862912	0.000301539
Picfeltarraenin IB	Nta01g32550	0.743983	0.0055298
Succinylaminoimidazole carboxamide riboside	Nta01g32550	-0.916814	2.72467e-05
Isothalicrine	Nta01g32550	0.968808	2.2067e-07
Ascochalasin	Nta01g32550	-0.821759	0.00104163
Thr Glu	Nta01g32550	0.961239	6.45611e-07
Asp-Trp	Nta01g32550	0.709147	0.00980934
Garajonone	Nta01g32550	-0.841235	0.000604648
Eriotriochin	Nta01g32550	-0.798569	0.00184174
Ala-Leu-Val-Ser	Nta01g32550	0.942668	4.42884e-06
Nitropyrrolin D	Nta01g32550	0.624127	0.0300736
D-Phe-Pro-Arg-CH2Cl	Nta01g32550	0.857364	0.000364133
Circinamide	Nta01g32550	0.921172	2.09758e-05
Spinanine A	Nta01g32550	-0.801835	0.00170722
1,3-Dihydroxy-1-(4-hydroxy-3,5-dimethoxyphenyl)propan-2-one	Nta01g32550	-0.848389	0.000486276
H-Val-Tyr-OH	Nta01g32550	0.778689	0.00284431
1-Methyl-2-hydroadenosine	Nta01g32550	0.868497	0.000247339
3-(4-hydroxy-3-methoxyphenyl)propanoate	Nta01g32550	-0.938031	6.48254e-06
Glu-Ile-Val	Nta01g32550	0.905977	4.93314e-05
Asn-Tyr	Nta01g32550	0.923978	1.75841e-05
TXB1	Nta01g32550	-0.862631	0.000304494
Consabatine	Nta01g32550	0.667037	0.0178134
3-Hydroxy-prazepam	Nta01g32550	-0.894343	8.6634e-05
Ile Phe Asp	Nta01g32550	0.895427	8.24355e-05
Lys Val Leu	Nta01g32550	0.960303	7.26249e-07
Repandin D	Nta01g32550	-0.81346	0.0012885
3-Methyldioxyindole	Nta01g32550	-0.884168	0.00013479
6-O-Veratroylcatalpol	Nta01g32550	0.860864	0.000323578
(+)-7alpha,8alpha-Epoxyblumenol B	Nta01g32550	0.89586	8.08019e-05
Euperfolitin	Nta01g32550	-0.836993	0.000684696
Phenylalanyltryptophan	Nta01g32550	0.961351	6.36473e-07
Syringopicroside	Nta01g32550	-0.842926	0.000574845
Lysylserine	Nta01g32550	0.931621	1.04888e-05
Leu-Thr-Ala	Nta01g32550	0.937315	6.85725e-06
Oxostephamiersine	Nta01g32550	-0.761211	0.00402892
Esculin	Nta01g32550	-0.854467	0.000400587
Etravirine	Nta01g32550	0.801852	0.00170655
Madecassoside	Nta01g32550	-0.878198	0.000171497
Aucubin	Nta01g32550	-0.906304	4.85077e-05
Cenocladamide	Nta01g32550	-0.883961	0.000135947
L-Leucyl-L-alanine	Nta01g32550	0.76463	0.00377216
Eletriptan	Nta01g32550	-0.878488	0.000169551
Stachyline D	Nta01g32550	0.824091	0.000979312
Corchoionoside C	Nta01g32550	-0.86318	0.000298742
Val Arg	Nta01g32550	0.899072	6.94725e-05
Glu-Asp-Ile	Nta01g32550	0.936088	7.53907e-06
Salvadione C	Nta01g32550	0.79513	0.00199203
Diprotin A	Nta01g32550	0.923597	1.80174e-05
Javanicoside B	Nta01g32550	-0.874257	0.000199719
Gardenoside	Nta01g32550	-0.907261	4.61556e-05
Isostephodeline	Nta01g32550	-0.827719	0.000888148
Ile Pro Val	Nta01g32550	0.813383	0.00129097
Kahakamide A	Nta01g32550	-0.842092	0.000589403
Toddaliopsin A	Nta01g32550	-0.881913	0.000147849
Aminophenazone	Nta01g32550	0.731202	0.00689029
His Phe	Nta01g32550	0.967576	2.67292e-07
Cardiospermin	Nta01g32550	-0.879135	0.00016527
Allopurinol riboside	Nta01g32550	-0.762468	0.00393298
H-Ser-Leu-OH	Nta01g32550	0.795844	0.00196008
Stilbostemin H 3'-beta-D-glucopyranoside	Nta01g32550	-0.919506	2.32221e-05
(+)-Galwesine	Nta01g32550	0.803076	0.00165814
1beta-(3-Hydroxy-4,5-dimethoxyphenyl)-O-glucopyranoside	Nta01g32550	-0.907298	4.60663e-05
Bistratamide B	Nta01g32550	-0.890646	0.000102231
Cedryl acetate	Nta01g32550	0.757938	0.00428687
Litsenolide C1	Nta01g32550	0.868127	0.000250673
Myrothenone A	Nta01g32550	-0.878538	0.000169221
Trichodepsipeptide A	Nta01g32550	-0.886438	0.000122575
Melampodinin B	Nta01g32550	0.867105	0.000260068
Ser Ile Ser	Nta01g32550	0.926385	1.50332e-05
Barlerin	Nta01g32550	-0.856263	0.000377672
Glu Glu Ile	Nta01g32550	0.970301	1.73124e-07
(-)-Taylorione	Nta01g32550	-0.844917	0.000541235
S-Adenosyl-L-methionine	Nta01g32550	0.886347	0.000123047
Chaetoquadrin E	Nta01g32550	0.914934	3.03694e-05
Methyl gallate 3-O-beta-D-glucopyranoside	Nta01g32550	-0.881686	0.000149215
7-Oxostaurosporine	Nta01g32550	-0.914847	3.0521e-05
Isoleucine	Nta01g32550	0.803568	0.00163898
Phenylalanylalanine	Nta01g32550	0.964681	4.07877e-07
Arg Val Leu	Nta01g32550	0.968445	2.33667e-07
alcaligin	Nta01g32550	0.870769	0.000227601
Methyl syringate	Nta01g32550	0.939513	5.75807e-06
Tuliposide A	Nta01g32550	-0.819141	0.00111518
Latrunculin B	Nta01g32550	-0.860554	0.000327023
13(S)-HODE	Nta01g32550	0.774113	0.00312466
Leu-Asp-Ser	Nta01g32550	0.82487	0.000959161
Isochondrodendrine	Nta01g32550	0.898367	7.18466e-05
4-Methylantirrhinoside	Nta01g32550	-0.90168	6.12244e-05
Guineamide D	Nta01g32550	-0.887111	0.000119121
Anagliptin	Nta01g32550	0.711567	0.0094506
H-PHE-LEU-OH	Nta01g32550	0.809161	0.00143287
Stellatoside B	Nta01g32550	-0.850337	0.000457408
Leu Ala Lys	Nta01g32550	0.95507	1.33694e-06
Pipacycline	Nta01g32550	-0.722705	0.00792439
ent-15-Kaurene-17,19-dioic acid	Nta01g32550	0.90768	4.51548e-05
Lappaol D	Nta01g32550	-0.835141	0.000722103
Rossicasin A	Nta01g32550	-0.710899	0.00954874
Pro Arg Leu	Nta01g32550	0.947104	2.98334e-06
cis-(Homo)3-aconitate	Nta01g32550	-0.852877	0.000421773
Chabrolol B	Nta01g32550	0.87569	0.000189065
PA(22:5(7Z,10Z,13Z,16Z,19Z)/15:0)	Nta01g32550	0.764514	0.00378068
(+)-Quebrachidine	Nta01g32550	0.777143	0.00293681
Irisoquin	Nta01g32550	0.929875	1.18626e-05
Dehydrooreadone	Nta01g32550	-0.865637	0.000274047
Valtrate hydrine B3	Nta01g32550	-0.795748	0.00196435
Paulownioside	Nta01g32550	-0.959998	7.54147e-07
6-O-(4-Hydroxybenzoyl)-ajugol	Nta01g32550	0.92049	2.18739e-05
Pharboside G	Nta01g32550	0.752066	0.00478091
Clindamycin	Nta01g32550	0.870676	0.000228385
5'-Methylthioadenosine	Nta01g32550	0.79693	0.00191223
Indole-3-acetaldoxime	Nta01g32550	-0.941933	4.71398e-06
(R)-2-Hydroxy-7,8-dimethoxy-2H-1,4-benzoxazin-3(4H)-one 2-glucoside	Nta01g32550	-0.961594	6.16922e-07
(R)-8-Methylsulfinyloctyl isothiocyanate	Nta01g32550	-0.849665	0.000467211
Spongianolide E	Nta01g32550	-0.872752	0.000211398
Glu-Ile-Ser	Nta01g32550	0.863483	0.000295616
Irisoid E	Nta01g32550	0.907248	4.61874e-05
Lysylglutamic acid	Nta01g32550	0.849004	0.000477009
Benzoylagmatine	Nta01g32550	-0.957275	1.04348e-06
Leuhistin	Nta01g32550	0.890991	0.000100688
1-Benzylpiperazine	Nta01g32550	-0.854389	0.000401612
L-Xylulose	Nta01g32550	-0.878707	0.000168096
DG(18:4(6Z,9Z,12Z,15Z)/15:0/0:0)	Nta01g32550	0.931875	1.02995e-05
Dahuribirin F	Nta01g32550	-0.862792	0.000302796
(-)-Chrysogine	Nta01g32550	-0.818823	0.00112438
Nanjiol B	Nta01g32550	-0.90149	6.17993e-05
beta-fenchocamphorone	Nta01g32550	-0.926836	1.45888e-05
Garenoxacin	Nta01g32550	-0.868145	0.000250509
Curcumol	Nta01g32550	-0.878033	0.000172612
Hyperoside	Nta01g32550	0.781453	0.00268453
pre-putrebactin	Nta01g32550	0.949567	2.36037e-06
7-Methoxy-1,2,3,4-tetrahydroacridin-9-amine	Nta01g32550	0.922778	1.89768e-05
Cryptophorine	Nta01g32550	-0.737254	0.00621799
Stachysoside A	Nta01g32550	-0.886141	0.000124117
DG(PGD2/0:0/i-18:0)	Nta01g32550	0.953821	1.53019e-06
H-MET-TRP-OH	Nta01g32550	0.936423	7.34823e-06
Mallotophenone	Nta01g32550	-0.923443	1.81939e-05
H-LEU-LEU-ALA-OH	Nta01g32550	0.874457	0.000198205
Ramiprilat	Nta01g32550	0.866933	0.000261681
1-Hydroxycarvedilol	Nta01g32550	0.735229	0.00643716
N-Benzyloxycarbonylglycine	Nta01g32550	-0.880175	0.000158572
7-Hydroxy-3,5,8-trimethoxy-3',4'-methylenedioxyflavone	Nta01g32550	-0.881574	0.000149891
N6-Methyladenosine	Nta01g32550	0.825388	0.000945936
Aspartylphenylalanine	Nta01g32550	0.79472	0.00201056
Pro Ile	Nta01g32550	-0.880066	0.000159261
4-Isopropyl-2-methylphenol	Nta01g32550	-0.957502	1.01646e-06
ciguatoxin IJKLM cyclic acetal	Nta01g32550	-0.935726	7.75047e-06
Arg Leu Ile	Nta01g32550	0.98041	2.19863e-08
Maryal	Nta01g32550	-0.844245	0.000552405
7-O-[alpha-L-rhamnosyl-(1->2)-beta-D-glucosyl]isovitexin	Nta01g32550	-0.900386	6.52146e-05
Ser Phe	Nta01g32550	0.931976	1.02253e-05
Scutebarbatine J	Nta01g32550	-0.834865	0.000727801
H-Ile-Tyr-OH	Nta01g32550	0.893926	8.82925e-05
Cucurbitacin I	Nta01g32550	-0.874535	0.000197614
7alpha-Hydroxyeurycomalactone	Nta01g32550	0.906886	4.70653e-05
Epimedoicarisoside A	Nta01g32550	-0.813421	0.00128977
Perphenazine	Nta01g32550	-0.869442	0.000238976
Chaetoglobosin N	Nta01g32550	-0.833434	0.000757961
Armillane	Nta01g32550	-0.873015	0.000209321
(3R,5R)-3-(((3R,5R)-3,5-dihydroxy decanoyl)oxy)-5-hydroxydecanoic acid	Nta01g32550	-0.950389	2.17722e-06
H-Phe-Val-OH	Nta01g32550	0.872335	0.000214729
Sulfocholic acid	Nta01g32550	0.968893	2.17731e-07
Tetranor-12R-HETE	Nta01g32550	0.77061	0.00335313
9-(alpha-D-glucosyl)dihydrozeatin	Nta01g32550	0.939171	5.91898e-06
5beta-Dihydrocortisol	Nta01g32550	0.772145	0.00325147
3-Mercaptolactate	Nta01g32550	-0.912468	3.48865e-05
13-Hydroxycapsidiol	Nta01g32550	-0.851992	0.000433938
Ile Ile Ser	Nta01g32550	0.853555	0.000412642
Clotrimazole	Nta01g32550	-0.820449	0.00107796
Globulusin B	Nta01g32550	-0.772352	0.003238
11-Meo-fes	Nta01g32550	0.829752	0.000840009
6-Oxabicyclo[3.1.0]hexane-2-undecanoic acid methyl ester	Nta01g32550	0.764652	0.00377056
Ptaquiloside	Nta01g32550	-0.801654	0.00171448
Kanzonol S	Nta01g32550	-0.926507	1.49118e-05
CADALENE	Nta01g32550	-0.831829	0.000792918
Cyclo(phenylalanyl-prolyl)	Nta01g32550	-0.87877	0.000167674
Trp Phe Glu	Nta01g32550	-0.88514	0.000129444
Val Val Ile	Nta01g32550	0.880085	0.000159143
Trimethobenzamide	Nta01g32550	0.92352	1.81055e-05
Leu Ile Thr	Nta01g32550	0.904196	5.40174e-05
Cyanofenphos	Nta01g32550	0.823835	0.000986025
Kadsuphilol G	Nta01g32550	-0.881375	0.000151104
S-Methyl-methionine	Nta01g32550	0.733125	0.00667103
Glycyl-L-leucine	Nta01g32550	0.642797	0.0241661
Leu-Leu-Asp	Nta01g32550	0.791177	0.00217616
2-thio-PAF	Nta01g32550	-0.881889	0.000147992
N-Benzylformamide	Nta01g32550	-0.866182	0.000268789
Alisol C 23-acetate	Nta01g32550	-0.789824	0.00224208
Virenamide A	Nta01g32550	-0.874397	0.000198657
Dihydrofusarubin	Nta01g32550	0.717923	0.00855518
Methyl-4-O-methylgallate	Nta01g32550	-0.907106	4.65299e-05
Procaine	Nta01g32550	0.915415	2.9545e-05
Quercimeritrin	Nta01g32550	0.813372	0.00129133
4-Carboxy-4-hydroxy-2-oxoadipate	Nta01g32550	-0.862048	0.000310693
21-Fluoro-16-ethyl-19-norprogesterone	Nta01g32550	0.945865	3.34239e-06
3-Ethyltoluene	Nta01g32550	-0.895829	8.09177e-05
Cichorioside N	Nta01g32550	-0.855067	0.000392821
H-PHE-PHE-OH	Nta01g32550	0.895093	8.37109e-05
Monensin B	Nta01g32550	-0.825557	0.00094165
Pyroglutamyl-Isoleucine	Nta01g32550	0.697839	0.0116213
Morin	Nta01g32550	0.824561	0.000967127
GroPIns	Nta01g32550	0.787272	0.00237056
Yunngnin A	Nta01g32550	-0.91237	3.5076e-05
Medicagenic acid 3-O-triglucoside	Nta01g32550	-0.842898	0.000575329
5-epi-Valiolol 7-phosphate	Nta01g32550	-0.908205	4.39253e-05
Lactose 6-phosphate	Nta01g32550	-0.864363	0.000286652
Scutianine J	Nta01g32550	-0.780443	0.00274214
4Z,7Z,10Z,13Z-hexadecatetraenoic acid	Nta01g32550	0.69003	0.0130102
Pseudostellarin B	Nta01g32550	-0.748532	0.00509827
cotinine-glucuronide	Nta01g32550	-0.920793	2.14715e-05
H-Val-Met-OH	Nta01g32550	0.707894	0.00999902
L-Alanyl-L-leucine	Nta01g32550	0.783653	0.0025623
Arg Asp Met	Nta01g32550	-0.818716	0.0011275
Gossypol	Nta01g32550	-0.822383	0.00102468
DG(i-16:0/0:0/PGD2)	Nta01g32550	0.802323	0.00168779
Theogallin	Nta01g32550	-0.813343	0.00129229
Debromohymenialdisine	Nta01g32550	0.61492	0.0333405
2-keto palmitic acid	Nta01g32550	0.746286	0.00530799
Striatisporin A	Nta01g32550	0.736264	0.00632445
Bungeiside B	Nta01g32550	-0.830029	0.000833592
Asp-Leu-Val-Ser	Nta01g32550	0.840085	0.000625595
alpha-Ionol O-[arabinosyl-(1->6)-glucoside]	Nta01g32550	0.831691	0.000795995
Voriconazole	Nta01g32550	-0.948351	2.65329e-06
Cimiracemoside D	Nta01g32550	0.810143	0.00139886
Garcinolic Acid	Nta01g32550	-0.949491	2.37785e-06
Cryptotanshinone	Nta01g32550	0.69023	0.012973
Semilepidinoside B	Nta01g32550	-0.919014	2.39198e-05
3,3-Bis(4-hydroxyphenyl)pentane	Nta01g32550	0.478858	0.115258
Dianthoside	Nta01g32550	-0.870252	0.000231984
LOLIOLIDE	Nta01g32550	-0.877224	0.000178165
Melissoidesin D	Nta01g32550	-0.93708	6.98393e-06
8-MeSO-octyl-CN	Nta01g32550	0.783876	0.00255018
Cachineside I	Nta01g32550	-0.824148	0.000977829
Kinetensin 1-3	Nta01g32550	0.959054	8.46094e-07
Jerantinine H	Nta01g32550	0.74243	0.00568332
Cytisoside	Nta01g32550	-0.737394	0.00620306
7-Deazaadenosine	Nta01g32550	-0.754777	0.0045478
N6-Threonylcarbamoyladenosine	Nta01g32550	-0.938531	6.23011e-06
Nigellimine N-oxide	Nta01g32550	0.781647	0.00267361
Gamma-Glu-Leu	Nta01g32550	0.899353	6.85452e-05
Isomorellinol	Nta01g32550	0.949442	2.38925e-06
Glycylprolylhydroxyproline	Nta01g32550	0.823197	0.00100286
Scabiolide	Nta01g32550	0.77509	0.0030631
Isoscopoletin	Nta01g32550	-0.952156	1.82159e-06
Phe Trp Ser	Nta01g32550	-0.832123	0.000786435
N-(2-Carboxyphenyl)retinamide	Nta01g32550	0.907406	4.58075e-05
12-O-Benzoylisolineolon	Nta01g32550	-0.859053	0.000344103
Trifochalcanoloside I	Nta01g32550	0.786756	0.0023972
Wahlenoside A	Nta01g32550	-0.586311	0.0451101
(+)-Oxyglutinosone	Nta01g32550	-0.828739	0.00086373
Erythro-carolignan E	Nta01g32550	-0.918802	2.42251e-05
4-Methylumbelliferyl beta-D-glucuronide	Nta01g32550	-0.911451	3.68954e-05
carbidopa	Nta01g32550	-0.714559	0.00902078
H-Thr-Phe-OH	Nta01g32550	0.68136	0.0146918
FA 18:2+1O	Nta01g32550	0.893692	8.92339e-05
rel-Cyclo-(Pro-Pro-Ala-Gly-Leu-Ala-Thr-Phe)	Nta01g32550	-0.899074	6.94666e-05
Podorhizol beta-D-glucoside	Nta01g32550	-0.755928	0.00445142
Thr Leu	Nta01g32550	0.719082	0.00839896
Vicibactin-7101	Nta01g32550	-0.91302	3.38318e-05
1-Methylguanosine	Nta01g32550	0.950675	2.11621e-06
Neuromedin B (1-3)	Nta01g32550	0.676952	0.0156057
Picrocrocin	Nta01g32550	-0.809448	0.00142288
(6R,9S)-3-Oxo-alpha-ionol beta-D-glucoside	Nta01g32550	-0.86051	0.000327512
anthraniloyl-O-glucose	Nta01g32550	-0.85852	0.000350328
Pyrogallol-2-O-glucuronide	Nta01g32550	0.807989	0.00147431
Tricetin	Nta01g32550	0.846586	0.000514246
Rhyncoside A	Nta01g32550	-0.882869	0.000142195
2-(3,4,5-Trimethoxyphenyl)-5,6,7,8-tetramethoxy-4H-1-benzopyran-4-one	Nta01g32550	0.802313	0.00168816
Dihydrotricetin 7,3'-dimethyl ether	Nta01g32550	-0.509157	0.0908978
Linaride	Nta01g32550	-0.832036	0.000788357
Corymbiferan lactone A	Nta01g32550	-0.816719	0.00118672
2-Thiophenecarboxaldehyde	Nta01g32550	-0.858502	0.000350537
Cephaeline	Nta01g32550	0.671976	0.0166869
Thymoquinol 2-O-beta-glucopyranoside	Nta01g32550	-0.745377	0.00539481
4-Isopropyl-2,4,6-cycloheptatrien-1-one	Nta01g32550	-0.937072	6.98849e-06
Kunzeaphlogin A	Nta01g32550	-0.93813	6.43173e-06
3-[(3-Methylbutyl)nitrosoamino]-2-butanone	Nta01g32550	0.89665	7.78905e-05
Norsanguinine	Nta01g32550	-0.848247	0.000488434
N-Acetyl-leucyl-leucine	Nta01g32550	0.889783	0.000106171
2-Thiouridine	Nta01g32550	-0.534728	0.0732562
Palythoalone A	Nta01g32550	-0.897878	7.35277e-05
Padmatin 5-glucoside	Nta01g32550	0.842294	0.000585847
12-Oxocurvularin	Nta01g32550	-0.958166	9.4051e-07
Vardenafil	Nta01g32550	-0.864079	0.000289518
1-O-Cinnamoyl-beta-D-gentiobiose	Nta01g32550	-0.966227	3.26971e-07
Sodwanone L	Nta01g32550	0.881049	0.000153103
Dibenzo[h,rst]pentaphene	Nta01g32550	-0.760357	0.00409502
Pro Glu Ile	Nta01g32550	0.889852	0.000105849
Lys Leu	Nta01g32550	0.636205	0.0261459
Matairesinol	Nta01g32550	-0.893315	9.0771e-05
Tormentic acid	Nta01g32550	-0.806145	0.00154139
Estriol 3-sulfate	Nta01g32550	-0.796476	0.00193211
Lys Leu Asp	Nta01g32550	0.639503	0.0251411
Ajubractin D	Nta01g32550	0.854246	0.000403487
fagopyritol A2	Nta01g32550	-0.845219	0.000536273
Sphenalactone B	Nta01g32550	-0.864375	0.000286526
Eriojaposide A	Nta01g32550	-0.858524	0.000350275
2-Carboxybenzaldehyde	Nta01g32550	-0.859775	0.000335803
H-PHE-ASP-OH	Nta01g32550	0.95701	1.07575e-06
Dolichol phosphate	Nta01g32550	0.687251	0.0135328
Sesbanimide A	Nta01g32550	-0.920438	2.19435e-05
Thielavin E	Nta01g32550	-0.823263	0.00100111
Guanosine-3',5'-cyclic monophosphate	Nta01g32550	0.827256	0.000899413
2-Amino-4-(2-aminophenyl)-4-oxobutanoic acid	Nta01g32550	-0.789162	0.00227488
2-Methyl-trans-aconitate	Nta01g32550	-0.713797	0.00912883
Hexadecanedioic acid	Nta01g32550	0.618318	0.0321065
Bactobolin	Nta01g32550	-0.775432	0.0030418
Secobarbital	Nta01g32550	-0.388481	0.212041
Tinosposinenside B	Nta01g32550	0.909405	4.12128e-05
Asparaginyl-Valine	Nta01g32550	0.723442	0.0078303
Pro Phe Asn	Nta01g32550	0.778912	0.00283115
CLONIXIN	Nta01g32550	-0.953451	1.59158e-06
Dodecafluoropentane	Nta01g32550	0.881082	0.000152901
5-(4-Acetoxybut-1-ynyl)-2,2'-bithiophene	Nta01g32550	-0.895253	8.30964e-05
PA(18:1(11Z)/19:0)	Nta01g32550	-0.809047	0.00143689
Piclamilast	Nta01g32550	-0.789714	0.00224752
Leu Ile Asn	Nta01g32550	0.941506	4.88626e-06
3-(prop-2-enoate)-o-benzoquinone	Nta01g32550	-0.875122	0.000193236
(+)-Jasplakinolide Z1	Nta01g32550	-0.902477	5.8866e-05
Pentandroside C	Nta01g32550	0.715319	0.00891401
PHENOLPHTHALEIN	Nta01g32550	-0.820513	0.00107617
Lancerin	Nta01g32550	-0.808322	0.00146245
N-Phenylacetylaspartic acid	Nta01g32550	-0.796745	0.00192031
PA(18:2(9Z,11E)+=O(13)/a-25:0)	Nta01g32550	-0.822294	0.00102707
Palau'imide	Nta01g32550	0.930989	1.09702e-05
Dendronesterol B	Nta01g32550	-0.899332	6.86129e-05
Androstan-3alpha,17beta-diol	Nta01g32550	-0.871177	0.000224192
L-Aspartic acid	Nta01g32550	0.867228	0.000258925
2-Hydroxy-3-(beta-D-xylopyranosyloxy)benzoic acid	Nta01g32550	-0.715479	0.00889169
Fraxetin	Nta01g32550	-0.747426	0.00520075
Deacetylasperulosidic Acid	Nta01g32550	-0.812348	0.00132472
Methyl 2-(4-isopropyl-4-methyl-5-oxo-2-imidazolin-2-yl)-p-toluate	Nta01g32550	-0.895279	8.29986e-05
FMN	Nta01g32550	0.91495	3.03419e-05
Desfesoterodine	Nta01g32550	0.967045	2.89631e-07
Devazepide	Nta01g32550	-0.865884	0.000271657
Cannabisin C	Nta01g32550	0.877904	0.000173487
(+)-Rishirilide B	Nta01g32550	0.712598	0.0093008
Fungichromin	Nta01g32550	-0.920232	2.22211e-05
Ile Thr Phe	Nta01g32550	0.89402	8.79156e-05
4-Guanidinobutanal	Nta01g32550	0.762764	0.00391069
PA(20:4(8Z,11Z,14Z,17Z)/20:3(6,8,11)-OH(5))	Nta01g32550	0.687435	0.0134976
Speradine G	Nta01g32550	-0.71734	0.00863447
8-Hydroxyluteolin 8-gentiobioside	Nta01g32550	0.670293	0.0170647
4-(Dimethylamino)butyl carbamimidothioate	Nta01g32550	0.772192	0.00324841
Topsentisterol B1	Nta01g32550	-0.790481	0.00220988
Nocardamine	Nta01g32550	-0.807907	0.00147725
Maculosin	Nta01g32550	-0.842481	0.000582574
Fluocinonide	Nta01g32550	-0.785197	0.0024791
Gln Leu Leu	Nta01g32550	0.966694	3.05208e-07
Sachaloside VII	Nta01g32550	-0.721201	0.00811894
Chlorphenoxamine	Nta01g32550	-0.803034	0.00165979
Tyr Gln Phe	Nta01g32550	-0.794151	0.00203648
Euphodendrophane E	Nta01g32550	-0.946084	3.2764e-06
Strictoloside	Nta01g32550	-0.84469	0.000544988
Rubescensin M	Nta01g32550	-0.735282	0.00643145
9-(2,3-dihydroxypropoxy)-9-oxononanoic acid	Nta01g32550	-0.868544	0.000246919
4-(beta-D-glucosyloxy)-3-hydroxy-benzoic acid	Nta01g32550	-0.863157	0.000298982
Virescenoside R	Nta01g32550	0.653925	0.0210742
Leu-Val-Gly	Nta01g32550	0.783346	0.00257911
12S-HHTrE	Nta01g32550	0.670333	0.0170556
3,3'-Dihydroxyisorenieratene	Nta01g32550	0.849954	0.000462981
Tetradecanoylcarnitine	Nta01g32550	0.888754	0.00011102
4-Hydroxyestrone sulfate	Nta03g35020	-0.9055	5.05543e-05
Domperidone	Nta03g35020	-0.892092	9.58875e-05
Tinosinenside	Nta03g35020	-0.888927	0.000110192
Chloriolide	Nta03g35020	0.859575	0.000338087
GLY-GLY-ILE	Nta03g35020	0.936365	7.38109e-06
Pterocellin F	Nta03g35020	-0.854114	0.000405215
H-ILE-TRP-OH	Nta03g35020	0.89539	8.25764e-05
Rutaevin	Nta03g35020	-0.879632	0.000162039
Ser Ser Ile	Nta03g35020	0.946157	3.25487e-06
Trp Gly	Nta03g35020	0.810036	0.00140255
Citrifolinin B epimer b	Nta03g35020	-0.80493	0.00158682
beta-Alanyl-L-arginine	Nta03g35020	0.924656	1.68333e-05
Ketobemidone	Nta03g35020	0.643246	0.0240354
Jatamanvaltrate H	Nta03g35020	-0.833922	0.000747566
Tetradecyl iodide	Nta03g35020	-0.909248	4.15619e-05
Acetyl tributyl citrate	Nta03g35020	0.791475	0.00216183
Phenylalanylserine	Nta03g35020	0.816756	0.0011856
DIMBOA-Glc	Nta03g35020	-0.866489	0.00026587
2',3'-Dideoxyadenosine	Nta03g35020	-0.880859	0.000154281
H-TRP-ALA-OH	Nta03g35020	0.823718	0.000989101
Anthothecanolide	Nta03g35020	-0.89541	8.24993e-05
Pulcherrin C	Nta03g35020	-0.880036	0.000159452
Alnustone	Nta03g35020	-0.933043	9.46526e-06
Phe Gly Ile	Nta03g35020	0.943539	4.10861e-06
Tinocordiside	Nta03g35020	-0.901043	6.31659e-05
lysine tyrosylquinone	Nta03g35020	0.787546	0.0023565
2-OH-C16 :0 Ceramide	Nta03g35020	0.944027	3.93709e-06
Coumanolignan	Nta03g35020	-0.809168	0.00143263
Pyramidatin D	Nta03g35020	0.840911	0.000610497
5'-N-Methylcarboxamidoadenosine	Nta03g35020	0.963166	5.01952e-07
Lysylphenylalanine	Nta03g35020	0.776261	0.00299057
Lys Ile Ile	Nta03g35020	0.922699	1.90716e-05
5,8-Dimethoxymaculine	Nta03g35020	-0.819643	0.00110077
Valyllysine	Nta03g35020	0.954538	1.41677e-06
Phe-Asn	Nta03g35020	0.937154	6.94363e-06
Ala Leu Leu	Nta03g35020	0.889119	0.000109282
(+)-argemonine	Nta03g35020	-0.805494	0.00156561
Plagiospirolide E	Nta03g35020	-0.771307	0.00330665
Ala Gly Leu	Nta03g35020	0.735851	0.00636926
Nordihydrocapsaicin	Nta03g35020	0.908497	4.32537e-05
Dimethoxane	Nta03g35020	-0.947356	2.9142e-06
His Glu Asn	Nta03g35020	-0.824093	0.000979284
Ser Ile Phe	Nta03g35020	0.911187	3.74323e-05
Cuspidiol	Nta03g35020	-0.856444	0.000375414
Cheiradone	Nta03g35020	-0.872287	0.000215117
(2R,3R)-3-Methylglutamyl-5-semialdehyde-N6-lysine	Nta03g35020	0.947528	2.86773e-06
tryptoquialanol	Nta03g35020	-0.783773	0.00255579
beta-Aflatrem	Nta03g35020	0.913801	3.23832e-05
Asp Val Leu	Nta03g35020	0.862723	0.000303527
Leu-Val-Ser	Nta03g35020	0.917557	2.60842e-05
Arg Leu	Nta03g35020	0.761082	0.00403887
LysoPE(20:4)	Nta03g35020	0.841778	0.00059495
Thr Leu Thr	Nta03g35020	0.88947	0.000107627
H-LEU-LEU-GLY-OH	Nta03g35020	0.898384	7.17887e-05
Thr-Trp	Nta03g35020	0.940093	5.49247e-06
Lactulose	Nta03g35020	-0.832651	0.000774862
Gabaculine	Nta03g35020	-0.7999	0.00178596
Histidylleucine	Nta03g35020	0.951691	1.91029e-06
11beta,13-dihydrolactucin 15-oxalate	Nta03g35020	0.895098	8.36905e-05
Gly Phe Val	Nta03g35020	0.808837	0.00144425
(R)-(Homo)3-citrate	Nta03g35020	-0.872677	0.000211993
L-Alanyl-L-proline	Nta03g35020	0.86647	0.00026605
Leu-Ala-Ser	Nta03g35020	0.948449	2.62885e-06
Ile Ile Asp	Nta03g35020	0.799111	0.00181889
Trp-Ala-Gly	Nta03g35020	0.766914	0.00360766
Asn Val Leu	Nta03g35020	0.868262	0.000249453
Pandangolide 1	Nta03g35020	0.96437	4.25969e-07
(-)-7-Hydroxylariciresinol 9'-p-coumarate	Nta03g35020	-0.816485	0.00119383
(+)-8-Acetoxycarvone	Nta03g35020	0.81896	0.00112042
3-Oxo-11,13(18)-oleandien-28-oic acid	Nta03g35020	-0.777577	0.00291061
gamma-Hydroxy-3-pyridinebutanoate	Nta03g35020	-0.841017	0.000608581
H-MET-MET-OH	Nta03g35020	-0.805643	0.00156003
Phe Gly	Nta03g35020	0.762182	0.00395465
3-Hydroxybibenzyl	Nta03g35020	-0.814354	0.00125995
Papuanone	Nta03g35020	0.828128	0.000878303
HQNO	Nta03g35020	0.553593	0.061857
4'-Hydroxy-3,5,8,3'-tetramethoxy-7-prenyloxyflavone	Nta03g35020	-0.812694	0.00131337
PMEG	Nta03g35020	-0.777565	0.00291133
Cysteinylglycine	Nta03g35020	-0.76795	0.0035349
Arteannuin B	Nta03g35020	-0.872877	0.000210412
Brachystemidine B	Nta03g35020	-0.895631	8.16621e-05
(S)-Furanopetasitin	Nta03g35020	-0.897414	7.51546e-05
Tetrahydrocurcumin	Nta03g35020	-0.86283	0.000302398
Dictamnoside L	Nta03g35020	-0.863819	0.000292161
Asp Thr Leu	Nta03g35020	0.836902	0.000686501
Crispine A	Nta03g35020	0.534363	0.0734904
Chlorochrymorin	Nta03g35020	-0.89785	7.3627e-05
2-Oxoglutarate	Nta03g35020	-0.893619	8.95317e-05
Aminobutyl benzamide	Nta03g35020	0.900233	6.56998e-05
Glucovanillin	Nta03g35020	-0.821377	0.00105214
Leu Leu Gln	Nta03g35020	0.80422	0.00161383
Ghalakinoside	Nta03g35020	-0.848171	0.000489595
Alanylhydroxyproline	Nta03g35020	0.82478	0.000961486
Phe-arg	Nta03g35020	0.76149	0.00400747
Catalpol	Nta03g35020	-0.829234	0.000852079
Val Asp Leu	Nta03g35020	0.847246	0.000503865
Salbostatin	Nta03g35020	-0.84651	0.000515454
Cholestenone	Nta03g35020	-0.844912	0.000541314
3-Hydroxyhippuric acid	Nta03g35020	-0.806133	0.00154181
Dendromoniliside A	Nta03g35020	-0.884693	0.000131884
Evocalcet	Nta03g35020	0.845671	0.000528907
Lophanthoidin F	Nta03g35020	0.963391	4.87001e-07
Dictyoquinazol A	Nta03g35020	0.908052	4.42804e-05
Leu-Thr-Ser	Nta03g35020	0.925118	1.63365e-05
Thr Leu Ile	Nta03g35020	0.871514	0.000221404
N-Acetyl-glutamine	Nta03g35020	0.699933	0.0112684
Ser Ile Ala	Nta03g35020	0.796301	0.00193982
H-Leu-Asn-OH	Nta03g35020	0.786689	0.00240067
Acanthoglabrolide	Nta03g35020	-0.858781	0.000347269
Rehmannioside C	Nta03g35020	-0.836243	0.000699656
Anthosterone B	Nta03g35020	-0.838142	0.00066224
Ala-Leu-Leu-Asp	Nta03g35020	0.922472	1.93461e-05
Ancistrogriffithine A	Nta03g35020	-0.917414	2.63053e-05
Ingenol Mebutate	Nta03g35020	0.968868	2.18586e-07
PYRAOXYSTROBIN	Nta03g35020	-0.808206	0.00146659
Tryptophyl-Isoleucine	Nta03g35020	0.875856	0.000187859
Pro Ile Ala	Nta03g35020	0.859961	0.000333689
Ile Glu Leu	Nta03g35020	0.8693	0.000240212
Triptofordin D 1	Nta03g35020	-0.872974	0.000209642
Ala Leu Glu	Nta03g35020	0.830238	0.000828796
p-Menth-1-ene-3,4-diol 4-O-beta-glucopyranoside	Nta03g35020	0.976205	5.77313e-08
Obliquine	Nta03g35020	0.916377	2.79498e-05
Tiruchanduramine	Nta03g35020	-0.787207	0.00237394
Genipin	Nta03g35020	-0.788837	0.00229113
6beta-Hydroxyhuperzine A	Nta03g35020	-0.807687	0.00148516
Atractyloside A	Nta03g35020	-0.736362	0.00631387
Ser Leu Ile	Nta03g35020	0.733231	0.00665909
Formylfusarochromanone	Nta03g35020	-0.846045	0.000522873
Astellolide B	Nta03g35020	-0.872776	0.000211212
zinolol	Nta03g35020	-0.822504	0.00102142
Tyr Leu	Nta03g35020	0.818801	0.00112503
Verbenalin	Nta03g35020	-0.874517	0.000197747
Ixoside	Nta03g35020	-0.912267	3.52767e-05
Phe-Ala-Gly	Nta03g35020	0.851963	0.000434338
DL-Leucyl-DL-phenylalanine	Nta03g35020	0.86395	0.000290831
Ile Ile	Nta03g35020	0.792787	0.00209967
Glidobactin D	Nta03g35020	-0.84377	0.000560415
Val Ile Leu	Nta03g35020	0.925417	1.60204e-05
Met Leu	Nta03g35020	0.915351	2.96541e-05
Phe-Ala-Asp	Nta03g35020	0.722457	0.00795624
Terragine E	Nta03g35020	0.848955	0.000477755
Picfeltarraenin IB	Nta03g35020	0.686022	0.0137688
Succinylaminoimidazole carboxamide riboside	Nta03g35020	-0.883638	0.000137774
Isothalicrine	Nta03g35020	0.94386	3.99531e-06
Ascochalasin	Nta03g35020	-0.792637	0.00210668
Thr Glu	Nta03g35020	0.904382	5.35107e-05
Asp-Trp	Nta03g35020	0.641317	0.0246007
Garajonone	Nta03g35020	-0.816143	0.00120425
Eriotriochin	Nta03g35020	-0.769359	0.0034377
Ala-Leu-Val-Ser	Nta03g35020	0.89482	8.47672e-05
Nitropyrrolin D	Nta03g35020	0.582394	0.0469229
D-Phe-Pro-Arg-CH2Cl	Nta03g35020	0.858314	0.000352759
Circinamide	Nta03g35020	0.869249	0.00024066
Spinanine A	Nta03g35020	-0.781298	0.00269334
1,3-Dihydroxy-1-(4-hydroxy-3,5-dimethoxyphenyl)propan-2-one	Nta03g35020	-0.820171	0.00108578
H-Val-Tyr-OH	Nta03g35020	0.721931	0.00802399
1-Methyl-2-hydroadenosine	Nta03g35020	0.830073	0.000832591
3-(4-hydroxy-3-methoxyphenyl)propanoate	Nta03g35020	-0.905044	5.17444e-05
Glu-Ile-Val	Nta03g35020	0.937782	6.61101e-06
Asn-Tyr	Nta03g35020	0.874885	0.000194993
TXB1	Nta03g35020	-0.830802	0.000815949
Consabatine	Nta03g35020	0.633861	0.0268774
3-Hydroxy-prazepam	Nta03g35020	-0.865046	0.000279837
Ile Phe Asp	Nta03g35020	0.876672	0.000182027
Lys Val Leu	Nta03g35020	0.91859	2.45344e-05
Repandin D	Nta03g35020	-0.793304	0.00207555
3-Methyldioxyindole	Nta03g35020	-0.841383	0.000601997
6-O-Veratroylcatalpol	Nta03g35020	0.812635	0.00131529
(+)-7alpha,8alpha-Epoxyblumenol B	Nta03g35020	0.838577	0.000653909
Euperfolitin	Nta03g35020	-0.808289	0.00146363
Phenylalanyltryptophan	Nta03g35020	0.909689	4.05922e-05
Syringopicroside	Nta03g35020	-0.818072	0.00114635
Lysylserine	Nta03g35020	0.895162	8.3445e-05
Leu-Thr-Ala	Nta03g35020	0.888344	0.000113
Oxostephamiersine	Nta03g35020	-0.735815	0.00637321
Esculin	Nta03g35020	-0.824536	0.000967781
Etravirine	Nta03g35020	0.805567	0.00156288
Madecassoside	Nta03g35020	-0.850214	0.000459182
Aucubin	Nta03g35020	-0.868089	0.000251019
Cenocladamide	Nta03g35020	-0.844443	0.000549088
L-Leucyl-L-alanine	Nta03g35020	0.69919	0.0113928
Eletriptan	Nta03g35020	-0.856557	0.000374019
Stachyline D	Nta03g35020	0.760549	0.00408008
Corchoionoside C	Nta03g35020	-0.815924	0.00121096
Val Arg	Nta03g35020	0.853196	0.000417456
Glu-Asp-Ile	Nta03g35020	0.901788	6.09009e-05
Salvadione C	Nta03g35020	0.75485	0.00454159
Diprotin A	Nta03g35020	0.876399	0.000183963
Javanicoside B	Nta03g35020	-0.857973	0.000356809
Gardenoside	Nta03g35020	-0.880031	0.000159483
Isostephodeline	Nta03g35020	-0.812774	0.00131077
Ile Pro Val	Nta03g35020	0.755547	0.00448319
Kahakamide A	Nta03g35020	-0.795917	0.00195683
Toddaliopsin A	Nta03g35020	-0.838717	0.000651237
Aminophenazone	Nta03g35020	0.707092	0.0101218
His Phe	Nta03g35020	0.913073	3.37319e-05
Cardiospermin	Nta03g35020	-0.842565	0.000581111
Allopurinol riboside	Nta03g35020	-0.712714	0.00928416
H-Ser-Leu-OH	Nta03g35020	0.740579	0.00587041
Stilbostemin H 3'-beta-D-glucopyranoside	Nta03g35020	-0.897399	7.5206e-05
(+)-Galwesine	Nta03g35020	0.749378	0.00502089
1beta-(3-Hydroxy-4,5-dimethoxyphenyl)-O-glucopyranoside	Nta03g35020	-0.876959	0.000180012
Bistratamide B	Nta03g35020	-0.848657	0.000482229
Cedryl acetate	Nta03g35020	0.759627	0.00415228
Litsenolide C1	Nta03g35020	0.857575	0.000361579
Myrothenone A	Nta03g35020	-0.824606	0.000965967
Trichodepsipeptide A	Nta03g35020	-0.850658	0.000452775
Melampodinin B	Nta03g35020	0.827719	0.000888139
Ser Ile Ser	Nta03g35020	0.906298	4.85209e-05
Barlerin	Nta03g35020	-0.824532	0.000967869
Glu Glu Ile	Nta03g35020	0.927621	1.38414e-05
(-)-Taylorione	Nta03g35020	-0.82914	0.000854266
S-Adenosyl-L-methionine	Nta03g35020	0.882287	0.000145615
Chaetoquadrin E	Nta03g35020	0.937072	6.98812e-06
Methyl gallate 3-O-beta-D-glucopyranoside	Nta03g35020	-0.860611	0.000326395
7-Oxostaurosporine	Nta03g35020	-0.875983	0.000186945
Isoleucine	Nta03g35020	0.730346	0.00698957
Phenylalanylalanine	Nta03g35020	0.937488	6.76506e-06
Arg Val Leu	Nta03g35020	0.953597	1.56704e-06
alcaligin	Nta03g35020	0.825426	0.000944974
Methyl syringate	Nta03g35020	0.899005	6.96954e-05
Tuliposide A	Nta03g35020	-0.79016	0.00222556
Latrunculin B	Nta03g35020	-0.826816	0.000910195
13(S)-HODE	Nta03g35020	0.832393	0.000780506
Leu-Asp-Ser	Nta03g35020	0.792053	0.00213426
Isochondrodendrine	Nta03g35020	0.930295	1.15199e-05
4-Methylantirrhinoside	Nta03g35020	-0.87062	0.000228853
Guineamide D	Nta03g35020	-0.857956	0.000357007
Anagliptin	Nta03g35020	0.692063	0.0126373
H-PHE-LEU-OH	Nta03g35020	0.755348	0.00449981
Stellatoside B	Nta03g35020	-0.8223	0.00102691
Leu Ala Lys	Nta03g35020	0.931457	1.06116e-05
Pipacycline	Nta03g35020	-0.700756	0.011132
ent-15-Kaurene-17,19-dioic acid	Nta03g35020	0.923586	1.80298e-05
Lappaol D	Nta03g35020	-0.790117	0.0022277
Rossicasin A	Nta03g35020	-0.686924	0.0135953
Pro Arg Leu	Nta03g35020	0.939998	5.53523e-06
cis-(Homo)3-aconitate	Nta03g35020	-0.826199	0.000925518
Chabrolol B	Nta03g35020	0.866147	0.000269129
PA(22:5(7Z,10Z,13Z,16Z,19Z)/15:0)	Nta03g35020	0.73473	0.00649215
(+)-Quebrachidine	Nta03g35020	0.747775	0.00516825
Irisoquin	Nta03g35020	0.872136	0.000216329
Dehydrooreadone	Nta03g35020	-0.823696	0.000989681
Valtrate hydrine B3	Nta03g35020	-0.772016	0.00325998
Paulownioside	Nta03g35020	-0.928727	1.28407e-05
6-O-(4-Hydroxybenzoyl)-ajugol	Nta03g35020	0.95259	1.74164e-06
Pharboside G	Nta03g35020	0.780214	0.00275532
Clindamycin	Nta03g35020	0.834298	0.000739633
5'-Methylthioadenosine	Nta03g35020	0.744435	0.00548575
Indole-3-acetaldoxime	Nta03g35020	-0.913683	3.25986e-05
(R)-2-Hydroxy-7,8-dimethoxy-2H-1,4-benzoxazin-3(4H)-one 2-glucoside	Nta03g35020	-0.92713	1.43051e-05
(R)-8-Methylsulfinyloctyl isothiocyanate	Nta03g35020	-0.819826	0.00109557
Spongianolide E	Nta03g35020	-0.855571	0.000386376
Glu-Ile-Ser	Nta03g35020	0.807666	0.0014859
Irisoid E	Nta03g35020	0.89659	7.81096e-05
Lysylglutamic acid	Nta03g35020	0.786481	0.00241153
Benzoylagmatine	Nta03g35020	-0.927943	1.35438e-05
Leuhistin	Nta03g35020	0.834703	0.000731182
1-Benzylpiperazine	Nta03g35020	-0.824436	0.000970346
L-Xylulose	Nta03g35020	-0.844542	0.000547453
DG(18:4(6Z,9Z,12Z,15Z)/15:0/0:0)	Nta03g35020	0.901972	6.03535e-05
Dahuribirin F	Nta03g35020	-0.827801	0.00088617
(-)-Chrysogine	Nta03g35020	-0.775981	0.0030078
Nanjiol B	Nta03g35020	-0.847331	0.000502546
beta-fenchocamphorone	Nta03g35020	-0.883752	0.000137129
Garenoxacin	Nta03g35020	-0.838789	0.000649862
Curcumol	Nta03g35020	-0.826496	0.000918111
Hyperoside	Nta03g35020	0.765115	0.00373675
pre-putrebactin	Nta03g35020	0.913668	3.26262e-05
7-Methoxy-1,2,3,4-tetrahydroacridin-9-amine	Nta03g35020	0.866359	0.000267103
Cryptophorine	Nta03g35020	-0.725313	0.00759543
Stachysoside A	Nta03g35020	-0.859541	0.000338475
DG(PGD2/0:0/i-18:0)	Nta03g35020	0.912909	3.4041e-05
H-MET-TRP-OH	Nta03g35020	0.893078	9.17457e-05
Mallotophenone	Nta03g35020	-0.885197	0.000129138
H-LEU-LEU-ALA-OH	Nta03g35020	0.810683	0.00138042
Ramiprilat	Nta03g35020	0.86011	0.000332006
1-Hydroxycarvedilol	Nta03g35020	0.627987	0.0287751
N-Benzyloxycarbonylglycine	Nta03g35020	-0.852909	0.000421335
7-Hydroxy-3,5,8-trimethoxy-3',4'-methylenedioxyflavone	Nta03g35020	-0.852872	0.000421838
N6-Methyladenosine	Nta03g35020	0.766451	0.00364055
Aspartylphenylalanine	Nta03g35020	0.734904	0.00647295
Pro Ile	Nta03g35020	-0.834385	0.000737822
4-Isopropyl-2-methylphenol	Nta03g35020	-0.925561	1.58706e-05
ciguatoxin IJKLM cyclic acetal	Nta03g35020	-0.890843	0.000101349
Arg Leu Ile	Nta03g35020	0.949948	2.274e-06
Maryal	Nta03g35020	-0.792945	0.00209228
7-O-[alpha-L-rhamnosyl-(1->2)-beta-D-glucosyl]isovitexin	Nta03g35020	-0.896654	7.78759e-05
Ser Phe	Nta03g35020	0.912467	3.48878e-05
Scutebarbatine J	Nta03g35020	-0.812032	0.00133516
H-Ile-Tyr-OH	Nta03g35020	0.823789	0.000987226
Cucurbitacin I	Nta03g35020	-0.872163	0.000216114
7alpha-Hydroxyeurycomalactone	Nta03g35020	0.862393	0.000307011
Epimedoicarisoside A	Nta03g35020	-0.76356	0.00385112
Perphenazine	Nta03g35020	-0.819046	0.00111791
Chaetoglobosin N	Nta03g35020	-0.801206	0.00173252
Armillane	Nta03g35020	-0.850065	0.000461358
(3R,5R)-3-(((3R,5R)-3,5-dihydroxy decanoyl)oxy)-5-hydroxydecanoic acid	Nta03g35020	-0.918602	2.45167e-05
H-Phe-Val-OH	Nta03g35020	0.822849	0.00101213
Sulfocholic acid	Nta03g35020	0.930737	1.11677e-05
Tetranor-12R-HETE	Nta03g35020	0.730454	0.00697705
9-(alpha-D-glucosyl)dihydrozeatin	Nta03g35020	0.905715	4.99993e-05
5beta-Dihydrocortisol	Nta03g35020	0.751791	0.00480506
3-Mercaptolactate	Nta03g35020	-0.906237	4.86737e-05
13-Hydroxycapsidiol	Nta03g35020	-0.841342	0.000602731
Ile Ile Ser	Nta03g35020	0.80336	0.00164704
Clotrimazole	Nta03g35020	-0.80089	0.00174536
Globulusin B	Nta03g35020	-0.741017	0.00582568
11-Meo-fes	Nta03g35020	0.802092	0.00169696
6-Oxabicyclo[3.1.0]hexane-2-undecanoic acid methyl ester	Nta03g35020	0.72828	0.00723368
Ptaquiloside	Nta03g35020	-0.787455	0.00236118
Kanzonol S	Nta03g35020	-0.88757	0.000116813
CADALENE	Nta03g35020	-0.806057	0.00154463
Cyclo(phenylalanyl-prolyl)	Nta03g35020	-0.85926	0.000341699
Trp Phe Glu	Nta03g35020	-0.83483	0.00072853
Val Val Ile	Nta03g35020	0.833582	0.000754809
Trimethobenzamide	Nta03g35020	0.877152	0.000178662
Leu Ile Thr	Nta03g35020	0.826739	0.000912098
Cyanofenphos	Nta03g35020	0.830381	0.000825527
Kadsuphilol G	Nta03g35020	-0.819732	0.00109824
S-Methyl-methionine	Nta03g35020	0.778348	0.00286454
Glycyl-L-leucine	Nta03g35020	0.581437	0.0473738
Leu-Leu-Asp	Nta03g35020	0.723851	0.00777848
2-thio-PAF	Nta03g35020	-0.855632	0.000385602
N-Benzylformamide	Nta03g35020	-0.810474	0.00138755
Alisol C 23-acetate	Nta03g35020	-0.773388	0.00317095
Virenamide A	Nta03g35020	-0.827102	0.000903177
Dihydrofusarubin	Nta03g35020	0.74897	0.00505805
Methyl-4-O-methylgallate	Nta03g35020	-0.879197	0.000164865
Procaine	Nta03g35020	0.928818	1.27608e-05
Quercimeritrin	Nta03g35020	0.810913	0.00137262
4-Carboxy-4-hydroxy-2-oxoadipate	Nta03g35020	-0.832098	0.000786983
21-Fluoro-16-ethyl-19-norprogesterone	Nta03g35020	0.884466	0.000133133
3-Ethyltoluene	Nta03g35020	-0.849348	0.000471893
Cichorioside N	Nta03g35020	-0.82374	0.00098852
H-PHE-PHE-OH	Nta03g35020	0.855704	0.000384697
Monensin B	Nta03g35020	-0.806136	0.00154172
Pyroglutamyl-Isoleucine	Nta03g35020	0.660722	0.0193338
Morin	Nta03g35020	0.82919	0.000853101
GroPIns	Nta03g35020	0.752548	0.00473886
Yunngnin A	Nta03g35020	-0.894385	8.64671e-05
Medicagenic acid 3-O-triglucoside	Nta03g35020	-0.814667	0.00125005
5-epi-Valiolol 7-phosphate	Nta03g35020	-0.874235	0.000199883
Lactose 6-phosphate	Nta03g35020	-0.819792	0.00109654
Scutianine J	Nta03g35020	-0.763901	0.00382585
4Z,7Z,10Z,13Z-hexadecatetraenoic acid	Nta03g35020	0.666414	0.0179595
Pseudostellarin B	Nta03g35020	-0.698495	0.01151
cotinine-glucuronide	Nta03g35020	-0.895333	8.27946e-05
H-Val-Met-OH	Nta03g35020	0.677484	0.0154931
L-Alanyl-L-leucine	Nta03g35020	0.724825	0.00765623
Arg Asp Met	Nta03g35020	-0.801461	0.00172222
Gossypol	Nta03g35020	-0.77579	0.00301963
DG(i-16:0/0:0/PGD2)	Nta03g35020	0.718494	0.00847787
Theogallin	Nta03g35020	-0.816195	0.00120265
Debromohymenialdisine	Nta03g35020	0.592743	0.0422415
2-keto palmitic acid	Nta03g35020	0.776415	0.00298115
Striatisporin A	Nta03g35020	0.719862	0.00829508
Bungeiside B	Nta03g35020	-0.796961	0.00191088
Asp-Leu-Val-Ser	Nta03g35020	0.835664	0.000711372
alpha-Ionol O-[arabinosyl-(1->6)-glucoside]	Nta03g35020	0.802138	0.00169514
Voriconazole	Nta03g35020	-0.900819	6.38588e-05
Cimiracemoside D	Nta03g35020	0.74801	0.00514646
Garcinolic Acid	Nta03g35020	-0.917074	2.68355e-05
Cryptotanshinone	Nta03g35020	0.638351	0.0254889
Semilepidinoside B	Nta03g35020	-0.878863	0.000167063
3,3-Bis(4-hydroxyphenyl)pentane	Nta03g35020	0.386815	0.214179
Dianthoside	Nta03g35020	-0.830964	0.000812268
LOLIOLIDE	Nta03g35020	-0.842511	0.000582055
Melissoidesin D	Nta03g35020	-0.889532	0.000107336
8-MeSO-octyl-CN	Nta03g35020	0.715746	0.00885435
Cachineside I	Nta03g35020	-0.787761	0.00234554
Kinetensin 1-3	Nta03g35020	0.948203	2.69091e-06
Jerantinine H	Nta03g35020	0.690187	0.0129811
Cytisoside	Nta03g35020	-0.720196	0.00825078
7-Deazaadenosine	Nta03g35020	-0.727367	0.00734356
N6-Threonylcarbamoyladenosine	Nta03g35020	-0.911771	3.62527e-05
Nigellimine N-oxide	Nta03g35020	0.794926	0.00200123
Gamma-Glu-Leu	Nta03g35020	0.845734	0.000527897
Isomorellinol	Nta03g35020	0.929508	1.21683e-05
Glycylprolylhydroxyproline	Nta03g35020	0.790536	0.00220721
Scabiolide	Nta03g35020	0.76287	0.00390272
Isoscopoletin	Nta03g35020	-0.928558	1.29894e-05
Phe Trp Ser	Nta03g35020	-0.787622	0.00235264
N-(2-Carboxyphenyl)retinamide	Nta03g35020	0.89809	7.27943e-05
12-O-Benzoylisolineolon	Nta03g35020	-0.823466	0.000995747
Trifochalcanoloside I	Nta03g35020	0.780915	0.00271508
Wahlenoside A	Nta03g35020	-0.556305	0.060326
(+)-Oxyglutinosone	Nta03g35020	-0.806819	0.0015166
Erythro-carolignan E	Nta03g35020	-0.9019	6.05667e-05
4-Methylumbelliferyl beta-D-glucuronide	Nta03g35020	-0.887753	0.000115901
carbidopa	Nta03g35020	-0.669686	0.0172024
H-Thr-Phe-OH	Nta03g35020	0.608286	0.0358471
FA 18:2+1O	Nta03g35020	0.892457	9.43386e-05
rel-Cyclo-(Pro-Pro-Ala-Gly-Leu-Ala-Thr-Phe)	Nta03g35020	-0.848104	0.000490625
Podorhizol beta-D-glucoside	Nta03g35020	-0.730566	0.00696401
Thr Leu	Nta03g35020	0.662894	0.0188007
Vicibactin-7101	Nta03g35020	-0.866956	0.000261469
1-Methylguanosine	Nta03g35020	0.929308	1.23373e-05
Neuromedin B (1-3)	Nta03g35020	0.602703	0.0380582
Picrocrocin	Nta03g35020	-0.764778	0.00376128
(6R,9S)-3-Oxo-alpha-ionol beta-D-glucoside	Nta03g35020	-0.810308	0.00139322
anthraniloyl-O-glucose	Nta03g35020	-0.827892	0.000883966
Pyrogallol-2-O-glucuronide	Nta03g35020	0.843999	0.000556532
Tricetin	Nta03g35020	0.886116	0.00012425
Rhyncoside A	Nta03g35020	-0.847584	0.00049861
2-(3,4,5-Trimethoxyphenyl)-5,6,7,8-tetramethoxy-4H-1-benzopyran-4-one	Nta03g35020	0.794662	0.00201316
Dihydrotricetin 7,3'-dimethyl ether	Nta03g35020	-0.490404	0.105519
Linaride	Nta03g35020	-0.80437	0.00160811
Corymbiferan lactone A	Nta03g35020	-0.793279	0.0020767
2-Thiophenecarboxaldehyde	Nta03g35020	-0.827111	0.000902956
Cephaeline	Nta03g35020	0.637953	0.0256099
Thymoquinol 2-O-beta-glucopyranoside	Nta03g35020	-0.691001	0.012831
4-Isopropyl-2,4,6-cycloheptatrien-1-one	Nta03g35020	-0.886341	0.000123075
Kunzeaphlogin A	Nta03g35020	-0.922536	1.92681e-05
3-[(3-Methylbutyl)nitrosoamino]-2-butanone	Nta03g35020	0.850483	0.000455297
Norsanguinine	Nta03g35020	-0.803704	0.0016337
N-Acetyl-leucyl-leucine	Nta03g35020	0.833441	0.000757822
2-Thiouridine	Nta03g35020	-0.506333	0.0930063
Palythoalone A	Nta03g35020	-0.854987	0.000393847
Padmatin 5-glucoside	Nta03g35020	0.788013	0.00233271
12-Oxocurvularin	Nta03g35020	-0.913201	3.34914e-05
Vardenafil	Nta03g35020	-0.830054	0.000833018
1-O-Cinnamoyl-beta-D-gentiobiose	Nta03g35020	-0.939892	5.58361e-06
Sodwanone L	Nta03g35020	0.848455	0.000485284
Dibenzo[h,rst]pentaphene	Nta03g35020	-0.705548	0.0103614
Pro Glu Ile	Nta03g35020	0.849529	0.000469216
Lys Leu	Nta03g35020	0.580175	0.0479724
Matairesinol	Nta03g35020	-0.862816	0.000302549
Tormentic acid	Nta03g35020	-0.781866	0.00266128
Estriol 3-sulfate	Nta03g35020	-0.757521	0.00432067
Lys Leu Asp	Nta03g35020	0.605205	0.0370556
Ajubractin D	Nta03g35020	0.856301	0.000377196
fagopyritol A2	Nta03g35020	-0.793571	0.00206317
Sphenalactone B	Nta03g35020	-0.814666	0.00125008
Eriojaposide A	Nta03g35020	-0.84071	0.000614141
2-Carboxybenzaldehyde	Nta03g35020	-0.870836	0.000227036
H-PHE-ASP-OH	Nta03g35020	0.926984	1.44461e-05
Dolichol phosphate	Nta03g35020	0.680086	0.0149518
Sesbanimide A	Nta03g35020	-0.887419	0.000117569
Thielavin E	Nta03g35020	-0.784085	0.00253883
Guanosine-3',5'-cyclic monophosphate	Nta03g35020	0.762508	0.00392997
2-Amino-4-(2-aminophenyl)-4-oxobutanoic acid	Nta03g35020	-0.744227	0.00550597
2-Methyl-trans-aconitate	Nta03g35020	-0.713426	0.00918177
Hexadecanedioic acid	Nta03g35020	0.591795	0.0426557
Bactobolin	Nta03g35020	-0.737361	0.00620663
Secobarbital	Nta03g35020	-0.375235	0.229394
Tinosposinenside B	Nta03g35020	0.891357	9.90735e-05
Asparaginyl-Valine	Nta03g35020	0.648497	0.0225439
Pro Phe Asn	Nta03g35020	0.675028	0.0160175
CLONIXIN	Nta03g35020	-0.917454	2.62444e-05
Dodecafluoropentane	Nta03g35020	0.887506	0.000117136
5-(4-Acetoxybut-1-ynyl)-2,2'-bithiophene	Nta03g35020	-0.887487	0.000117228
PA(18:1(11Z)/19:0)	Nta03g35020	-0.777298	0.00292746
Piclamilast	Nta03g35020	-0.749886	0.00497485
Leu Ile Asn	Nta03g35020	0.924391	1.71232e-05
3-(prop-2-enoate)-o-benzoquinone	Nta03g35020	-0.866776	0.000263155
(+)-Jasplakinolide Z1	Nta03g35020	-0.872168	0.000216077
Pentandroside C	Nta03g35020	0.752066	0.0047809
PHENOLPHTHALEIN	Nta03g35020	-0.752405	0.00475128
Lancerin	Nta03g35020	-0.792114	0.0021314
N-Phenylacetylaspartic acid	Nta03g35020	-0.785024	0.00248836
PA(18:2(9Z,11E)+=O(13)/a-25:0)	Nta03g35020	-0.773936	0.00313589
Palau'imide	Nta03g35020	0.896905	7.69707e-05
Dendronesterol B	Nta03g35020	-0.858477	0.000350829
Androstan-3alpha,17beta-diol	Nta03g35020	-0.836675	0.000691014
L-Aspartic acid	Nta03g35020	0.843883	0.000558503
2-Hydroxy-3-(beta-D-xylopyranosyloxy)benzoic acid	Nta03g35020	-0.695898	0.0119557
Fraxetin	Nta03g35020	-0.697942	0.0116039
Deacetylasperulosidic Acid	Nta03g35020	-0.780732	0.00272556
Methyl 2-(4-isopropyl-4-methyl-5-oxo-2-imidazolin-2-yl)-p-toluate	Nta03g35020	-0.834679	0.00073167
FMN	Nta03g35020	0.90488	5.21775e-05
Desfesoterodine	Nta03g35020	0.922521	1.92862e-05
Devazepide	Nta03g35020	-0.837318	0.000678282
Cannabisin C	Nta03g35020	0.897772	7.38986e-05
(+)-Rishirilide B	Nta03g35020	0.707023	0.0101325
Fungichromin	Nta03g35020	-0.892614	9.36779e-05
Ile Thr Phe	Nta03g35020	0.914528	3.10794e-05
4-Guanidinobutanal	Nta03g35020	0.782505	0.00262557
PA(20:4(8Z,11Z,14Z,17Z)/20:3(6,8,11)-OH(5))	Nta03g35020	0.706783	0.0101694
Speradine G	Nta03g35020	-0.67987	0.0149962
8-Hydroxyluteolin 8-gentiobioside	Nta03g35020	0.631553	0.027612
4-(Dimethylamino)butyl carbamimidothioate	Nta03g35020	0.79395	0.0020457
Topsentisterol B1	Nta03g35020	-0.759474	0.00416432
Nocardamine	Nta03g35020	-0.814142	0.00126667
Maculosin	Nta03g35020	-0.799812	0.00178963
Fluocinonide	Nta03g35020	-0.792774	0.00210028
Gln Leu Leu	Nta03g35020	0.942438	4.51639e-06
Sachaloside VII	Nta03g35020	-0.699247	0.0113832
Chlorphenoxamine	Nta03g35020	-0.759964	0.00412577
Tyr Gln Phe	Nta03g35020	-0.751252	0.00485264
Euphodendrophane E	Nta03g35020	-0.929773	1.19465e-05
Strictoloside	Nta03g35020	-0.808647	0.00145096
Rubescensin M	Nta03g35020	-0.722596	0.00793837
9-(2,3-dihydroxypropoxy)-9-oxononanoic acid	Nta03g35020	-0.830147	0.000830897
4-(beta-D-glucosyloxy)-3-hydroxy-benzoic acid	Nta03g35020	-0.829705	0.000841103
Virescenoside R	Nta03g35020	0.682585	0.0144449
Leu-Val-Gly	Nta03g35020	0.729334	0.00710835
12S-HHTrE	Nta03g35020	0.640596	0.0248145
3,3'-Dihydroxyisorenieratene	Nta03g35020	0.81332	0.00129304
Tetradecanoylcarnitine	Nta03g35020	0.853369	0.000415125
4-Hydroxyestrone sulfate	Nta08g22610	-0.913984	3.20521e-05
Domperidone	Nta08g22610	-0.881305	0.000151534
Tinosinenside	Nta08g22610	-0.878305	0.00017078
Chloriolide	Nta08g22610	0.818784	0.0011255
GLY-GLY-ILE	Nta08g22610	0.916908	2.70983e-05
Pterocellin F	Nta08g22610	-0.862621	0.000304601
H-ILE-TRP-OH	Nta08g22610	0.90281	5.78998e-05
Rutaevin	Nta08g22610	-0.873893	0.000202495
Ser Ser Ile	Nta08g22610	0.908063	4.42555e-05
Trp Gly	Nta08g22610	0.901274	6.24555e-05
Citrifolinin B epimer b	Nta08g22610	-0.814779	0.00124654
beta-Alanyl-L-arginine	Nta08g22610	0.930403	1.14326e-05
Ketobemidone	Nta08g22610	0.514513	0.0869872
Jatamanvaltrate H	Nta08g22610	-0.809284	0.00142861
Tetradecyl iodide	Nta08g22610	-0.901759	6.09869e-05
Acetyl tributyl citrate	Nta08g22610	0.894943	8.42885e-05
Phenylalanylserine	Nta08g22610	0.863549	0.000294931
DIMBOA-Glc	Nta08g22610	-0.901949	6.04215e-05
2',3'-Dideoxyadenosine	Nta08g22610	-0.8782	0.000171485
H-TRP-ALA-OH	Nta08g22610	0.889933	0.000105477
Anthothecanolide	Nta08g22610	-0.879904	0.000160293
Pulcherrin C	Nta08g22610	-0.871537	0.000221218
Alnustone	Nta08g22610	-0.913993	3.20351e-05
Phe Gly Ile	Nta08g22610	0.89276	9.30659e-05
Tinocordiside	Nta08g22610	-0.864143	0.000288869
lysine tyrosylquinone	Nta08g22610	0.868465	0.00024762
2-OH-C16 :0 Ceramide	Nta08g22610	0.906465	4.81049e-05
Coumanolignan	Nta08g22610	-0.812098	0.00133297
Pyramidatin D	Nta08g22610	0.763801	0.00383324
5'-N-Methylcarboxamidoadenosine	Nta08g22610	0.901384	6.212e-05
Lysylphenylalanine	Nta08g22610	0.858387	0.000351898
Lys Ile Ile	Nta08g22610	0.803505	0.00164142
5,8-Dimethoxymaculine	Nta08g22610	-0.817143	0.00117394
Valyllysine	Nta08g22610	0.863262	0.000297892
Phe-Asn	Nta08g22610	0.88391	0.000136237
Ala Leu Leu	Nta08g22610	0.896732	7.75928e-05
(+)-argemonine	Nta08g22610	-0.800593	0.00175747
Plagiospirolide E	Nta08g22610	-0.757915	0.00428878
Ala Gly Leu	Nta08g22610	0.835413	0.000716502
Nordihydrocapsaicin	Nta08g22610	0.922816	1.89309e-05
Dimethoxane	Nta08g22610	-0.908914	4.23063e-05
His Glu Asn	Nta08g22610	-0.814708	0.00124877
Ser Ile Phe	Nta08g22610	0.860832	0.000323934
Cuspidiol	Nta08g22610	-0.823176	0.00100342
Cheiradone	Nta08g22610	-0.900842	6.37869e-05
(2R,3R)-3-Methylglutamyl-5-semialdehyde-N6-lysine	Nta08g22610	0.836237	0.000699775
tryptoquialanol	Nta08g22610	-0.770357	0.0033701
beta-Aflatrem	Nta08g22610	0.900204	6.57913e-05
Asp Val Leu	Nta08g22610	0.938942	6.02911e-06
Leu-Val-Ser	Nta08g22610	0.904246	5.38796e-05
Arg Leu	Nta08g22610	0.852892	0.000421563
LysoPE(20:4)	Nta08g22610	0.916647	2.75143e-05
Thr Leu Thr	Nta08g22610	0.911658	3.64798e-05
H-LEU-LEU-GLY-OH	Nta08g22610	0.90755	4.54633e-05
Thr-Trp	Nta08g22610	0.862084	0.000310306
Lactulose	Nta08g22610	-0.848763	0.000480625
Gabaculine	Nta08g22610	-0.813618	0.00128342
Histidylleucine	Nta08g22610	0.865299	0.000277351
11beta,13-dihydrolactucin 15-oxalate	Nta08g22610	0.690399	0.0129419
Gly Phe Val	Nta08g22610	0.908994	4.21268e-05
(R)-(Homo)3-citrate	Nta08g22610	-0.914331	3.14284e-05
L-Alanyl-L-proline	Nta08g22610	0.913352	3.321e-05
Leu-Ala-Ser	Nta08g22610	0.864831	0.000281966
Ile Ile Asp	Nta08g22610	0.896813	7.73004e-05
Trp-Ala-Gly	Nta08g22610	0.897695	7.41657e-05
Asn Val Leu	Nta08g22610	0.915936	2.86716e-05
Pandangolide 1	Nta08g22610	0.880152	0.00015872
(-)-7-Hydroxylariciresinol 9'-p-coumarate	Nta08g22610	-0.832581	0.000776392
(+)-8-Acetoxycarvone	Nta08g22610	0.847167	0.000505102
3-Oxo-11,13(18)-oleandien-28-oic acid	Nta08g22610	-0.765448	0.00371259
gamma-Hydroxy-3-pyridinebutanoate	Nta08g22610	-0.864738	0.000282898
H-MET-MET-OH	Nta08g22610	-0.853397	0.000414757
Phe Gly	Nta08g22610	0.865815	0.000272325
3-Hydroxybibenzyl	Nta08g22610	-0.818589	0.0011312
Papuanone	Nta08g22610	0.853053	0.000419386
HQNO	Nta08g22610	0.319025	0.312145
4'-Hydroxy-3,5,8,3'-tetramethoxy-7-prenyloxyflavone	Nta08g22610	-0.81606	0.0012068
PMEG	Nta08g22610	-0.758921	0.00420814
Cysteinylglycine	Nta08g22610	-0.746804	0.00525913
Arteannuin B	Nta08g22610	-0.850322	0.000457618
Brachystemidine B	Nta08g22610	-0.922451	1.9371e-05
(S)-Furanopetasitin	Nta08g22610	-0.886602	0.000121725
Tetrahydrocurcumin	Nta08g22610	-0.85682	0.000370775
Dictamnoside L	Nta08g22610	-0.864544	0.000284832
Asp Thr Leu	Nta08g22610	0.923827	1.77539e-05
Crispine A	Nta08g22610	0.707765	0.0100187
Chlorochrymorin	Nta08g22610	-0.855495	0.000387348
2-Oxoglutarate	Nta08g22610	-0.88501	0.000130149
Aminobutyl benzamide	Nta08g22610	0.7209	0.00815821
Glucovanillin	Nta08g22610	-0.821045	0.00106132
Leu Leu Gln	Nta08g22610	0.869724	0.000236519
Ghalakinoside	Nta08g22610	-0.857195	0.00036619
Alanylhydroxyproline	Nta08g22610	0.835238	0.000720112
Phe-arg	Nta08g22610	0.875912	0.000187456
Catalpol	Nta08g22610	-0.858167	0.000354495
Val Asp Leu	Nta08g22610	0.918915	2.40627e-05
Salbostatin	Nta08g22610	-0.862595	0.00030487
Cholestenone	Nta08g22610	-0.828914	0.000859597
3-Hydroxyhippuric acid	Nta08g22610	-0.862693	0.000303843
Dendromoniliside A	Nta08g22610	-0.860005	0.000333187
Evocalcet	Nta08g22610	0.908479	4.32934e-05
Lophanthoidin F	Nta08g22610	0.898093	7.27837e-05
Dictyoquinazol A	Nta08g22610	0.897161	7.60535e-05
Leu-Thr-Ser	Nta08g22610	0.824406	0.000971145
Thr Leu Ile	Nta08g22610	0.892967	9.22032e-05
N-Acetyl-glutamine	Nta08g22610	0.835019	0.000724615
Ser Ile Ala	Nta08g22610	0.874592	0.000197187
H-Leu-Asn-OH	Nta08g22610	0.898816	7.03273e-05
Acanthoglabrolide	Nta08g22610	-0.81113	0.00136529
Rehmannioside C	Nta08g22610	-0.856242	0.00037793
Anthosterone B	Nta08g22610	-0.852857	0.000422043
Ala-Leu-Leu-Asp	Nta08g22610	0.880307	0.000157737
Ancistrogriffithine A	Nta08g22610	-0.918253	2.50329e-05
Ingenol Mebutate	Nta08g22610	0.920903	2.13266e-05
PYRAOXYSTROBIN	Nta08g22610	-0.840605	0.000616055
Tryptophyl-Isoleucine	Nta08g22610	0.745471	0.00538573
Pro Ile Ala	Nta08g22610	0.875116	0.000193274
Ile Glu Leu	Nta08g22610	0.951595	1.92912e-06
Triptofordin D 1	Nta08g22610	-0.87998	0.000159812
Ala Leu Glu	Nta08g22610	0.891574	9.81262e-05
p-Menth-1-ene-3,4-diol 4-O-beta-glucopyranoside	Nta08g22610	0.925129	1.6324e-05
Obliquine	Nta08g22610	0.895239	8.31505e-05
Tiruchanduramine	Nta08g22610	-0.81288	0.0013073
Genipin	Nta08g22610	-0.8146	0.00125216
6beta-Hydroxyhuperzine A	Nta08g22610	-0.844038	0.000555884
Atractyloside A	Nta08g22610	-0.746949	0.00524549
Ser Leu Ile	Nta08g22610	0.868727	0.000245276
Formylfusarochromanone	Nta08g22610	-0.867647	0.00025505
Astellolide B	Nta08g22610	-0.859101	0.000343537
zinolol	Nta08g22610	-0.827927	0.000883117
Tyr Leu	Nta08g22610	0.886137	0.00012414
Verbenalin	Nta08g22610	-0.8982	7.24191e-05
Ixoside	Nta08g22610	-0.931895	1.02851e-05
Phe-Ala-Gly	Nta08g22610	0.861345	0.000318293
DL-Leucyl-DL-phenylalanine	Nta08g22610	0.874217	0.000200019
Ile Ile	Nta08g22610	0.898034	7.29886e-05
Glidobactin D	Nta08g22610	-0.871374	0.000222562
Val Ile Leu	Nta08g22610	0.901893	6.05884e-05
Met Leu	Nta08g22610	0.847218	0.000504309
Phe-Ala-Asp	Nta08g22610	0.863943	0.0002909
Terragine E	Nta08g22610	0.702132	0.0109065
Picfeltarraenin IB	Nta08g22610	0.575099	0.0504349
Succinylaminoimidazole carboxamide riboside	Nta08g22610	-0.889095	0.000109394
Isothalicrine	Nta08g22610	0.815749	0.00121633
Ascochalasin	Nta08g22610	-0.820955	0.00106381
Thr Glu	Nta08g22610	0.902768	5.80223e-05
Asp-Trp	Nta08g22610	0.782345	0.00263444
Garajonone	Nta08g22610	-0.802671	0.00167403
Eriotriochin	Nta08g22610	-0.779439	0.00280026
Ala-Leu-Val-Ser	Nta08g22610	0.786296	0.00242118
Nitropyrrolin D	Nta08g22610	0.352837	0.260607
D-Phe-Pro-Arg-CH2Cl	Nta08g22610	0.963143	5.03471e-07
Circinamide	Nta08g22610	0.883374	0.000139279
Spinanine A	Nta08g22610	-0.783686	0.00256054
1,3-Dihydroxy-1-(4-hydroxy-3,5-dimethoxyphenyl)propan-2-one	Nta08g22610	-0.832161	0.00078559
H-Val-Tyr-OH	Nta08g22610	0.85533	0.000389448
1-Methyl-2-hydroadenosine	Nta08g22610	0.907067	4.66247e-05
3-(4-hydroxy-3-methoxyphenyl)propanoate	Nta08g22610	-0.900035	6.63335e-05
Glu-Ile-Val	Nta08g22610	0.880143	0.000158772
Asn-Tyr	Nta08g22610	0.862428	0.000306641
TXB1	Nta08g22610	-0.862975	0.00030088
Consabatine	Nta08g22610	0.790659	0.00220124
3-Hydroxy-prazepam	Nta08g22610	-0.845208	0.000536456
Ile Phe Asp	Nta08g22610	0.946869	3.0489e-06
Lys Val Leu	Nta08g22610	0.882951	0.000141721
Repandin D	Nta08g22610	-0.789727	0.00224688
3-Methyldioxyindole	Nta08g22610	-0.87086	0.000226834
6-O-Veratroylcatalpol	Nta08g22610	0.650921	0.0218787
(+)-7alpha,8alpha-Epoxyblumenol B	Nta08g22610	0.831186	0.000807286
Euperfolitin	Nta08g22610	-0.813647	0.0012825
Phenylalanyltryptophan	Nta08g22610	0.869306	0.000240166
Syringopicroside	Nta08g22610	-0.827218	0.000900323
Lysylserine	Nta08g22610	0.93411	8.75105e-06
Leu-Thr-Ala	Nta08g22610	0.893756	8.89749e-05
Oxostephamiersine	Nta08g22610	-0.72992	0.00703947
Esculin	Nta08g22610	-0.821805	0.00104036
Etravirine	Nta08g22610	0.847334	0.0005025
Madecassoside	Nta08g22610	-0.815226	0.00123255
Aucubin	Nta08g22610	-0.862274	0.000308283
Cenocladamide	Nta08g22610	-0.867606	0.000255427
L-Leucyl-L-alanine	Nta08g22610	0.787242	0.00237212
Eletriptan	Nta08g22610	-0.879601	0.000162245
Stachyline D	Nta08g22610	0.802219	0.00169191
Corchoionoside C	Nta08g22610	-0.819496	0.00110497
Val Arg	Nta08g22610	0.921409	2.06707e-05
Glu-Asp-Ile	Nta08g22610	0.92094	2.12776e-05
Salvadione C	Nta08g22610	0.855002	0.000393658
Diprotin A	Nta08g22610	0.897955	7.32636e-05
Javanicoside B	Nta08g22610	-0.838403	0.000657234
Gardenoside	Nta08g22610	-0.852319	0.000429407
Isostephodeline	Nta08g22610	-0.849094	0.000475668
Ile Pro Val	Nta08g22610	0.864824	0.000282041
Kahakamide A	Nta08g22610	-0.80195	0.00170262
Toddaliopsin A	Nta08g22610	-0.861326	0.000318505
Aminophenazone	Nta08g22610	0.822261	0.00102796
His Phe	Nta08g22610	0.873724	0.000203797
Cardiospermin	Nta08g22610	-0.883924	0.000136155
Allopurinol riboside	Nta08g22610	-0.775576	0.00303284
H-Ser-Leu-OH	Nta08g22610	0.869249	0.000240662
Stilbostemin H 3'-beta-D-glucopyranoside	Nta08g22610	-0.89517	8.34167e-05
(+)-Galwesine	Nta08g22610	0.872427	0.00021399
1beta-(3-Hydroxy-4,5-dimethoxyphenyl)-O-glucopyranoside	Nta08g22610	-0.870497	0.000229895
Bistratamide B	Nta08g22610	-0.838553	0.000654359
Cedryl acetate	Nta08g22610	0.906862	4.71246e-05
Litsenolide C1	Nta08g22610	0.873085	0.000208767
Myrothenone A	Nta08g22610	-0.850129	0.000460415
Trichodepsipeptide A	Nta08g22610	-0.847002	0.000507695
Melampodinin B	Nta08g22610	0.761253	0.00402569
Ser Ile Ser	Nta08g22610	0.743086	0.00561807
Barlerin	Nta08g22610	-0.895609	8.17452e-05
Glu Glu Ile	Nta08g22610	0.917491	2.6186e-05
(-)-Taylorione	Nta08g22610	-0.788965	0.0022847
S-Adenosyl-L-methionine	Nta08g22610	0.676638	0.0156723
Chaetoquadrin E	Nta08g22610	0.805597	0.00156176
Methyl gallate 3-O-beta-D-glucopyranoside	Nta08g22610	-0.944681	3.71681e-06
7-Oxostaurosporine	Nta08g22610	-0.910149	3.95988e-05
Isoleucine	Nta08g22610	0.848703	0.000481537
Phenylalanylalanine	Nta08g22610	0.859257	0.000341737
Arg Val Leu	Nta08g22610	0.871874	0.00021846
alcaligin	Nta08g22610	0.887924	0.000115055
Methyl syringate	Nta08g22610	0.743677	0.00555978
Tuliposide A	Nta08g22610	-0.790047	0.00223112
Latrunculin B	Nta08g22610	-0.861086	0.000321133
13(S)-HODE	Nta08g22610	0.899795	6.71029e-05
Leu-Asp-Ser	Nta08g22610	0.856822	0.000370743
Isochondrodendrine	Nta08g22610	0.75889	0.00421062
4-Methylantirrhinoside	Nta08g22610	-0.83992	0.000628641
Guineamide D	Nta08g22610	-0.909743	4.04732e-05
Anagliptin	Nta08g22610	0.424499	0.168996
H-PHE-LEU-OH	Nta08g22610	0.855131	0.000391997
Stellatoside B	Nta08g22610	-0.795759	0.00196384
Leu Ala Lys	Nta08g22610	0.797448	0.00188973
Pipacycline	Nta08g22610	-0.690871	0.012855
ent-15-Kaurene-17,19-dioic acid	Nta08g22610	0.872229	0.000215584
Lappaol D	Nta08g22610	-0.833743	0.000751377
Rossicasin A	Nta08g22610	-0.68157	0.0146492
Pro Arg Leu	Nta08g22610	0.871671	0.000220116
cis-(Homo)3-aconitate	Nta08g22610	-0.7999	0.00178598
Chabrolol B	Nta08g22610	0.953178	1.63804e-06
PA(22:5(7Z,10Z,13Z,16Z,19Z)/15:0)	Nta08g22610	0.829694	0.000841354
(+)-Quebrachidine	Nta08g22610	0.872393	0.000214264
Irisoquin	Nta08g22610	0.775167	0.00305831
Dehydrooreadone	Nta08g22610	-0.812789	0.00131027
Valtrate hydrine B3	Nta08g22610	-0.792867	0.00209589
Paulownioside	Nta08g22610	-0.919294	2.35211e-05
6-O-(4-Hydroxybenzoyl)-ajugol	Nta08g22610	0.822937	0.0010098
Pharboside G	Nta08g22610	0.859454	0.000339472
Clindamycin	Nta08g22610	0.92454	1.69598e-05
5'-Methylthioadenosine	Nta08g22610	0.802527	0.00167973
Indole-3-acetaldoxime	Nta08g22610	-0.91962	2.30617e-05
(R)-2-Hydroxy-7,8-dimethoxy-2H-1,4-benzoxazin-3(4H)-one 2-glucoside	Nta08g22610	-0.913241	3.34174e-05
(R)-8-Methylsulfinyloctyl isothiocyanate	Nta08g22610	-0.880131	0.000158849
Spongianolide E	Nta08g22610	-0.85464	0.000398344
Glu-Ile-Ser	Nta08g22610	0.888088	0.000114252
Irisoid E	Nta08g22610	0.703863	0.0106277
Lysylglutamic acid	Nta08g22610	0.851468	0.000441254
Benzoylagmatine	Nta08g22610	-0.914193	3.16759e-05
Leuhistin	Nta08g22610	0.858337	0.00035248
1-Benzylpiperazine	Nta08g22610	-0.803108	0.00165687
L-Xylulose	Nta08g22610	-0.907573	4.54084e-05
DG(18:4(6Z,9Z,12Z,15Z)/15:0/0:0)	Nta08g22610	0.801678	0.00171351
Dahuribirin F	Nta08g22610	-0.83693	0.000685929
(-)-Chrysogine	Nta08g22610	-0.741709	0.00575565
Nanjiol B	Nta08g22610	-0.886094	0.000124367
beta-fenchocamphorone	Nta08g22610	-0.846937	0.000508712
Garenoxacin	Nta08g22610	-0.850281	0.000458219
Curcumol	Nta08g22610	-0.880151	0.000158722
Hyperoside	Nta08g22610	0.833772	0.000750746
pre-putrebactin	Nta08g22610	0.861378	0.000317937
7-Methoxy-1,2,3,4-tetrahydroacridin-9-amine	Nta08g22610	0.771829	0.00327222
Cryptophorine	Nta08g22610	-0.700423	0.011187
Stachysoside A	Nta08g22610	-0.816933	0.00118026
DG(PGD2/0:0/i-18:0)	Nta08g22610	0.879134	0.000165277
H-MET-TRP-OH	Nta08g22610	0.897831	7.36916e-05
Mallotophenone	Nta08g22610	-0.899661	6.75394e-05
H-LEU-LEU-ALA-OH	Nta08g22610	0.846773	0.000511284
Ramiprilat	Nta08g22610	0.929039	1.25682e-05
1-Hydroxycarvedilol	Nta08g22610	0.680304	0.014907
N-Benzyloxycarbonylglycine	Nta08g22610	-0.828595	0.000867151
7-Hydroxy-3,5,8-trimethoxy-3',4'-methylenedioxyflavone	Nta08g22610	-0.877247	0.000178004
N6-Methyladenosine	Nta08g22610	0.881724	0.000148984
Aspartylphenylalanine	Nta08g22610	0.851288	0.000443806
Pro Ile	Nta08g22610	-0.840046	0.000626307
4-Isopropyl-2-methylphenol	Nta08g22610	-0.86827	0.000249384
ciguatoxin IJKLM cyclic acetal	Nta08g22610	-0.876526	0.000183064
Arg Leu Ile	Nta08g22610	0.843928	0.000557731
Maryal	Nta08g22610	-0.825094	0.000953432
7-O-[alpha-L-rhamnosyl-(1->2)-beta-D-glucosyl]isovitexin	Nta08g22610	-0.898382	7.17941e-05
Ser Phe	Nta08g22610	0.780441	0.00274225
Scutebarbatine J	Nta08g22610	-0.801342	0.00172702
H-Ile-Tyr-OH	Nta08g22610	0.859864	0.000334792
Cucurbitacin I	Nta08g22610	-0.909765	4.04264e-05
7alpha-Hydroxyeurycomalactone	Nta08g22610	0.887013	0.000119618
Epimedoicarisoside A	Nta08g22610	-0.819192	0.00111371
Perphenazine	Nta08g22610	-0.808631	0.00145152
Chaetoglobosin N	Nta08g22610	-0.81777	0.00115526
Armillane	Nta08g22610	-0.847534	0.000499398
(3R,5R)-3-(((3R,5R)-3,5-dihydroxy decanoyl)oxy)-5-hydroxydecanoic acid	Nta08g22610	-0.933453	9.1858e-06
H-Phe-Val-OH	Nta08g22610	0.885734	0.000126265
Sulfocholic acid	Nta08g22610	0.85489	0.000395104
Tetranor-12R-HETE	Nta08g22610	0.757934	0.00428723
9-(alpha-D-glucosyl)dihydrozeatin	Nta08g22610	0.921543	2.05005e-05
5beta-Dihydrocortisol	Nta08g22610	0.908236	4.38526e-05
3-Mercaptolactate	Nta08g22610	-0.829536	0.000845008
13-Hydroxycapsidiol	Nta08g22610	-0.790428	0.00221247
Ile Ile Ser	Nta08g22610	0.883019	0.000141324
Clotrimazole	Nta08g22610	-0.783429	0.00257458
Globulusin B	Nta08g22610	-0.743005	0.0056261
11-Meo-fes	Nta08g22610	0.917818	2.56868e-05
6-Oxabicyclo[3.1.0]hexane-2-undecanoic acid methyl ester	Nta08g22610	0.894158	8.73665e-05
Ptaquiloside	Nta08g22610	-0.786452	0.002413
Kanzonol S	Nta08g22610	-0.902879	5.77003e-05
CADALENE	Nta08g22610	-0.779295	0.00280871
Cyclo(phenylalanyl-prolyl)	Nta08g22610	-0.881882	0.000148035
Trp Phe Glu	Nta08g22610	-0.841633	0.000597532
Val Val Ile	Nta08g22610	0.887503	0.00011715
Trimethobenzamide	Nta08g22610	0.904985	5.18999e-05
Leu Ile Thr	Nta08g22610	0.825703	0.000937963
Cyanofenphos	Nta08g22610	0.782914	0.00260288
Kadsuphilol G	Nta08g22610	-0.853117	0.000418519
S-Methyl-methionine	Nta08g22610	0.528326	0.0774316
Glycyl-L-leucine	Nta08g22610	0.778282	0.00286845
Leu-Leu-Asp	Nta08g22610	0.857735	0.000359656
2-thio-PAF	Nta08g22610	-0.875268	0.000192156
N-Benzylformamide	Nta08g22610	-0.85621	0.000378334
Alisol C 23-acetate	Nta08g22610	-0.753439	0.00466174
Virenamide A	Nta08g22610	-0.841082	0.000607413
Dihydrofusarubin	Nta08g22610	0.78693	0.0023882
Methyl-4-O-methylgallate	Nta08g22610	-0.845915	0.000524974
Procaine	Nta08g22610	0.774458	0.00310286
Quercimeritrin	Nta08g22610	0.787259	0.00237126
4-Carboxy-4-hydroxy-2-oxoadipate	Nta08g22610	-0.862481	0.000306076
21-Fluoro-16-ethyl-19-norprogesterone	Nta08g22610	0.889661	0.000106737
3-Ethyltoluene	Nta08g22610	-0.902793	5.79498e-05
Cichorioside N	Nta08g22610	-0.872564	0.000212898
H-PHE-PHE-OH	Nta08g22610	0.715611	0.00887322
Monensin B	Nta08g22610	-0.884848	0.000131034
Pyroglutamyl-Isoleucine	Nta08g22610	0.861489	0.000316731
Morin	Nta08g22610	0.776145	0.00299772
GroPIns	Nta08g22610	0.50839	0.0914672
Yunngnin A	Nta08g22610	-0.867392	0.000257402
Medicagenic acid 3-O-triglucoside	Nta08g22610	-0.786095	0.00243168
5-epi-Valiolol 7-phosphate	Nta08g22610	-0.836284	0.000698822
Lactose 6-phosphate	Nta08g22610	-0.846182	0.000520681
Scutianine J	Nta08g22610	-0.753945	0.00461838
4Z,7Z,10Z,13Z-hexadecatetraenoic acid	Nta08g22610	0.765357	0.00371916
Pseudostellarin B	Nta08g22610	-0.805711	0.00155747
cotinine-glucuronide	Nta08g22610	-0.892754	9.30906e-05
H-Val-Met-OH	Nta08g22610	0.846623	0.000513655
L-Alanyl-L-leucine	Nta08g22610	0.853802	0.000409344
Arg Asp Met	Nta08g22610	-0.795099	0.00199342
Gossypol	Nta08g22610	-0.825933	0.00093217
DG(i-16:0/0:0/PGD2)	Nta08g22610	0.755108	0.00451993
Theogallin	Nta08g22610	-0.86876	0.000244986
Debromohymenialdisine	Nta08g22610	0.772504	0.00322811
2-keto palmitic acid	Nta08g22610	0.930546	1.13188e-05
Striatisporin A	Nta08g22610	0.801346	0.00172688
Bungeiside B	Nta08g22610	-0.913565	3.28161e-05
Asp-Leu-Val-Ser	Nta08g22610	0.924846	1.66278e-05
alpha-Ionol O-[arabinosyl-(1->6)-glucoside]	Nta08g22610	0.886453	0.000122495
Voriconazole	Nta08g22610	-0.917204	2.66319e-05
Cimiracemoside D	Nta08g22610	0.822136	0.00103136
Garcinolic Acid	Nta08g22610	-0.891596	9.80286e-05
Cryptotanshinone	Nta08g22610	0.757275	0.00434064
Semilepidinoside B	Nta08g22610	-0.907823	4.48182e-05
3,3-Bis(4-hydroxyphenyl)pentane	Nta08g22610	0.617518	0.0323941
Dianthoside	Nta08g22610	-0.78543	0.00246673
LOLIOLIDE	Nta08g22610	-0.831359	0.000803391
Melissoidesin D	Nta08g22610	-0.860366	0.000329126
8-MeSO-octyl-CN	Nta08g22610	0.831365	0.000803264
Cachineside I	Nta08g22610	-0.789883	0.00223918
Kinetensin 1-3	Nta08g22610	0.803719	0.00163313
Jerantinine H	Nta08g22610	0.81563	0.00122003
Cytisoside	Nta08g22610	-0.725359	0.0075897
7-Deazaadenosine	Nta08g22610	-0.745331	0.00539919
N6-Threonylcarbamoyladenosine	Nta08g22610	-0.906399	4.82688e-05
Nigellimine N-oxide	Nta08g22610	0.576988	0.0495087
Gamma-Glu-Leu	Nta08g22610	0.91105	3.77122e-05
Isomorellinol	Nta08g22610	0.832139	0.000786083
Glycylprolylhydroxyproline	Nta08g22610	0.863241	0.000298114
Scabiolide	Nta08g22610	0.608088	0.0359238
Isoscopoletin	Nta08g22610	-0.899259	6.88536e-05
Phe Trp Ser	Nta08g22610	-0.805291	0.00157319
N-(2-Carboxyphenyl)retinamide	Nta08g22610	0.927626	1.38368e-05
12-O-Benzoylisolineolon	Nta08g22610	-0.822058	0.00103349
Trifochalcanoloside I	Nta08g22610	0.859939	0.00033394
Wahlenoside A	Nta08g22610	-0.531193	0.0755419
(+)-Oxyglutinosone	Nta08g22610	-0.793447	0.00206892
Erythro-carolignan E	Nta08g22610	-0.839793	0.000630996
4-Methylumbelliferyl beta-D-glucuronide	Nta08g22610	-0.829248	0.000851744
carbidopa	Nta08g22610	-0.78432	0.00252611
H-Thr-Phe-OH	Nta08g22610	0.777163	0.00293559
FA 18:2+1O	Nta08g22610	0.882011	0.000147258
rel-Cyclo-(Pro-Pro-Ala-Gly-Leu-Ala-Thr-Phe)	Nta08g22610	-0.863171	0.000298836
Podorhizol beta-D-glucoside	Nta08g22610	-0.741504	0.00577632
Thr Leu	Nta08g22610	0.829246	0.000851785
Vicibactin-7101	Nta08g22610	-0.873552	0.000205123
1-Methylguanosine	Nta08g22610	0.934142	8.7301e-06
Neuromedin B (1-3)	Nta08g22610	0.787398	0.00236407
Picrocrocin	Nta08g22610	-0.793558	0.00206378
(6R,9S)-3-Oxo-alpha-ionol beta-D-glucoside	Nta08g22610	-0.880865	0.000154241
anthraniloyl-O-glucose	Nta08g22610	-0.87275	0.000211415
Pyrogallol-2-O-glucuronide	Nta08g22610	0.722741	0.00791976
Tricetin	Nta08g22610	0.756993	0.00436371
Rhyncoside A	Nta08g22610	-0.818272	0.00114046
2-(3,4,5-Trimethoxyphenyl)-5,6,7,8-tetramethoxy-4H-1-benzopyran-4-one	Nta08g22610	0.908156	4.4039e-05
Dihydrotricetin 7,3'-dimethyl ether	Nta08g22610	-0.478931	0.115194
Linaride	Nta08g22610	-0.731344	0.00687396
Corymbiferan lactone A	Nta08g22610	-0.78236	0.00263361
2-Thiophenecarboxaldehyde	Nta08g22610	-0.774598	0.00309402
Cephaeline	Nta08g22610	0.818724	0.00112725
Thymoquinol 2-O-beta-glucopyranoside	Nta08g22610	-0.807003	0.0015099
4-Isopropyl-2,4,6-cycloheptatrien-1-one	Nta08g22610	-0.834611	0.000733101
Kunzeaphlogin A	Nta08g22610	-0.932733	9.6811e-06
3-[(3-Methylbutyl)nitrosoamino]-2-butanone	Nta08g22610	0.855443	0.000388006
Norsanguinine	Nta08g22610	-0.837122	0.000682141
N-Acetyl-leucyl-leucine	Nta08g22610	0.691725	0.0126987
2-Thiouridine	Nta08g22610	-0.510721	0.0897436
Palythoalone A	Nta08g22610	-0.886783	0.000120793
Padmatin 5-glucoside	Nta08g22610	0.733086	0.00667543
12-Oxocurvularin	Nta08g22610	-0.872625	0.000212412
Vardenafil	Nta08g22610	-0.864276	0.000287524
1-O-Cinnamoyl-beta-D-gentiobiose	Nta08g22610	-0.892861	9.26437e-05
Sodwanone L	Nta08g22610	0.796318	0.00193907
Dibenzo[h,rst]pentaphene	Nta08g22610	-0.830033	0.000833519
Pro Glu Ile	Nta08g22610	0.89759	7.45353e-05
Lys Leu	Nta08g22610	0.661832	0.0190602
Matairesinol	Nta08g22610	-0.835884	0.000706904
Tormentic acid	Nta08g22610	-0.80301	0.00166072
Estriol 3-sulfate	Nta08g22610	-0.877428	0.000176746
Lys Leu Asp	Nta08g22610	0.793014	0.00208904
Ajubractin D	Nta08g22610	0.67974	0.0150229
fagopyritol A2	Nta08g22610	-0.831653	0.000796826
Sphenalactone B	Nta08g22610	-0.903097	5.70794e-05
Eriojaposide A	Nta08g22610	-0.900662	6.43488e-05
2-Carboxybenzaldehyde	Nta08g22610	-0.808669	0.00145017
H-PHE-ASP-OH	Nta08g22610	0.798314	0.00185258
Dolichol phosphate	Nta08g22610	0.675088	0.0160045
Sesbanimide A	Nta08g22610	-0.889517	0.000107409
Thielavin E	Nta08g22610	-0.814315	0.00126119
Guanosine-3',5'-cyclic monophosphate	Nta08g22610	0.788243	0.00232102
2-Amino-4-(2-aminophenyl)-4-oxobutanoic acid	Nta08g22610	-0.851462	0.000441348
2-Methyl-trans-aconitate	Nta08g22610	-0.782673	0.00261625
Hexadecanedioic acid	Nta08g22610	0.811452	0.00135448
Bactobolin	Nta08g22610	-0.774915	0.00307409
Secobarbital	Nta08g22610	-0.375711	0.228757
Tinosposinenside B	Nta08g22610	0.745237	0.00540818
Asparaginyl-Valine	Nta08g22610	0.718519	0.0084746
Pro Phe Asn	Nta08g22610	0.74315	0.00561177
CLONIXIN	Nta08g22610	-0.93616	7.49789e-06
Dodecafluoropentane	Nta08g22610	0.814717	0.00124849
5-(4-Acetoxybut-1-ynyl)-2,2'-bithiophene	Nta08g22610	-0.937536	6.73992e-06
PA(18:1(11Z)/19:0)	Nta08g22610	-0.788931	0.00228644
Piclamilast	Nta08g22610	-0.79143	0.00216398
Leu Ile Asn	Nta08g22610	0.794859	0.00200428
3-(prop-2-enoate)-o-benzoquinone	Nta08g22610	-0.856144	0.000379157
(+)-Jasplakinolide Z1	Nta08g22610	-0.878622	0.000168658
Pentandroside C	Nta08g22610	0.726412	0.00745988
PHENOLPHTHALEIN	Nta08g22610	-0.730953	0.00691904
Lancerin	Nta08g22610	-0.778357	0.00286402
N-Phenylacetylaspartic acid	Nta08g22610	-0.842735	0.000578165
PA(18:2(9Z,11E)+=O(13)/a-25:0)	Nta08g22610	-0.74519	0.0054127
Palau'imide	Nta08g22610	0.846359	0.000517857
Dendronesterol B	Nta08g22610	-0.887916	0.000115099
Androstan-3alpha,17beta-diol	Nta08g22610	-0.831351	0.000803565
L-Aspartic acid	Nta08g22610	0.660792	0.0193165
2-Hydroxy-3-(beta-D-xylopyranosyloxy)benzoic acid	Nta08g22610	-0.722271	0.00798014
Fraxetin	Nta08g22610	-0.722411	0.0079621
Deacetylasperulosidic Acid	Nta08g22610	-0.877015	0.00017962
Methyl 2-(4-isopropyl-4-methyl-5-oxo-2-imidazolin-2-yl)-p-toluate	Nta08g22610	-0.893462	9.017e-05
FMN	Nta08g22610	0.935338	7.98218e-06
Desfesoterodine	Nta08g22610	0.86785	0.000253191
Devazepide	Nta08g22610	-0.756851	0.0043753
Cannabisin C	Nta08g22610	0.76159	0.00399984
(+)-Rishirilide B	Nta08g22610	0.827665	0.000889456
Fungichromin	Nta08g22610	-0.909825	4.02971e-05
Ile Thr Phe	Nta08g22610	0.838656	0.0006524
4-Guanidinobutanal	Nta08g22610	0.524217	0.0801953
PA(20:4(8Z,11Z,14Z,17Z)/20:3(6,8,11)-OH(5))	Nta08g22610	0.620354	0.0313831
Speradine G	Nta08g22610	-0.72987	0.00704534
8-Hydroxyluteolin 8-gentiobioside	Nta08g22610	0.397102	0.201188
4-(Dimethylamino)butyl carbamimidothioate	Nta08g22610	0.541622	0.0689363
Topsentisterol B1	Nta08g22610	-0.836252	0.00069947
Nocardamine	Nta08g22610	-0.770596	0.00335402
Maculosin	Nta08g22610	-0.843682	0.000561908
Fluocinonide	Nta08g22610	-0.78279	0.00260975
Gln Leu Leu	Nta08g22610	0.825261	0.000949158
Sachaloside VII	Nta08g22610	-0.684135	0.014137
Chlorphenoxamine	Nta08g22610	-0.894812	8.47992e-05
Tyr Gln Phe	Nta08g22610	-0.794946	0.00200032
Euphodendrophane E	Nta08g22610	-0.916411	2.78948e-05
Strictoloside	Nta08g22610	-0.867525	0.000256176
Rubescensin M	Nta08g22610	-0.716572	0.00874
9-(2,3-dihydroxypropoxy)-9-oxononanoic acid	Nta08g22610	-0.785053	0.00248682
4-(beta-D-glucosyloxy)-3-hydroxy-benzoic acid	Nta08g22610	-0.848497	0.000484641
Virescenoside R	Nta08g22610	0.830973	0.000812061
Leu-Val-Gly	Nta08g22610	0.807176	0.0015036
12S-HHTrE	Nta08g22610	0.801609	0.00171627
3,3'-Dihydroxyisorenieratene	Nta08g22610	0.718869	0.00842746
Tetradecanoylcarnitine	Nta08g22610	0.753516	0.00465513
4-Hydroxyestrone sulfate	Nta01g31980	-0.949772	2.31356e-06
Domperidone	Nta01g31980	-0.928343	1.31813e-05
Tinosinenside	Nta01g31980	-0.914255	3.15637e-05
Chloriolide	Nta01g31980	0.941295	4.97356e-06
GLY-GLY-ILE	Nta01g31980	0.935186	8.0738e-06
Pterocellin F	Nta01g31980	-0.905133	5.15106e-05
H-ILE-TRP-OH	Nta01g31980	0.936733	7.17428e-06
Rutaevin	Nta01g31980	-0.944416	3.80471e-06
Ser Ser Ile	Nta01g31980	0.931177	1.08253e-05
Trp Gly	Nta01g31980	0.896556	7.82322e-05
Citrifolinin B epimer b	Nta01g31980	-0.836143	0.000701671
beta-Alanyl-L-arginine	Nta01g31980	0.877664	0.000175126
Ketobemidone	Nta01g31980	0.738262	0.00611101
Jatamanvaltrate H	Nta01g31980	-0.855415	0.000388366
Tetradecyl iodide	Nta01g31980	-0.94329	4.19798e-06
Acetyl tributyl citrate	Nta01g31980	0.855499	0.000387294
Phenylalanylserine	Nta01g31980	0.910234	3.94183e-05
DIMBOA-Glc	Nta01g31980	-0.926262	1.51551e-05
2',3'-Dideoxyadenosine	Nta01g31980	-0.89561	8.17417e-05
H-TRP-ALA-OH	Nta01g31980	0.890094	0.000104735
Anthothecanolide	Nta01g31980	-0.932761	9.66162e-06
Pulcherrin C	Nta01g31980	-0.935855	7.67471e-06
Alnustone	Nta01g31980	-0.951061	2.03606e-06
Phe Gly Ile	Nta01g31980	0.903793	5.51237e-05
Tinocordiside	Nta01g31980	-0.909582	4.08248e-05
lysine tyrosylquinone	Nta01g31980	0.872664	0.0002121
2-OH-C16 :0 Ceramide	Nta01g31980	0.946531	3.14529e-06
Coumanolignan	Nta01g31980	-0.852104	0.000432373
Pyramidatin D	Nta01g31980	0.899314	6.86738e-05
5'-N-Methylcarboxamidoadenosine	Nta01g31980	0.898609	7.1023e-05
Lysylphenylalanine	Nta01g31980	0.876466	0.000183485
Lys Ile Ile	Nta01g31980	0.903811	5.50743e-05
5,8-Dimethoxymaculine	Nta01g31980	-0.863793	0.000292428
Valyllysine	Nta01g31980	0.904229	5.39274e-05
Phe-Asn	Nta01g31980	0.892876	9.25835e-05
Ala Leu Leu	Nta01g31980	0.924151	1.73895e-05
(+)-argemonine	Nta01g31980	-0.821309	0.00105401
Plagiospirolide E	Nta01g31980	-0.809577	0.00141839
Ala Gly Leu	Nta01g31980	0.866131	0.000269284
Nordihydrocapsaicin	Nta01g31980	0.903779	5.51625e-05
Dimethoxane	Nta01g31980	-0.920201	2.22625e-05
His Glu Asn	Nta01g31980	-0.869089	0.000242074
Ser Ile Phe	Nta01g31980	0.893824	8.87043e-05
Cuspidiol	Nta01g31980	-0.87331	0.000207007
Cheiradone	Nta01g31980	-0.942618	4.44756e-06
(2R,3R)-3-Methylglutamyl-5-semialdehyde-N6-lysine	Nta01g31980	0.87186	0.000218575
tryptoquialanol	Nta01g31980	-0.832228	0.000784122
beta-Aflatrem	Nta01g31980	0.87734	0.000177355
Asp Val Leu	Nta01g31980	0.901837	6.07543e-05
Leu-Val-Ser	Nta01g31980	0.928043	1.34524e-05
Arg Leu	Nta01g31980	0.887694	0.000116197
LysoPE(20:4)	Nta01g31980	0.876265	0.000184917
Thr Leu Thr	Nta01g31980	0.92581	1.56133e-05
H-LEU-LEU-GLY-OH	Nta01g31980	0.916611	2.7571e-05
Thr-Trp	Nta01g31980	0.901069	6.30836e-05
Lactulose	Nta01g31980	-0.898424	7.16502e-05
Gabaculine	Nta01g31980	-0.862986	0.000300768
Histidylleucine	Nta01g31980	0.943959	3.9606e-06
11beta,13-dihydrolactucin 15-oxalate	Nta01g31980	0.679831	0.0150042
Gly Phe Val	Nta01g31980	0.818424	0.00113602
(R)-(Homo)3-citrate	Nta01g31980	-0.924534	1.69663e-05
L-Alanyl-L-proline	Nta01g31980	0.926854	1.45719e-05
Leu-Ala-Ser	Nta01g31980	0.889629	0.000106885
Ile Ile Asp	Nta01g31980	0.853589	0.000412184
Trp-Ala-Gly	Nta01g31980	0.871689	0.000219968
Asn Val Leu	Nta01g31980	0.883103	0.000140839
Pandangolide 1	Nta01g31980	0.835389	0.000717008
(-)-7-Hydroxylariciresinol 9'-p-coumarate	Nta01g31980	-0.870978	0.00022585
(+)-8-Acetoxycarvone	Nta01g31980	0.95677	1.10563e-06
3-Oxo-11,13(18)-oleandien-28-oic acid	Nta01g31980	-0.801563	0.00171812
gamma-Hydroxy-3-pyridinebutanoate	Nta01g31980	-0.914072	3.18934e-05
H-MET-MET-OH	Nta01g31980	-0.906228	4.86961e-05
Phe Gly	Nta01g31980	0.89293	9.23589e-05
3-Hydroxybibenzyl	Nta01g31980	-0.853741	0.000410157
Papuanone	Nta01g31980	0.950694	2.11204e-06
HQNO	Nta01g31980	0.536635	0.0720432
4'-Hydroxy-3,5,8,3'-tetramethoxy-7-prenyloxyflavone	Nta01g31980	-0.854322	0.000402483
PMEG	Nta01g31980	-0.797636	0.00188163
Cysteinylglycine	Nta01g31980	-0.788585	0.0023038
Arteannuin B	Nta01g31980	-0.883706	0.000137385
Brachystemidine B	Nta01g31980	-0.963416	4.85322e-07
(S)-Furanopetasitin	Nta01g31980	-0.965464	3.6511e-07
Tetrahydrocurcumin	Nta01g31980	-0.877556	0.000175871
Dictamnoside L	Nta01g31980	-0.914827	3.0555e-05
Asp Thr Leu	Nta01g31980	0.86771	0.000254472
Crispine A	Nta01g31980	0.721794	0.00804178
Chlorochrymorin	Nta01g31980	-0.930245	1.15602e-05
2-Oxoglutarate	Nta01g31980	-0.921282	2.08335e-05
Aminobutyl benzamide	Nta01g31980	0.732066	0.00679112
Glucovanillin	Nta01g31980	-0.86344	0.00029605
Leu Leu Gln	Nta01g31980	0.893442	9.02483e-05
Ghalakinoside	Nta01g31980	-0.878158	0.000171768
Alanylhydroxyproline	Nta01g31980	0.937996	6.50008e-06
Phe-arg	Nta01g31980	0.843098	0.00057189
Catalpol	Nta01g31980	-0.836684	0.00069083
Val Asp Leu	Nta01g31980	0.871549	0.000221118
Salbostatin	Nta01g31980	-0.918743	2.43118e-05
Cholestenone	Nta01g31980	-0.860678	0.00032565
3-Hydroxyhippuric acid	Nta01g31980	-0.93977	5.63916e-06
Dendromoniliside A	Nta01g31980	-0.897575	7.45881e-05
Evocalcet	Nta01g31980	0.951485	1.95073e-06
Lophanthoidin F	Nta01g31980	0.929541	1.21402e-05
Dictyoquinazol A	Nta01g31980	0.897402	7.51975e-05
Leu-Thr-Ser	Nta01g31980	0.851608	0.000439299
Thr Leu Ile	Nta01g31980	0.877897	0.000173538
N-Acetyl-glutamine	Nta01g31980	0.818041	0.00114725
Ser Ile Ala	Nta01g31980	0.895114	8.36295e-05
H-Leu-Asn-OH	Nta01g31980	0.88065	0.000155581
Acanthoglabrolide	Nta01g31980	-0.876955	0.000180038
Rehmannioside C	Nta01g31980	-0.839365	0.000638986
Anthosterone B	Nta01g31980	-0.886452	0.0001225
Ala-Leu-Leu-Asp	Nta01g31980	0.83948	0.000636827
Ancistrogriffithine A	Nta01g31980	-0.96486	3.97794e-07
Ingenol Mebutate	Nta01g31980	0.921966	1.99678e-05
PYRAOXYSTROBIN	Nta01g31980	-0.8508	0.000450739
Tryptophyl-Isoleucine	Nta01g31980	0.86363	0.000294104
Pro Ile Ala	Nta01g31980	0.920708	2.15834e-05
Ile Glu Leu	Nta01g31980	0.942389	4.53544e-06
Triptofordin D 1	Nta01g31980	-0.931722	1.04134e-05
Ala Leu Glu	Nta01g31980	0.884516	0.000132858
p-Menth-1-ene-3,4-diol 4-O-beta-glucopyranoside	Nta01g31980	0.902595	5.85217e-05
Obliquine	Nta01g31980	0.945686	3.39698e-06
Tiruchanduramine	Nta01g31980	-0.850097	0.000460886
Genipin	Nta01g31980	-0.878082	0.000172279
6beta-Hydroxyhuperzine A	Nta01g31980	-0.889984	0.000105242
Atractyloside A	Nta01g31980	-0.809356	0.00142609
Ser Leu Ile	Nta01g31980	0.869581	0.000237763
Formylfusarochromanone	Nta01g31980	-0.91521	2.98939e-05
Astellolide B	Nta01g31980	-0.880248	0.00015811
zinolol	Nta01g31980	-0.855536	0.000386816
Tyr Leu	Nta01g31980	0.836821	0.000688099
Verbenalin	Nta01g31980	-0.946172	3.25046e-06
Ixoside	Nta01g31980	-0.947216	2.95245e-06
Phe-Ala-Gly	Nta01g31980	0.910424	3.90163e-05
DL-Leucyl-DL-phenylalanine	Nta01g31980	0.874523	0.000197706
Ile Ile	Nta01g31980	0.876537	0.000182979
Glidobactin D	Nta01g31980	-0.894282	8.6875e-05
Val Ile Leu	Nta01g31980	0.900654	6.4372e-05
Met Leu	Nta01g31980	0.80215	0.00169464
Phe-Ala-Asp	Nta01g31980	0.837822	0.000668439
Terragine E	Nta01g31980	0.87925	0.000164522
Picfeltarraenin IB	Nta01g31980	0.718473	0.0084808
Succinylaminoimidazole carboxamide riboside	Nta01g31980	-0.91643	2.78631e-05
Isothalicrine	Nta01g31980	0.869553	0.000238001
Ascochalasin	Nta01g31980	-0.838252	0.000660138
Thr Glu	Nta01g31980	0.963246	4.96594e-07
Asp-Trp	Nta01g31980	0.656605	0.020375
Garajonone	Nta01g31980	-0.83014	0.000831052
Eriotriochin	Nta01g31980	-0.810236	0.00139566
Ala-Leu-Val-Ser	Nta01g31980	0.834912	0.000726842
Nitropyrrolin D	Nta01g31980	0.56924	0.0533862
D-Phe-Pro-Arg-CH2Cl	Nta01g31980	0.836003	0.000704501
Circinamide	Nta01g31980	0.897796	7.38149e-05
Spinanine A	Nta01g31980	-0.789595	0.00225337
1,3-Dihydroxy-1-(4-hydroxy-3,5-dimethoxyphenyl)propan-2-one	Nta01g31980	-0.809752	0.00141234
H-Val-Tyr-OH	Nta01g31980	0.825254	0.000949347
1-Methyl-2-hydroadenosine	Nta01g31980	0.895184	8.33614e-05
3-(4-hydroxy-3-methoxyphenyl)propanoate	Nta01g31980	-0.946026	3.29389e-06
Glu-Ile-Val	Nta01g31980	0.90288	5.76999e-05
Asn-Tyr	Nta01g31980	0.921316	2.07901e-05
TXB1	Nta01g31980	-0.848032	0.000491729
Consabatine	Nta01g31980	0.827029	0.000904955
3-Hydroxy-prazepam	Nta01g31980	-0.890712	0.000101933
Ile Phe Asp	Nta01g31980	0.877568	0.000175788
Lys Val Leu	Nta01g31980	0.890698	0.000101995
Repandin D	Nta01g31980	-0.81882	0.00112446
3-Methyldioxyindole	Nta01g31980	-0.92037	2.20345e-05
6-O-Veratroylcatalpol	Nta01g31980	0.842032	0.000590455
(+)-7alpha,8alpha-Epoxyblumenol B	Nta01g31980	0.969352	2.02261e-07
Euperfolitin	Nta01g31980	-0.830001	0.000834251
Phenylalanyltryptophan	Nta01g31980	0.887145	0.00011895
Syringopicroside	Nta01g31980	-0.887408	0.000117626
Lysylserine	Nta01g31980	0.892582	9.38097e-05
Leu-Thr-Ala	Nta01g31980	0.907086	4.65779e-05
Oxostephamiersine	Nta01g31980	-0.754102	0.004605
Esculin	Nta01g31980	-0.854769	0.000396667
Etravirine	Nta01g31980	0.912863	3.41287e-05
Madecassoside	Nta01g31980	-0.85051	0.000454901
Aucubin	Nta01g31980	-0.924485	1.70204e-05
Cenocladamide	Nta01g31980	-0.913409	3.3104e-05
L-Leucyl-L-alanine	Nta01g31980	0.846538	0.000515003
Eletriptan	Nta01g31980	-0.907219	4.62565e-05
Stachyline D	Nta01g31980	0.834428	0.000736919
Corchoionoside C	Nta01g31980	-0.894679	8.53159e-05
Val Arg	Nta01g31980	0.937375	6.82503e-06
Glu-Asp-Ile	Nta01g31980	0.877091	0.000179086
Salvadione C	Nta01g31980	0.896932	7.68707e-05
Diprotin A	Nta01g31980	0.88355	0.000138274
Javanicoside B	Nta01g31980	-0.858159	0.00035459
Gardenoside	Nta01g31980	-0.880556	0.000156172
Isostephodeline	Nta01g31980	-0.831142	0.000808274
Ile Pro Val	Nta01g31980	0.866327	0.000267409
Kahakamide A	Nta01g31980	-0.861971	0.000311519
Toddaliopsin A	Nta01g31980	-0.914453	3.12121e-05
Aminophenazone	Nta01g31980	0.8425	0.000582257
His Phe	Nta01g31980	0.923256	1.84114e-05
Cardiospermin	Nta01g31980	-0.897328	7.5458e-05
Allopurinol riboside	Nta01g31980	-0.810763	0.00137772
H-Ser-Leu-OH	Nta01g31980	0.865724	0.000273206
Stilbostemin H 3'-beta-D-glucopyranoside	Nta01g31980	-0.937393	6.81575e-06
(+)-Galwesine	Nta01g31980	0.881659	0.000149375
1beta-(3-Hydroxy-4,5-dimethoxyphenyl)-O-glucopyranoside	Nta01g31980	-0.900819	6.38573e-05
Bistratamide B	Nta01g31980	-0.903713	5.53453e-05
Cedryl acetate	Nta01g31980	0.850637	0.000453075
Litsenolide C1	Nta01g31980	0.941625	4.83801e-06
Myrothenone A	Nta01g31980	-0.924349	1.71697e-05
Trichodepsipeptide A	Nta01g31980	-0.903673	5.54578e-05
Melampodinin B	Nta01g31980	0.936088	7.53928e-06
Ser Ile Ser	Nta01g31980	0.819369	0.00110861
Barlerin	Nta01g31980	-0.847421	0.000501146
Glu Glu Ile	Nta01g31980	0.905702	5.00319e-05
(-)-Taylorione	Nta01g31980	-0.867674	0.000254806
S-Adenosyl-L-methionine	Nta01g31980	0.753577	0.00464988
Chaetoquadrin E	Nta01g31980	0.772158	0.00325065
Methyl gallate 3-O-beta-D-glucopyranoside	Nta01g31980	-0.915671	2.9114e-05
7-Oxostaurosporine	Nta01g31980	-0.940521	5.30323e-06
Isoleucine	Nta01g31980	0.845601	0.000530046
Phenylalanylalanine	Nta01g31980	0.864332	0.000286957
Arg Val Leu	Nta01g31980	0.844086	0.000555069
alcaligin	Nta01g31980	0.857941	0.000357184
Methyl syringate	Nta01g31980	0.825512	0.000942781
Tuliposide A	Nta01g31980	-0.828282	0.000874602
Latrunculin B	Nta01g31980	-0.919899	2.26758e-05
13(S)-HODE	Nta01g31980	0.876593	0.000182587
Leu-Asp-Ser	Nta01g31980	0.832702	0.00077375
Isochondrodendrine	Nta01g31980	0.807865	0.00147877
4-Methylantirrhinoside	Nta01g31980	-0.879861	0.000160571
Guineamide D	Nta01g31980	-0.893285	9.08921e-05
Anagliptin	Nta01g31980	0.579843	0.0481308
H-PHE-LEU-OH	Nta01g31980	0.77367	0.0031529
Stellatoside B	Nta01g31980	-0.838371	0.000657838
Leu Ala Lys	Nta01g31980	0.866965	0.00026138
Pipacycline	Nta01g31980	-0.708002	0.00998253
ent-15-Kaurene-17,19-dioic acid	Nta01g31980	0.909328	4.13834e-05
Lappaol D	Nta01g31980	-0.886796	0.000120727
Rossicasin A	Nta01g31980	-0.713951	0.00910695
Pro Arg Leu	Nta01g31980	0.785021	0.00248853
cis-(Homo)3-aconitate	Nta01g31980	-0.827751	0.000887359
Chabrolol B	Nta01g31980	0.918685	2.4396e-05
PA(22:5(7Z,10Z,13Z,16Z,19Z)/15:0)	Nta01g31980	0.925227	1.62209e-05
(+)-Quebrachidine	Nta01g31980	0.716907	0.00869391
Irisoquin	Nta01g31980	0.857733	0.000359673
Dehydrooreadone	Nta01g31980	-0.869775	0.00023608
Valtrate hydrine B3	Nta01g31980	-0.788564	0.00230483
Paulownioside	Nta01g31980	-0.922473	1.9344e-05
6-O-(4-Hydroxybenzoyl)-ajugol	Nta01g31980	0.8405	0.000617967
Pharboside G	Nta01g31980	0.840217	0.000623162
Clindamycin	Nta01g31980	0.843508	0.000564864
5'-Methylthioadenosine	Nta01g31980	0.901646	6.13279e-05
Indole-3-acetaldoxime	Nta01g31980	-0.93901	5.99642e-06
(R)-2-Hydroxy-7,8-dimethoxy-2H-1,4-benzoxazin-3(4H)-one 2-glucoside	Nta01g31980	-0.921592	2.04384e-05
(R)-8-Methylsulfinyloctyl isothiocyanate	Nta01g31980	-0.84273	0.000578241
Spongianolide E	Nta01g31980	-0.85882	0.000346814
Glu-Ile-Ser	Nta01g31980	0.864004	0.000290284
Irisoid E	Nta01g31980	0.767272	0.00358239
Lysylglutamic acid	Nta01g31980	0.873911	0.000202359
Benzoylagmatine	Nta01g31980	-0.942802	4.37811e-06
Leuhistin	Nta01g31980	0.896011	8.0242e-05
1-Benzylpiperazine	Nta01g31980	-0.846812	0.000510678
L-Xylulose	Nta01g31980	-0.934537	8.47701e-06
DG(18:4(6Z,9Z,12Z,15Z)/15:0/0:0)	Nta01g31980	0.945084	3.58562e-06
Dahuribirin F	Nta01g31980	-0.863368	0.000296801
(-)-Chrysogine	Nta01g31980	-0.775451	0.00304063
Nanjiol B	Nta01g31980	-0.955083	1.3351e-06
beta-fenchocamphorone	Nta01g31980	-0.908369	4.35475e-05
Garenoxacin	Nta01g31980	-0.872908	0.000210163
Curcumol	Nta01g31980	-0.865716	0.000273279
Hyperoside	Nta01g31980	0.826347	0.000921831
pre-putrebactin	Nta01g31980	0.865184	0.000278477
7-Methoxy-1,2,3,4-tetrahydroacridin-9-amine	Nta01g31980	0.900409	6.51439e-05
Cryptophorine	Nta01g31980	-0.722319	0.00797397
Stachysoside A	Nta01g31980	-0.85305	0.000419433
DG(PGD2/0:0/i-18:0)	Nta01g31980	0.886522	0.000122138
H-MET-TRP-OH	Nta01g31980	0.87178	0.000219228
Mallotophenone	Nta01g31980	-0.940514	5.30589e-06
H-LEU-LEU-ALA-OH	Nta01g31980	0.848306	0.00048754
Ramiprilat	Nta01g31980	0.778569	0.00285143
1-Hydroxycarvedilol	Nta01g31980	0.691041	0.0128237
N-Benzyloxycarbonylglycine	Nta01g31980	-0.872328	0.000214787
7-Hydroxy-3,5,8-trimethoxy-3',4'-methylenedioxyflavone	Nta01g31980	-0.850112	0.000460669
N6-Methyladenosine	Nta01g31980	0.858447	0.000351179
Aspartylphenylalanine	Nta01g31980	0.799281	0.00181174
Pro Ile	Nta01g31980	-0.880232	0.000158209
4-Isopropyl-2-methylphenol	Nta01g31980	-0.905589	5.03246e-05
ciguatoxin IJKLM cyclic acetal	Nta01g31980	-0.919738	2.28985e-05
Arg Leu Ile	Nta01g31980	0.870147	0.000232876
Maryal	Nta01g31980	-0.867455	0.000256823
7-O-[alpha-L-rhamnosyl-(1->2)-beta-D-glucosyl]isovitexin	Nta01g31980	-0.879445	0.00016325
Ser Phe	Nta01g31980	0.805328	0.00157181
Scutebarbatine J	Nta01g31980	-0.824528	0.000967985
H-Ile-Tyr-OH	Nta01g31980	0.884679	0.00013196
Cucurbitacin I	Nta01g31980	-0.861944	0.000311811
7alpha-Hydroxyeurycomalactone	Nta01g31980	0.937357	6.83468e-06
Epimedoicarisoside A	Nta01g31980	-0.898676	7.07989e-05
Perphenazine	Nta01g31980	-0.920024	2.25037e-05
Chaetoglobosin N	Nta01g31980	-0.845994	0.000523701
Armillane	Nta01g31980	-0.87088	0.000226666
(3R,5R)-3-(((3R,5R)-3,5-dihydroxy decanoyl)oxy)-5-hydroxydecanoic acid	Nta01g31980	-0.93494	8.22479e-06
H-Phe-Val-OH	Nta01g31980	0.855812	0.000383322
Sulfocholic acid	Nta01g31980	0.884982	0.000130305
Tetranor-12R-HETE	Nta01g31980	0.927425	1.40255e-05
9-(alpha-D-glucosyl)dihydrozeatin	Nta01g31980	0.895051	8.38742e-05
5beta-Dihydrocortisol	Nta01g31980	0.786677	0.00240131
3-Mercaptolactate	Nta01g31980	-0.865793	0.000272542
13-Hydroxycapsidiol	Nta01g31980	-0.824773	0.000961647
Ile Ile Ser	Nta01g31980	0.845455	0.00053242
Clotrimazole	Nta01g31980	-0.836028	0.000703998
Globulusin B	Nta01g31980	-0.773293	0.00317708
11-Meo-fes	Nta01g31980	0.895378	8.26206e-05
6-Oxabicyclo[3.1.0]hexane-2-undecanoic acid methyl ester	Nta01g31980	0.808757	0.00144708
Ptaquiloside	Nta01g31980	-0.795812	0.00196149
Kanzonol S	Nta01g31980	-0.937532	6.74191e-06
CADALENE	Nta01g31980	-0.818898	0.0011222
Cyclo(phenylalanyl-prolyl)	Nta01g31980	-0.883042	0.000141193
Trp Phe Glu	Nta01g31980	-0.961091	6.57836e-07
Val Val Ile	Nta01g31980	0.849369	0.000471581
Trimethobenzamide	Nta01g31980	0.894713	8.51812e-05
Leu Ile Thr	Nta01g31980	0.795976	0.00195421
Cyanofenphos	Nta01g31980	0.754077	0.00460712
Kadsuphilol G	Nta01g31980	-0.938538	6.22673e-06
S-Methyl-methionine	Nta01g31980	0.504507	0.0943871
Glycyl-L-leucine	Nta01g31980	0.737439	0.00619834
Leu-Leu-Asp	Nta01g31980	0.799234	0.00181371
2-thio-PAF	Nta01g31980	-0.915836	2.88384e-05
N-Benzylformamide	Nta01g31980	-0.914641	3.08814e-05
Alisol C 23-acetate	Nta01g31980	-0.77488	0.00307627
Virenamide A	Nta01g31980	-0.861525	0.000316336
Dihydrofusarubin	Nta01g31980	0.819105	0.00111622
Methyl-4-O-methylgallate	Nta01g31980	-0.883382	0.000139232
Procaine	Nta01g31980	0.749736	0.00498845
Quercimeritrin	Nta01g31980	0.770601	0.0033537
4-Carboxy-4-hydroxy-2-oxoadipate	Nta01g31980	-0.844637	0.000545868
21-Fluoro-16-ethyl-19-norprogesterone	Nta01g31980	0.891664	9.77318e-05
3-Ethyltoluene	Nta01g31980	-0.92575	1.56751e-05
Cichorioside N	Nta01g31980	-0.920214	2.22453e-05
H-PHE-PHE-OH	Nta01g31980	0.775269	0.00305197
Monensin B	Nta01g31980	-0.835981	0.00070494
Pyroglutamyl-Isoleucine	Nta01g31980	0.805531	0.0015642
Morin	Nta01g31980	0.758335	0.00425498
GroPIns	Nta01g31980	0.675935	0.0158222
Yunngnin A	Nta01g31980	-0.905049	5.17302e-05
Medicagenic acid 3-O-triglucoside	Nta01g31980	-0.829523	0.000845316
5-epi-Valiolol 7-phosphate	Nta01g31980	-0.903521	5.58815e-05
Lactose 6-phosphate	Nta01g31980	-0.910527	3.87988e-05
Scutianine J	Nta01g31980	-0.779238	0.00281202
4Z,7Z,10Z,13Z-hexadecatetraenoic acid	Nta01g31980	0.868338	0.000248768
Pseudostellarin B	Nta01g31980	-0.798671	0.00183744
cotinine-glucuronide	Nta01g31980	-0.906717	4.74814e-05
H-Val-Met-OH	Nta01g31980	0.74773	0.00517238
L-Alanyl-L-leucine	Nta01g31980	0.843313	0.000568195
Arg Asp Met	Nta01g31980	-0.815689	0.00121819
Gossypol	Nta01g31980	-0.877318	0.000177512
DG(i-16:0/0:0/PGD2)	Nta01g31980	0.841783	0.000594859
Theogallin	Nta01g31980	-0.851322	0.000443318
Debromohymenialdisine	Nta01g31980	0.767946	0.00353514
2-keto palmitic acid	Nta01g31980	0.775655	0.00302799
Striatisporin A	Nta01g31980	0.856765	0.000371443
Bungeiside B	Nta01g31980	-0.892034	9.61365e-05
Asp-Leu-Val-Ser	Nta01g31980	0.915892	2.87448e-05
alpha-Ionol O-[arabinosyl-(1->6)-glucoside]	Nta01g31980	0.79471	0.002011
Voriconazole	Nta01g31980	-0.95323	1.62902e-06
Cimiracemoside D	Nta01g31980	0.915772	2.89444e-05
Garcinolic Acid	Nta01g31980	-0.939249	5.88224e-06
Cryptotanshinone	Nta01g31980	0.796044	0.00195119
Semilepidinoside B	Nta01g31980	-0.942799	4.37922e-06
3,3-Bis(4-hydroxyphenyl)pentane	Nta01g31980	0.500942	0.097123
Dianthoside	Nta01g31980	-0.836948	0.000685575
LOLIOLIDE	Nta01g31980	-0.865225	0.000278076
Melissoidesin D	Nta01g31980	-0.916114	2.83783e-05
8-MeSO-octyl-CN	Nta01g31980	0.820503	0.00107644
Cachineside I	Nta01g31980	-0.831291	0.00080491
Kinetensin 1-3	Nta01g31980	0.825244	0.000949587
Jerantinine H	Nta01g31980	0.710308	0.00963607
Cytisoside	Nta01g31980	-0.726758	0.00741755
7-Deazaadenosine	Nta01g31980	-0.757403	0.00433022
N6-Threonylcarbamoyladenosine	Nta01g31980	-0.921716	2.02814e-05
Nigellimine N-oxide	Nta01g31980	0.685438	0.0138819
Gamma-Glu-Leu	Nta01g31980	0.87647	0.000183457
Isomorellinol	Nta01g31980	0.843283	0.000568701
Glycylprolylhydroxyproline	Nta01g31980	0.865498	0.000275406
Scabiolide	Nta01g31980	0.737325	0.00621045
Isoscopoletin	Nta01g31980	-0.936726	7.17833e-06
Phe Trp Ser	Nta01g31980	-0.875488	0.000190539
N-(2-Carboxyphenyl)retinamide	Nta01g31980	0.876442	0.000183656
12-O-Benzoylisolineolon	Nta01g31980	-0.84464	0.000545813
Trifochalcanoloside I	Nta01g31980	0.898009	7.30745e-05
Wahlenoside A	Nta01g31980	-0.576131	0.0499273
(+)-Oxyglutinosone	Nta01g31980	-0.827458	0.000894488
Erythro-carolignan E	Nta01g31980	-0.86511	0.000279211
4-Methylumbelliferyl beta-D-glucuronide	Nta01g31980	-0.874002	0.00020166
carbidopa	Nta01g31980	-0.7969	0.00191356
H-Thr-Phe-OH	Nta01g31980	0.751536	0.00482754
FA 18:2+1O	Nta01g31980	0.966116	3.3231e-07
rel-Cyclo-(Pro-Pro-Ala-Gly-Leu-Ala-Thr-Phe)	Nta01g31980	-0.934175	8.7086e-06
Podorhizol beta-D-glucoside	Nta01g31980	-0.762571	0.00392526
Thr Leu	Nta01g31980	0.798628	0.00183923
Vicibactin-7101	Nta01g31980	-0.921632	2.03873e-05
1-Methylguanosine	Nta01g31980	0.931483	1.05926e-05
Neuromedin B (1-3)	Nta01g31980	0.778726	0.00284215
Picrocrocin	Nta01g31980	-0.840482	0.000618305
(6R,9S)-3-Oxo-alpha-ionol beta-D-glucoside	Nta01g31980	-0.912785	3.42769e-05
anthraniloyl-O-glucose	Nta01g31980	-0.875608	0.000189665
Pyrogallol-2-O-glucuronide	Nta01g31980	0.708097	0.00996814
Tricetin	Nta01g31980	0.716766	0.0087132
Rhyncoside A	Nta01g31980	-0.85226	0.000430224
2-(3,4,5-Trimethoxyphenyl)-5,6,7,8-tetramethoxy-4H-1-benzopyran-4-one	Nta01g31980	0.899275	6.88012e-05
Dihydrotricetin 7,3'-dimethyl ether	Nta01g31980	-0.522939	0.0810686
Linaride	Nta01g31980	-0.782017	0.00265282
Corymbiferan lactone A	Nta01g31980	-0.812518	0.00131915
2-Thiophenecarboxaldehyde	Nta01g31980	-0.832927	0.000768877
Cephaeline	Nta01g31980	0.713644	0.00915067
Thymoquinol 2-O-beta-glucopyranoside	Nta01g31980	-0.798014	0.00186539
4-Isopropyl-2,4,6-cycloheptatrien-1-one	Nta01g31980	-0.929968	1.1786e-05
Kunzeaphlogin A	Nta01g31980	-0.891362	9.90515e-05
3-[(3-Methylbutyl)nitrosoamino]-2-butanone	Nta01g31980	0.880545	0.000156236
Norsanguinine	Nta01g31980	-0.894376	8.65031e-05
N-Acetyl-leucyl-leucine	Nta01g31980	0.80479	0.0015921
2-Thiouridine	Nta01g31980	-0.549232	0.0643749
Palythoalone A	Nta01g31980	-0.930028	1.17365e-05
Padmatin 5-glucoside	Nta01g31980	0.810595	0.00138341
12-Oxocurvularin	Nta01g31980	-0.88546	0.000127727
Vardenafil	Nta01g31980	-0.886349	0.000123035
1-O-Cinnamoyl-beta-D-gentiobiose	Nta01g31980	-0.941157	5.03093e-06
Sodwanone L	Nta01g31980	0.936823	7.12435e-06
Dibenzo[h,rst]pentaphene	Nta01g31980	-0.851148	0.000445782
Pro Glu Ile	Nta01g31980	0.845489	0.000531873
Lys Leu	Nta01g31980	0.734153	0.00655603
Matairesinol	Nta01g31980	-0.873107	0.000208599
Tormentic acid	Nta01g31980	-0.810053	0.00140194
Estriol 3-sulfate	Nta01g31980	-0.855863	0.000382688
Lys Leu Asp	Nta01g31980	0.662192	0.0189718
Ajubractin D	Nta01g31980	0.764271	0.00379851
fagopyritol A2	Nta01g31980	-0.90157	6.15562e-05
Sphenalactone B	Nta01g31980	-0.922928	1.87978e-05
Eriojaposide A	Nta01g31980	-0.873578	0.000204923
2-Carboxybenzaldehyde	Nta01g31980	-0.832987	0.00076757
H-PHE-ASP-OH	Nta01g31980	0.849433	0.00047064
Dolichol phosphate	Nta01g31980	0.834413	0.000737221
Sesbanimide A	Nta01g31980	-0.915393	2.95833e-05
Thielavin E	Nta01g31980	-0.87348	0.00020568
Guanosine-3',5'-cyclic monophosphate	Nta01g31980	0.841415	0.000601421
2-Amino-4-(2-aminophenyl)-4-oxobutanoic acid	Nta01g31980	-0.847512	0.000499729
2-Methyl-trans-aconitate	Nta01g31980	-0.655704	0.0206081
Hexadecanedioic acid	Nta01g31980	0.734634	0.00650274
Bactobolin	Nta01g31980	-0.829373	0.000848816
Secobarbital	Nta01g31980	-0.38863	0.21185
Tinosposinenside B	Nta01g31980	0.881832	0.000148331
Asparaginyl-Valine	Nta01g31980	0.828857	0.000860946
Pro Phe Asn	Nta01g31980	0.697488	0.0116814
CLONIXIN	Nta01g31980	-0.930681	1.12114e-05
Dodecafluoropentane	Nta01g31980	0.780917	0.002715
5-(4-Acetoxybut-1-ynyl)-2,2'-bithiophene	Nta01g31980	-0.906906	4.70163e-05
PA(18:1(11Z)/19:0)	Nta01g31980	-0.828459	0.000870377
Piclamilast	Nta01g31980	-0.846815	0.000510622
Leu Ile Asn	Nta01g31980	0.797881	0.0018711
3-(prop-2-enoate)-o-benzoquinone	Nta01g31980	-0.856697	0.000372293
(+)-Jasplakinolide Z1	Nta01g31980	-0.88539	0.0001281
Pentandroside C	Nta01g31980	0.815039	0.00123839
PHENOLPHTHALEIN	Nta01g31980	-0.810331	0.00139241
Lancerin	Nta01g31980	-0.832128	0.000786328
N-Phenylacetylaspartic acid	Nta01g31980	-0.803095	0.00165737
PA(18:2(9Z,11E)+=O(13)/a-25:0)	Nta01g31980	-0.814041	0.00126989
Palau'imide	Nta01g31980	0.844161	0.00055382
Dendronesterol B	Nta01g31980	-0.94162	4.83995e-06
Androstan-3alpha,17beta-diol	Nta01g31980	-0.857716	0.000359884
L-Aspartic acid	Nta01g31980	0.768413	0.00350273
2-Hydroxy-3-(beta-D-xylopyranosyloxy)benzoic acid	Nta01g31980	-0.727019	0.00738585
Fraxetin	Nta01g31980	-0.803273	0.00165045
Deacetylasperulosidic Acid	Nta01g31980	-0.861047	0.000321561
Methyl 2-(4-isopropyl-4-methyl-5-oxo-2-imidazolin-2-yl)-p-toluate	Nta01g31980	-0.922583	1.92116e-05
FMN	Nta01g31980	0.890254	0.000104007
Desfesoterodine	Nta01g31980	0.872912	0.000210132
Devazepide	Nta01g31980	-0.83008	0.000832429
Cannabisin C	Nta01g31980	0.828549	0.000868245
(+)-Rishirilide B	Nta01g31980	0.875877	0.000187712
Fungichromin	Nta01g31980	-0.900986	6.33422e-05
Ile Thr Phe	Nta01g31980	0.725203	0.00760909
4-Guanidinobutanal	Nta01g31980	0.562559	0.0568969
PA(20:4(8Z,11Z,14Z,17Z)/20:3(6,8,11)-OH(5))	Nta01g31980	0.727958	0.00727233
Speradine G	Nta01g31980	-0.772961	0.00319847
8-Hydroxyluteolin 8-gentiobioside	Nta01g31980	0.586476	0.0450346
4-(Dimethylamino)butyl carbamimidothioate	Nta01g31980	0.570659	0.0526609
Topsentisterol B1	Nta01g31980	-0.869803	0.000235835
Nocardamine	Nta01g31980	-0.800757	0.00175074
Maculosin	Nta01g31980	-0.91	3.99199e-05
Fluocinonide	Nta01g31980	-0.765696	0.0036947
Gln Leu Leu	Nta01g31980	0.845468	0.000532208
Sachaloside VII	Nta01g31980	-0.703486	0.0106879
Chlorphenoxamine	Nta01g31980	-0.89908	6.94459e-05
Tyr Gln Phe	Nta01g31980	-0.848755	0.000480749
Euphodendrophane E	Nta01g31980	-0.92424	1.72905e-05
Strictoloside	Nta01g31980	-0.85279	0.000422961
Rubescensin M	Nta01g31980	-0.718174	0.00852107
9-(2,3-dihydroxypropoxy)-9-oxononanoic acid	Nta01g31980	-0.833315	0.000760514
4-(beta-D-glucosyloxy)-3-hydroxy-benzoic acid	Nta01g31980	-0.837572	0.000673301
Virescenoside R	Nta01g31980	0.783666	0.00256161
Leu-Val-Gly	Nta01g31980	0.802883	0.00166568
12S-HHTrE	Nta01g31980	0.709443	0.00976502
[truncated: 248,002+ more rows]

## Sheet:  Supplementary Table 4
Supplementary Table 4 Correlation Analysis Between Transcriptomes and Metabolomes of YY_B vs YY_Z
metabolite	Gene	corr	pvalue
Didanosine	Nta04g13300	0.961151	0.00223456
Makaluvamine A	Nta04g13300	-0.862061	0.0272285
Sedumoside H	Nta04g13300	0.853985	0.030424
6-(2-carboxy-6-hydroxyphenoxy)-3,4,5-trihydroxyoxane-2-carboxylic acid	Nta04g13300	0.989626	0.000160859
PS(14:0(3-OH)/14:0(3-OH))	Nta04g13300	-0.774991	0.0702478
	Nta04g13300	-0.883265	0.0196453
Kahakamide A	Nta04g13300	0.933583	0.00647028
Phomamide	Nta04g13300	0.833893	0.039096
Norgestimate	Nta04g13300	0.858011	0.0288099
2,4,6-Trimethyl-1,3,5-trithiane	Nta04g13300	0.835673	0.0382864
Glaucarubin	Nta04g13300	0.806466	0.0525588
TERNSTROSIDE C	Nta04g13300	-0.818375	0.0464858
2-O-Caffeoylglucarate	Nta04g13300	-0.886723	0.0185206
Lariciresinol acetate	Nta04g13300	-0.901431	0.014095
2-Hydroxy-3-(beta-D-xylopyranosyloxy)benzoic acid	Nta04g13300	0.928451	0.00749582
Convallatoxin	Nta04g13300	0.881538	0.0202186
Xylomollin	Nta04g13300	0.929351	0.00731053
PA(20:4(5Z,8Z,11Z,14Z)/22:6(4Z,7Z,10Z,13E,15E,19Z)-OH(17))	Nta04g13300	-0.78376	0.0650842
Leucylproline	Nta04g13300	0.872529	0.0233375
Lamiide	Nta04g13300	-0.812556	0.0494099
beta-D-Galactosyl-(1->4)-L-rhamnose	Nta04g13300	0.743616	0.0901724
Crosatoside B	Nta04g13300	0.869419	0.0244637
Kanokoside C	Nta04g13300	0.897175	0.0153158
Nimbolide	Nta04g13300	0.853692	0.0305429
Dauricoside	Nta04g13300	0.837524	0.0374533
Epidermin	Nta04g13300	0.860717	0.0277487
(+)-Ixerin H	Nta04g13300	0.974926	0.0009352
Jujubasaponin VI	Nta04g13300	-0.85263	0.0309764
mannosylglucosylglyceric acid	Nta04g13300	0.962521	0.00208071
(+)-Ambruticin	Nta04g13300	-0.809928	0.0507577
5-Ethyl-3,4-dimethyl-2-furanundecanoic acid	Nta04g13300	0.90882	0.0120917
(3S,4S)-3-Hydroxytetradecane-1,3,4-tricarboxylate	Nta04g13300	0.745327	0.0890286
Botcinic acid	Nta04g13300	0.907033	0.0125626
Kukoamine A	Nta04g13300	0.787639	0.0628573
N1-(2,4-Dimethoxybenzyl)-n2-(2-(pyridin-2-yl) ethyl)oxalamide	Nta04g13300	0.893471	0.0164183
5alpha-Androstane-3beta,7alpha,17beta-triol	Nta04g13300	0.872845	0.0232248
Paeoniflorin	Nta04g13300	-0.855524	0.0298022
Leu-Thr-Ser	Nta04g13300	-0.941551	0.00502465
Bilobalide	Nta04g13300	-0.869834	0.024312
(-)-Simulanol	Nta04g13300	0.935372	0.00613026
FUMIQUINAZOLINE A	Nta04g13300	0.554968	0.25301
Coelovirin C	Nta04g13300	0.801196	0.0553556
Calleryanin	Nta04g13300	0.908929	0.0120632
Isoamoritin	Nta04g13300	-0.853889	0.0304632
PGP(10:0/18:0)	Nta04g13300	-0.915014	0.0105269
3,5,6,7,2',3',4'-Heptahydroxyflavone	Nta04g13300	0.807303	0.0521204
Rossicasin A	Nta04g13300	0.877162	0.0217071
Arzoxifene	Nta04g13300	0.803984	0.0538675
Ser Glu Glu	Nta04g13300	0.871508	0.0237045
longirostrerone B	Nta04g13300	-0.927994	0.00759063
PGP(12:0/14:0)	Nta04g13300	-0.842305	0.0353408
Pannellin	Nta04g13300	0.617333	0.191633
Paraibanol	Nta04g13300	0.878059	0.0213977
4-Methylgallic acid 3-glucuronide	Nta04g13300	0.848697	0.0326069
2-trans-O-Feruloylglucaric acid	Nta04g13300	0.945227	0.00441794
Forskoditerpenoside A	Nta04g13300	0.548624	0.259629
Loperamide	Nta04g13300	0.945435	0.00438482
7-hydroxy-L-tryptophan	Nta04g13300	0.894022	0.0162519
Pyrimethamine	Nta04g13300	0.902426	0.0138165
Saundersioside D	Nta04g13300	-0.757261	0.0812323
Saframycin R	Nta04g13300	-0.769123	0.0738032
7-Hydroxy-4H-chromen-4-one	Nta04g13300	0.926036	0.00800366
Ginkgolide J	Nta04g13300	0.98145	0.000512956
Lauryl sulfate	Nta04g13300	0.973795	0.00102108
Riboflavin	Nta04g13300	-0.789025	0.0620702
(+)-Hydroxypinoresinol 4,4'-di-O-beta-D-glucopyranoside	Nta04g13300	-0.803024	0.054378
Speradine G	Nta04g13300	0.76278	0.0777355
Asiaticoside B	Nta04g13300	0.757093	0.0813396
2,4-Divinylprotochlorophyllide	Nta04g13300	0.917511	0.00992602
Cistanoside F	Nta04g13300	-0.771442	0.0723883
His-Trp	Nta04g13300	0.844735	0.0342895
4-Hydroxyphenylacetylglutamic acid	Nta04g13300	-0.866006	0.0257287
Fraxinellone	Nta04g13300	-0.869407	0.0244682
Tamynine	Nta04g13300	0.78262	0.065745
Licofelone	Nta04g13300	0.837277	0.0375639
Canrenone	Nta04g13300	-0.779156	0.0677725
Tenuiphenone B	Nta04g13300	0.618619	0.190441
PILOCARPINE	Nta04g13300	0.776799	0.0691685
Pyroglutamyl-3-methylhistidyl-prolinamide	Nta04g13300	-0.746086	0.0885229
Ajubractin D	Nta04g13300	-0.976348	0.000832513
Hesperetin	Nta04g13300	-0.922339	0.00881255
N-acetyl tyramine	Nta04g13300	0.849205	0.0323942
Dide-O-methylsimmondsin	Nta04g13300	0.774098	0.0707834
Globulusin A	Nta04g13300	0.812417	0.0494807
L-isoleucyl-L-proline	Nta04g13300	0.858568	0.02859
Artoindonesianin P	Nta04g13300	0.860554	0.0278118
Trungapeptin A	Nta04g13300	-0.743781	0.0900619
Perseanol	Nta04g13300	0.909254	0.0119786
Pyranomammea B	Nta04g13300	0.95997	0.00237155
Amritoside A	Nta04g13300	0.971661	0.00119324
N-trans-Feruloyltyramine	Nta04g13300	0.941269	0.00507271
Sachalinoside A	Nta04g13300	0.683446	0.13445
Cyclo(4-hydroxy-R-Pro-S-Leu)	Nta04g13300	0.861624	0.027397
Lawinal	Nta04g13300	0.900379	0.0143922
15-epi-Sibiricinone D	Nta04g13300	0.855311	0.029888
Fenbufen	Nta04g13300	0.908051	0.0122932
Guanosine	Nta04g13300	0.911559	0.0113867
Azaperone	Nta04g13300	-0.654064	0.158808
D-Myoinositol 4-phosphate	Nta04g13300	0.911888	0.0113034
Phe Trp Ser	Nta04g13300	0.812023	0.0496821
PA(18:3(6Z,9Z,12Z)/20:5(7Z,9Z,11E,13E,17Z)-3OH(5,6,15))	Nta04g13300	-0.837969	0.0372543
Diplotasin	Nta04g13300	0.894159	0.0162108
PGP(i-22:0/20:3(8Z,11Z,14Z)-2OH(5,6))	Nta04g13300	-0.895363	0.0158505
4,5-Dihydromelampodin B	Nta04g13300	-0.735471	0.0957079
4-(2-amino-3-hydroxyphenyl)-4-oxobutanoic acid O-glucoside	Nta04g13300	0.819373	0.0459924
Soyasaponin Ba	Nta04g13300	-0.772021	0.0720372
Ficiolide I	Nta04g13300	0.881224	0.0203237
Bistratamide J	Nta04g13300	-0.855432	0.029839
Niga-ichigoside F1	Nta04g13300	-0.753347	0.0837534
Prenylcandidusin B	Nta04g13300	0.814893	0.0482256
7-deacetyl-7-benzoylepoxyazadiradione	Nta04g13300	-0.774724	0.0704073
(R)-1-O-b-D-glucopyranosyl-1,3-octanediol	Nta04g13300	-0.902875	0.0136917
11beta-Hydroxycurvularin	Nta04g13300	-0.738058	0.093934
Malonyldaidzin	Nta04g13300	-0.651086	0.161373
Quercetin 3-rhamnosyl-(1->6)-glucosyl-(1->6)-galactoside	Nta04g13300	0.909801	0.0118368
Triandrin	Nta04g13300	-0.81773	0.0468059
3,5,6-Trihydroxy-5-(hydroxymethyl)-2-methoxy-2-cyclohexen-1-one	Nta04g13300	0.782132	0.066029
Benzyl beta-primeveroside	Nta04g13300	0.820056	0.0456567
Deoxygaudichaudione A	Nta04g13300	-0.947115	0.00412135
Mucronulatol-(4->5')-vestitol	Nta04g13300	0.858514	0.0286113
Callophycoic acid G	Nta04g13300	0.927241	0.00774814
Coriose	Nta04g13300	0.938958	0.00547542
Ilekudinoside K	Nta04g13300	-0.87562	0.0222436
Isohernandezine	Nta04g13300	0.78077	0.0668244
Saccharumoside A	Nta04g13300	0.822729	0.0443522
Iristectorin B	Nta04g13300	0.867466	0.025184
Revandchinone 3	Nta04g13300	-0.580283	0.227274
Pristanic acid	Nta04g13300	0.762228	0.0780821
Cinnamoyl putrescin	Nta04g13300	-0.89391	0.0162855
Alangiobussinine	Nta04g13300	-0.900247	0.0144297
N-Benzyloxycarbonylglycine	Nta04g13300	0.782183	0.0659995
5-O-Methylvisammioside	Nta04g13300	0.756068	0.081997
Antibiotic VM 44857	Nta04g13300	0.796778	0.0577525
Briarellin N	Nta04g13300	0.876406	0.0219693
Platenolide II	Nta04g13300	0.773113	0.071377
4-(beta-D-glucosyloxy)-3-hydroxy-benzoic acid	Nta04g13300	0.85082	0.031722
Swietenin B	Nta04g13300	-0.801336	0.0552807
Morusimic acid C	Nta04g13300	-0.919179	0.009534
Liensinine	Nta04g13300	0.837465	0.0374795
N-Acetyl-b-glucosaminylamine	Nta04g13300	0.923813	0.00848558
Delavayin B	Nta04g13300	0.821753	0.0448262
Isokuraramine	Nta04g13300	0.874641	0.0225874
Cyclopiazonic acid	Nta04g13300	0.872021	0.0235198
Tuberonic acid glucoside	Nta04g13300	0.72131	0.10568
Murrastifoline B	Nta04g13300	-0.7464	0.0883147
7-DESHYDROXYPYROGALLIN-4-CARBOXYLIC ACID	Nta04g13300	0.886019	0.0187472
2,3,4,5,2',6'-Hexamethoxy-3',4'-methylenedioxychalcone	Nta04g13300	-0.880334	0.0206233
Ma'eganedin A	Nta04g13300	-0.699149	0.122152
Neuraminic acid	Nta04g13300	0.914358	0.0106878
guanine	Nta04g13300	0.576241	0.23131
Zeanoside B	Nta04g13300	0.894908	0.0159862
Sucutinirane D	Nta04g13300	-0.842528	0.0352436
Arotinoid acid	Nta04g13300	-0.713212	0.111577
hypothemycin	Nta04g13300	-0.731968	0.098134
4-Hydroxyestrone	Nta04g13300	-0.867033	0.0253448
1-(13Z,16Z-docosadienoyl)-glycero-3-phosphate	Nta04g13300	0.88576	0.0188308
p-hydroxybenzoyl glucose	Nta04g13300	0.705583	0.117262
N,N-Dihydroxy-L-tryptophan	Nta04g13300	0.997605	8.59677e-06
Rhyncoside D	Nta04g13300	0.96548	0.00176685
trans-Aconitic acid	Nta04g13300	-0.839458	0.0365915
Tricalysioside R	Nta04g13300	0.771841	0.0721459
Decarbomethoxykopsifine	Nta04g13300	-0.738174	0.0938547
Ethyl gallate 4-glucuronide	Nta04g13300	0.632731	0.17756
Vinaginsenoside R12	Nta04g13300	0.845485	0.033968
N-trans-p-coumaroyloctopamine	Nta04g13300	0.876716	0.0218615
Miglustat	Nta04g13300	-0.89926	0.0147116
Cytidine-3'-monophosphate	Nta04g13300	0.90231	0.0138489
Artemisinin	Nta04g13300	-0.795551	0.058426
Bisphenol S	Nta04g13300	0.938286	0.00559541
Physalolactone B 3-glucoside	Nta04g13300	-0.663232	0.151023
Notopterol	Nta04g13300	-0.781894	0.0661676
Ingenol	Nta04g13300	0.826158	0.0427045
Integerrimide B	Nta04g13300	-0.811307	0.0500483
LysoPA(i-20:0/0:0)	Nta04g13300	0.701135	0.120633
Xylaroside B	Nta04g13300	-0.621832	0.187475
16alpha-Fluoroestradiol	Nta04g13300	-0.748795	0.08673
Angeloside	Nta04g13300	-0.741971	0.0912791
PA(20:4(8Z,11Z,14Z,17Z)/20:3(6,8,11)-OH(5))	Nta04g13300	-0.618175	0.190852
Corchoionoside B	Nta04g13300	-0.74109	0.0918733
Herbimycin B	Nta04g13300	-0.95018	0.00366125
Forskoditerpenoside D	Nta04g13300	0.706737	0.116394
Abyssinoflavanone IV	Nta04g13300	0.831026	0.0404161
D-Fructofuranose 1,2':2,3'-dianhydride	Nta04g13300	0.957142	0.00271582
Phytolaccagenin	Nta04g13300	-0.733661	0.0969578
Methohexital	Nta04g13300	-0.629004	0.180925
Botryoloic acid	Nta04g13300	0.558354	0.249505
Bidenoside C	Nta04g13300	-0.688472	0.130458
Sordarin-1-glucose ester	Nta04g13300	0.782133	0.0660285
Jasmonic acid	Nta04g13300	-0.851898	0.0312769
Tiegusanin M	Nta04g13300	-0.764501	0.0766595
Methyl camaralate	Nta04g13300	-0.780587	0.0669316
20-Deoxyingenol	Nta04g13300	0.663497	0.1508
PI(PGE2/16:1(9Z))	Nta04g13300	-0.774152	0.070751
Lactobionic acid	Nta04g13300	0.926977	0.00780375
Polanrazine D	Nta04g13300	0.80075	0.0555957
4-(2-Methoxyphenyl)-2-((5-methyl-1H-imidazol-4-yl)methyl)thiazole	Nta04g13300	0.91887	0.00960611
11-Beta-hydroxyandrostenedione	Nta04g13300	-0.689291	0.129812
Leu-Ala-Asp	Nta04g13300	-0.832244	0.0398528
Aferoside C	Nta04g13300	0.832887	0.0395567
Cys-Phe-Phe-Gly	Nta04g13300	0.590815	0.216893
Antanapeptin D	Nta04g13300	-0.758696	0.0803163
12-hydroxyheptadecanoic acid	Nta04g13300	0.809813	0.0508169
PE(LTE4/22:4(7Z,10Z,13Z,16Z))	Nta04g13300	-0.805365	0.0531377
PA(20:5(7Z,9Z,11E,13E,17Z)-3OH(5,6,15)/14:1(9Z))	Nta04g13300	-0.699658	0.121761
Decahydrogambogic Acid	Nta04g13300	-0.58125	0.226313
Androstene group	Nta04g13300	0.682001	0.135607
N-Acetyl-alpha-D-glucosamine 1-phosphate	Nta04g13300	0.884081	0.019377
1-Hydroxy-4-oxahomoadamantan-5-one	Nta04g13300	-0.824271	0.0436078
N-Ac-Tyr-Val-Ala-Asp-CHO	Nta04g13300	0.937653	0.00570962
Caffeine, 8-((3-methoxypropyl)amino)-	Nta04g13300	-0.584571	0.223024
Prostaglandin D2	Nta04g13300	0.888111	0.0180783
Platanionoside G	Nta04g13300	-0.79999	0.0560052
Striatisporin A	Nta04g13300	-0.633143	0.177189
Simplexin B	Nta04g13300	0.863451	0.0266956
Obyanamide	Nta04g13300	-0.71816	0.107957
13-Hydroxydocosanoic acid	Nta04g13300	0.70588	0.117038
Sorocein B	Nta04g13300	0.437632	0.38546
Hydnocarpic acid	Nta04g13300	0.799039	0.0565198
(S)-9-Hydroxy-10-undecenoic acid	Nta04g13300	-0.598846	0.209109
Linagliptin	Nta04g13300	0.854981	0.0300208
Nudicaulidine	Nta04g13300	-0.808987	0.0512441
Cocsilinine	Nta04g13300	0.951093	0.00352937
Virolanol C	Nta04g13300	0.92884	0.00741548
1-O-ethyl-N-acetyl-beta-D-glucosamine	Nta04g13300	-0.766287	0.0755497
Xanthone	Nta04g13300	0.896843	0.0154131
Prosapogenin A	Nta04g13300	-0.752444	0.08434
Elephanoside A	Nta04g13300	0.829598	0.0410813
PGP(17:0cycw7/15:0cycw5)	Nta04g13300	-0.927736	0.00764448
4-Geranyl-3,4',5-trihydroxystilbene	Nta04g13300	-0.664327	0.150103
bipinnatone A	Nta04g13300	0.723833	0.103871
Racemosic acid	Nta04g13300	0.70651	0.116565
Discarine F	Nta04g13300	0.7303	0.0992984
R(+)-2-(heptan-3-yl)quinazolin-4(3H)-one	Nta04g13300	-0.683866	0.134114
hesperadin	Nta04g13300	0.874905	0.0224945
Phenylacetaldehyde	Nta04g13300	0.759489	0.0798121
2-O-p-Coumaroyltartronic acid	Nta04g13300	0.890926	0.0171968
Tetranor-12R-HETE	Nta04g13300	-0.735244	0.0958647
Lys-Asp-Tyr	Nta04g13300	-0.797052	0.0576022
Boschniaside	Nta04g13300	-0.672095	0.143654
Goralatide	Nta04g13300	0.686069	0.13236
Graviphane	Nta04g13300	0.857469	0.029025
Beta-Zearalanol	Nta04g13300	-0.724074	0.103699
LPA(0:0/15:0)	Nta04g13300	0.967919	0.00152726
Isotachioside	Nta04g13300	0.884999	0.0190775
Forsythoside E	Nta04g13300	0.624249	0.185257
Heteroplexisolide E	Nta04g13300	-0.749031	0.0865745
Kadlongilactone E	Nta04g13300	-0.929626	0.00725451
Heptadecanoic acid	Nta04g13300	0.681539	0.135977
Micromelone B	Nta04g13300	0.837129	0.0376303
Euperfolitin	Nta04g13300	0.830418	0.0406988
O-Methylovaliflavanone C	Nta04g13300	0.817795	0.0467737
H-TRP-TRP-OH	Nta04g13300	0.905414	0.0129967
Prednisolone	Nta04g13300	0.904517	0.0132402
Magnesium protoporphyrin	Nta04g13300	0.790044	0.0614948
Nummularine F	Nta04g13300	0.831349	0.0402662
Lys Trp Lys	Nta04g13300	0.797871	0.0571548
Kamalachalcone A	Nta04g13300	0.66464	0.149841
Kanosamine 6-phosphate	Nta04g13300	0.78694	0.0632562
3-O-Acetylniduloic acid	Nta04g13300	0.625866	0.18378
H-Met-Asp-OH	Nta04g13300	0.831486	0.0402026
(E)-2-Methylgeranyl diphosphate	Nta04g13300	0.817561	0.0468897
Lansoprazole sulfone	Nta04g13300	0.708167	0.115323
3-Hydroxyisovaleric acid	Nta04g13300	0.747181	0.0877967
16alpha,17alpha-Dihydroxyprogesterone acetophenide	Nta04g13300	0.941013	0.00511658
Heleurine N-oxide	Nta04g13300	-0.779387	0.0676367
Cephalezomine J	Nta04g13300	0.862069	0.0272256
Rhodojaponin III	Nta04g13300	0.891939	0.016885
Cimigenoside	Nta04g13300	-0.828243	0.0417171
Isoalangiside	Nta04g13300	0.863315	0.0267474
Wahlenoside A	Nta04g13300	-0.596383	0.211484
Dimethoxyscytonemin	Nta04g13300	0.912488	0.0111525
N-(beta-D-glucosyl)nicotinate	Nta04g13300	0.82762	0.0420111
Denchryside A	Nta04g13300	-0.885676	0.0188577
Amoritin	Nta04g13300	-0.870965	0.0239009
(1S,2S)-3-Oxo-2[(2Z)-pentenyl]cyclopentane-1-butyric acid	Nta04g13300	0.692232	0.127506
Phlomiol	Nta04g13300	-0.827332	0.0421474
Rapanone	Nta04g13300	0.770883	0.0727279
4'-Demethylpodophyllotoxin	Nta04g13300	0.565269	0.242407
Trifochalcanoloside I	Nta04g13300	-0.861287	0.0275274
Gniditrin	Nta04g13300	0.885001	0.0190767
Vinpocetine	Nta04g13300	0.740655	0.092168
Suspensoside B	Nta04g13300	-0.783776	0.0650746
Proscillaridin A	Nta04g13300	-0.755808	0.082164
Kukoamine B	Nta04g13300	-0.777963	0.0684771
10-Phenyl-[12]-cytochalasins Z16	Nta04g13300	0.823639	0.0439123
(-)-Tetrazomine	Nta04g13300	0.802695	0.0545536
cis-10-Pentadecenoic acid	Nta04g13300	-0.686995	0.131625
Terragine D	Nta04g13300	0.609208	0.199237
N,N-Dimethylaniline N-oxide	Nta04g13300	0.738176	0.0938533
Vardenafil	Nta04g13300	0.808249	0.0516276
Estriol	Nta04g13300	0.802605	0.0546012
Piscerisoflavone E	Nta04g13300	-0.688173	0.130694
Vomifoliol 9-[glucosyl-(1->4)-xylosyl-(1->6)-glucoside]	Nta04g13300	0.644758	0.166881
S4:16(P3:14/F1:2)	Nta04g13300	0.787911	0.0627026
Broussonetine S	Nta04g13300	-0.78232	0.0659196
PA(18:2(9Z,11Z)/TXB2)	Nta04g13300	-0.728042	0.100885
D-glycero-L-galacto-Octulose	Nta04g13300	0.810013	0.0507138
Sesamoside	Nta04g13300	-0.712099	0.112399
Galbelgin	Nta04g13300	0.823355	0.0440493
Catalposide	Nta04g13300	-0.610884	0.197659
Paradol	Nta04g13300	-0.725968	0.102351
Reticuline N-oxide	Nta04g13300	0.86772	0.0250898
Glochidionolactone A	Nta04g13300	0.895905	0.0156897
Salidroside	Nta04g13300	0.82145	0.0449739
3-o-acetylbotcineric acid	Nta04g13300	0.970866	0.00126081
3-Hydroxyheptanoylcarnitine	Nta04g13300	-0.711036	0.113186
N-(1-Deoxy-1-fructosyl)alanine	Nta04g13300	0.867853	0.0250406
1-O-Methylisobractatin	Nta04g13300	-0.923766	0.00849589
Perilloside A	Nta04g13300	-0.72099	0.10591
Anemarsaponin E	Nta04g13300	-0.743398	0.0903188
N-cis-Feruloyldopamine	Nta04g13300	0.932075	0.00676405
Met Val Arg	Nta04g13300	0.747954	0.087285
Gibberellin A52	Nta04g13300	-0.654592	0.158355
N-Acetyl-L-aspartic acid	Nta04g13300	0.55543	0.252531
Carnosol	Nta04g13300	-0.62995	0.180068
Folinic acid	Nta04g13300	0.831281	0.0402976
Filipin III	Nta04g13300	0.530914	0.278453
Avermectin A1b monosaccharide	Nta04g13300	-0.836113	0.0380873
Jerantinine H	Nta04g13300	-0.868362	0.0248521
Paeonenoide A	Nta04g13300	-0.705234	0.117525
Foliasalacioside D	Nta04g13300	0.628881	0.181037
Aspernolide A	Nta04g13300	0.442515	0.379554
verminoside	Nta04g13300	0.849547	0.0322512
Dolichyl b-D-glucosyl phosphate	Nta04g13300	0.828754	0.0414769
2,3-Didehydrocinnzeylanone	Nta04g13300	-0.728211	0.100765
PGP(16:0/16:1(9Z))	Nta04g13300	-0.600055	0.207947
Anisomycin	Nta04g13300	-0.86557	0.0258925
Atractyloside I	Nta04g13300	0.803223	0.0542721
Sauvagnine	Nta04g13300	-0.727884	0.100996
Tryptoquivaline E	Nta04g13300	0.773781	0.0709742
Dendroside A	Nta04g13300	0.719276	0.107147
Epoxypheophorbide a	Nta04g13300	-0.765984	0.0757373
Alnespirone	Nta04g13300	-0.671045	0.144519
Glicophenone	Nta04g13300	-0.830254	0.040775
3-Hydroxyhept-4-enoylcarnitine	Nta04g13300	-0.599326	0.208648
Hypoloside A	Nta04g13300	0.807994	0.05176
Xylarenone D	Nta04g13300	0.64857	0.163553
Ulmicin D	Nta04g13300	-0.710099	0.113882
Dendronobiloside B	Nta04g13300	0.605647	0.202608
4-Methyl-3-oxoadipate	Nta04g13300	-0.882691	0.0198349
PGP(18:0/16:1(9Z))	Nta04g13300	-0.748313	0.0870478
Triflorestevione	Nta04g13300	-0.752835	0.084086
Skimmin	Nta04g13300	0.807098	0.0522279
Tyr Gln Phe	Nta04g13300	0.701403	0.120429
Rollicosin	Nta04g13300	0.770065	0.0732267
8,10-Dihydroxy-2,6,10-trimethyl-2,6,11-dodecatrien-4-one	Nta04g13300	0.933071	0.00656938
N-p-trans-Coumaroyltyramine	Nta04g13300	0.634284	0.176165
GMP	Nta04g13300	0.906734	0.0126421
(-)-Pereniporin A	Nta04g13300	0.857483	0.0290193
dehydrohistidyltryptophyldiketopiperazine	Nta04g13300	0.798625	0.0567447
Ritonavir	Nta04g13300	0.778356	0.0682448
Dolastatin 16	Nta04g13300	-0.801935	0.0549598
Harunmadagascarin D	Nta04g13300	0.829423	0.0411631
Scutellarein 7,4'-dimethyl ether 6-xylosyl-(1->2)-glucoside	Nta04g13300	0.557737	0.250142
Semilepidinoside A	Nta04g13300	0.569072	0.238537
isorhamnetin 3-rutinoside-7-glucoside	Nta04g13300	-0.818801	0.0462749
Glochidionolactone F	Nta04g13300	0.912189	0.0112276
Fraxin	Nta04g13300	0.992528	8.35441e-05
3-(3,4-Dihydroxyphenyl)lactic acid	Nta04g13300	0.930868	0.00700366
Galacturonic acid	Nta04g13300	0.636706	0.173999
Polyneuridine-N-oxide	Nta04g13300	-0.735144	0.0959336
Arachidonic acid	Nta04g13300	0.668806	0.14637
Biotin sulfoxide	Nta04g13300	0.682754	0.135003
PE-NMe(16:1(9Z)/15:0)	Nta04g13300	0.85767	0.0289452
beta-Kudinlactone	Nta04g13300	0.704625	0.117985
N1,N8-Bis(4-coumaroyl)spermidine	Nta04g13300	-0.709751	0.114141
Icariside A5	Nta04g13300	0.734885	0.0961117
axinastatin 3	Nta04g13300	-0.779912	0.0673275
Ilekudinoside P	Nta04g13300	-0.743136	0.0904948
alpha-Hederin	Nta04g13300	0.564547	0.243144
2,7-Di-tert-butyl-9-fluorenylmethyl chloroformate	Nta04g13300	-0.732201	0.0979717
(+-)-5-(1-Methylethyl)-2-(2-methylpropyl)-2-cyclohexen-1-one	Nta04g13300	0.728869	0.100302
Asticolorin A	Nta04g13300	0.811871	0.0497594
Tragopogonoside A	Nta04g13300	-0.757175	0.0812869
Bacopaside IV	Nta04g13300	-0.792938	0.0598732
Indolelactic acid	Nta04g13300	0.659419	0.15424
Avermectin B1a aglycone	Nta04g13300	0.610656	0.197873
PA(a-13:0/22:6(4Z,7Z,10Z,13E,15E,19Z)-OH(17))	Nta04g13300	-0.66272	0.151452
26-Glucosyl-1,3,11,22-tetrahydroxyergosta-5,24-dien-26-oate	Nta04g13300	-0.563333	0.244386
julocrotine	Nta04g13300	-0.559349	0.248479
8-MeSO-octyl-CN	Nta04g13300	-0.727631	0.101174
6-Desacetylscilliroside	Nta04g13300	-0.7641	0.0769092
Botryaloic acid	Nta04g13300	-0.813648	0.0488551
Indoleacrylic acid	Nta04g13300	0.666907	0.147948
1,5-Dimethylbarbituric acid	Nta04g13300	0.668912	0.146282
Bakankoside	Nta04g13300	0.861446	0.027466
2,4-diacetylphloroglucinol	Nta04g13300	-0.676254	0.140251
Microtoenin A	Nta04g13300	-0.831247	0.0403135
Cussovantoside C	Nta04g13300	-0.810846	0.0502847
Methyl 8-[3-(2-hydroxyoctyl)oxiran-2-yl]octanoate	Nta04g13300	0.654552	0.15839
(+)-Isotrilobine	Nta04g13300	-0.937548	0.00572853
Compound II(R/S)	Nta04g13300	0.640553	0.170582
2-(2,4-Dichloro-phenoxy)-N-(2-mercapto-ethyl)-acetamide	Nta04g13300	-0.668247	0.146834
PI(20:4(5Z,8Z,11Z,14Z)/PGF2alpha)	Nta04g13300	-0.801955	0.054949
10-Methoxycamptothecin	Nta04g13300	-0.537153	0.271764
LysoPS(16:0/0:0)	Nta04g13300	0.848618	0.0326402
Integrifoside C	Nta04g13300	0.832631	0.0396745
3-Deoxyoctulosonic acid	Nta04g13300	0.640353	0.170759
Phenyl salicylate	Nta04g13300	0.878309	0.0213119
5,4'-Dihydroxy-3,3'-dimethoxy-6,7-methylenedioxyflavone 4'-glucuronide	Nta04g13300	0.774868	0.0703211
Regaloside C	Nta04g13300	0.752754	0.0841388
2'-Deoxyuridine	Nta04g13300	0.716926	0.108855
Durantoside III	Nta04g13300	-0.658937	0.154649
Monodictyochrome B	Nta04g13300	0.917916	0.00983004
GlcAbeta1-6Galbeta	Nta04g13300	0.86739	0.025212
Europine N-oxide	Nta04g13300	-0.641646	0.169617
Isosalicin	Nta04g13300	0.842645	0.035193
Casearborin B	Nta04g13300	0.640076	0.171005
Demethylalangiside	Nta04g13300	0.84937	0.0323252
Oxyphencyclimine	Nta04g13300	0.944076	0.00460372
2-Keto-D-Gluconic acid	Nta04g13300	0.529437	0.280047
Biotin	Nta04g13300	-0.732744	0.097594
Spermidine	Nta04g13300	-0.662994	0.151222
Isoedulirin A	Nta04g13300	0.838739	0.0369109
Ganoderic acid I	Nta04g13300	-0.674885	0.141367
PI(5-iso PGF2VI/18:1(9Z))	Nta04g13300	-0.636365	0.174304
Acetyl-maltose	Nta04g13300	0.527811	0.281804
Longirabdolide G	Nta04g13300	0.876652	0.0218838
1-NBD-decanoyl-2-decanoyl-sn-Glycerol	Nta04g13300	-0.693561	0.126469
Lepidine E	Nta04g13300	-0.506543	0.305171
ROCCELLIC ACID	Nta04g13300	-0.640427	0.170694
2'-hydroxypyridoxol	Nta04g13300	0.617535	0.191446
Irenolone	Nta04g13300	0.480172	0.335097
Indole-3-carboxaldehyde	Nta04g13300	0.671165	0.14442
Psoralenoside	Nta04g13300	-0.563231	0.24449
Flupirtine	Nta04g13300	-0.83031	0.0407492
Epimedoicarisoside A	Nta04g13300	0.615854	0.193008
(+)-Plumosol	Nta04g13300	0.693486	0.126528
PA(12:0/10:0)	Nta04g13300	0.737121	0.094575
(S)-Panaxjapyne A	Nta04g13300	-0.796698	0.0577963
1-dodecylglycerone 3-phosphate	Nta04g13300	-0.575486	0.232067
Propyl 1-(propylsulfinyl)propyl disulfide	Nta04g13300	0.790273	0.0613656
Cinncassiol A 19-glucoside	Nta04g13300	0.588724	0.218938
Tetragonolide 2-methylbutyrate	Nta04g13300	0.626583	0.183125
Phaeofuran B	Nta04g13300	-0.658176	0.155295
Dinocton 6	Nta04g13300	0.680144	0.1371
Ile-Leu-Val-Tyr	Nta04g13300	0.785917	0.0638415
Arnicolide D	Nta04g13300	-0.725364	0.10278
Didrovaltrate acetoxy hydrin	Nta04g13300	0.940752	0.00516149
Lasalocid D	Nta04g13300	-0.772914	0.0714967
formycin b	Nta04g13300	0.838707	0.0369249
Hecogenin	Nta04g13300	0.889025	0.01779
10,11-dihydro-20-trihydroxy-leukotriene B4	Nta04g13300	0.541133	0.267529
Alternanthin	Nta04g13300	-0.697577	0.12336
Hosenkoside F	Nta04g13300	-0.719421	0.107043
Cibotiumbaroside A	Nta04g13300	0.821859	0.0447747
Sedumoside A5	Nta04g13300	0.603586	0.204569
Poncirin	Nta04g13300	-0.690846	0.12859
S4:18(P3:16/F1:2)	Nta04g13300	0.738217	0.0938256
Actinonin	Nta04g13300	0.689303	0.129803
Mappain	Nta04g13300	-0.573675	0.233887
(+)-Isoclavukerin A	Nta04g13300	0.735496	0.095691
Indole-3-acetyl-L-glutamic acid	Nta04g13300	0.930492	0.00707906
Brusatol	Nta04g13300	0.883857	0.0194505
6-Hydroxykaempferol 3,6-diglucoside	Nta04g13300	0.568718	0.238896
(-)-Brainic acid	Nta04g13300	0.697459	0.123451
Pacificanone A	Nta04g13300	0.734025	0.0967064
Stellettin J	Nta04g13300	0.736313	0.0951293
Ardisiaquinone E	Nta04g13300	-0.638707	0.172218
Inokosterone 20,22-acetonide	Nta04g13300	-0.655302	0.157747
Tehranolide	Nta04g13300	-0.765598	0.0759768
Ambroxide	Nta04g13300	0.867431	0.0251969
Phthalocyanine	Nta04g13300	0.93707	0.00581562
9,9'-O-di-(E)-feruloyl-(-)-secoisolariciresinol	Nta04g13300	0.791402	0.0607313
DL-Ornithino-L-alanine	Nta04g13300	-0.705553	0.117284
11,17-Dimethyl-5alpha-androstane-11beta,17beta-diol	Nta04g13300	0.766527	0.0754015
beta-Phenylethanol beta-D-rutinoside	Nta04g13300	-0.789814	0.0616244
L-phenylalanyl-L-histidine	Nta04g13300	0.578943	0.228609
Pyridinopyrone C1	Nta04g13300	-0.730947	0.0988458
Broussonetine M1	Nta04g13300	-0.753214	0.0838398
Dodecanoic acid	Nta04g13300	0.587049	0.220583
Prooxocryptochine	Nta04g13300	0.858962	0.0284347
Tectoridin	Nta04g13300	0.268774	0.606547
Striatin C	Nta04g13300	0.775751	0.0697932
Devenyoside B	Nta04g13300	0.785032	0.0643498
3,11-Dihydroxydodecanoylcarnitine	Nta04g13300	-0.569859	0.237739
6ALPHA-METHYL-11BETA-HYDROXYPROGESTERONE	Nta04g13300	0.844073	0.0345745
Withanoside XI	Nta04g13300	-0.679711	0.137449
Diphenyl(2,4,6-trimethylbenzoyl)phosphine oxide	Nta04g13300	0.787268	0.0630686
18-Demethylparaensidimerin C	Nta04g13300	0.912412	0.0111716
Vasicinone	Nta04g13300	0.890157	0.0174356
Trp Asp Tyr	Nta04g13300	-0.651063	0.161393
Lemmonin B	Nta04g13300	0.854933	0.0300404
3Z,6Z,9Z,18-Nonadecatetraene	Nta04g13300	0.782915	0.0655735
Millewanin B	Nta04g13300	-0.783468	0.0652528
7-Methylcoumarin	Nta04g13300	0.858016	0.028808
Deltonin	Nta04g13300	-0.744655	0.0894774
Aripiprazole	Nta04g13300	-0.873494	0.0229934
Dehydrorobustol A	Nta04g13300	-0.87754	0.0215765
Hydroxy Itraconazole	Nta04g13300	0.62762	0.182182
Methyl pentadecanoate	Nta04g13300	0.781006	0.0666863
Demethoxyencecalin	Nta04g13300	0.846477	0.0335449
3beta-Hydroxypregn-5-en-20-one sulfate	Nta04g13300	-0.827809	0.0419218
Ketazolam	Nta04g13300	0.730973	0.0988276
Bruceine D	Nta04g13300	0.886873	0.0184727
LysoPC(18:3(6Z,9Z,12Z)/0:0)	Nta04g13300	-0.748609	0.0868528
Pteroside S	Nta04g13300	0.769719	0.0734381
Icariol A1	Nta04g13300	-0.841959	0.0354918
Heptaethylene glycol	Nta04g13300	0.786498	0.0635088
D-Mannoheptulose	Nta04g13300	0.484557	0.330051
Didanosine	Nta03g35100	0.972185	0.00114973
Makaluvamine A	Nta03g35100	-0.863161	0.0268063
Sedumoside H	Nta03g35100	0.863234	0.0267783
6-(2-carboxy-6-hydroxyphenoxy)-3,4,5-trihydroxyoxane-2-carboxylic acid	Nta03g35100	0.99406	5.28273e-05
PS(14:0(3-OH)/14:0(3-OH))	Nta03g35100	-0.778281	0.068289
Pibocin B	Nta03g35100	-0.883529	0.0195581
Kahakamide A	Nta03g35100	0.943267	0.00473661
Phomamide	Nta03g35100	0.81459	0.0483782
Norgestimate	Nta03g35100	0.874913	0.0224916
2,4,6-Trimethyl-1,3,5-trithiane	Nta03g35100	0.829843	0.0409667
Glaucarubin	Nta03g35100	0.790091	0.0614682
TERNSTROSIDE C	Nta03g35100	-0.817722	0.0468095
2-O-Caffeoylglucarate	Nta03g35100	-0.885657	0.0188639
Lariciresinol acetate	Nta03g35100	-0.891338	0.0170695
2-Hydroxy-3-(beta-D-xylopyranosyloxy)benzoic acid	Nta03g35100	0.93594	0.00602409
Convallatoxin	Nta03g35100	0.886713	0.018524
Xylomollin	Nta03g35100	0.927102	0.00777742
PA(20:4(5Z,8Z,11Z,14Z)/22:6(4Z,7Z,10Z,13E,15E,19Z)-OH(17))	Nta03g35100	-0.786453	0.0635342
Leucylproline	Nta03g35100	0.891216	0.0171072
Lamiide	Nta03g35100	-0.810133	0.0506521
beta-D-Galactosyl-(1->4)-L-rhamnose	Nta03g35100	0.717157	0.108687
Crosatoside B	Nta03g35100	0.861485	0.0274508
Kanokoside C	Nta03g35100	0.896028	0.0156532
Nimbolide	Nta03g35100	0.852849	0.0308871
Dauricoside	Nta03g35100	0.86857	0.0247757
Epidermin	Nta03g35100	0.839914	0.0363901
(+)-Ixerin H	Nta03g35100	0.96507	0.0018089
Jujubasaponin VI	Nta03g35100	-0.846548	0.0335144
mannosylglucosylglyceric acid	Nta03g35100	0.96435	0.00188378
(+)-Ambruticin	Nta03g35100	-0.791437	0.0607115
5-Ethyl-3,4-dimethyl-2-furanundecanoic acid	Nta03g35100	0.881715	0.0201595
(3S,4S)-3-Hydroxytetradecane-1,3,4-tricarboxylate	Nta03g35100	0.722092	0.105117
Botcinic acid	Nta03g35100	0.889512	0.0176369
Kukoamine A	Nta03g35100	0.781026	0.0666746
N1-(2,4-Dimethoxybenzyl)-n2-(2-(pyridin-2-yl) ethyl)oxalamide	Nta03g35100	0.917557	0.00991509
5alpha-Androstane-3beta,7alpha,17beta-triol	Nta03g35100	0.843348	0.0348876
Paeoniflorin	Nta03g35100	-0.854113	0.0303719
Leu-Thr-Ser	Nta03g35100	-0.942738	0.00482461
Bilobalide	Nta03g35100	-0.876115	0.0220704
(-)-Simulanol	Nta03g35100	0.943014	0.00477862
FUMIQUINAZOLINE A	Nta03g35100	0.599525	0.208456
Coelovirin C	Nta03g35100	0.783636	0.0651557
Calleryanin	Nta03g35100	0.91629	0.0102179
Isoamoritin	Nta03g35100	-0.85061	0.031809
PGP(10:0/18:0)	Nta03g35100	-0.916293	0.010217
3,5,6,7,2',3',4'-Heptahydroxyflavone	Nta03g35100	0.773176	0.0713388
Rossicasin A	Nta03g35100	0.885919	0.0187794
Arzoxifene	Nta03g35100	0.837459	0.0374821
Ser Glu Glu	Nta03g35100	0.896228	0.0155941
longirostrerone B	Nta03g35100	-0.92687	0.0078264
PGP(12:0/14:0)	Nta03g35100	-0.841296	0.0357819
Pannellin	Nta03g35100	0.603992	0.204182
Paraibanol	Nta03g35100	0.87936	0.0209532
4-Methylgallic acid 3-glucuronide	Nta03g35100	0.868661	0.0247421
2-trans-O-Feruloylglucaric acid	Nta03g35100	0.927946	0.00760069
Forskoditerpenoside A	Nta03g35100	0.524384	0.285521
Loperamide	Nta03g35100	0.956091	0.00284962
7-hydroxy-L-tryptophan	Nta03g35100	0.886942	0.0184507
Pyrimethamine	Nta03g35100	0.904618	0.0132126
Saundersioside D	Nta03g35100	-0.754289	0.0831436
Saframycin R	Nta03g35100	-0.773772	0.0709795
7-Hydroxy-4H-chromen-4-one	Nta03g35100	0.909089	0.0120215
Ginkgolide J	Nta03g35100	0.975888	0.000865095
Lauryl sulfate	Nta03g35100	0.980897	0.000543899
Riboflavin	Nta03g35100	-0.763862	0.0770582
(+)-Hydroxypinoresinol 4,4'-di-O-beta-D-glucopyranoside	Nta03g35100	-0.803213	0.0542775
Speradine G	Nta03g35100	0.742646	0.090824
Asiaticoside B	Nta03g35100	0.792614	0.0600534
2,4-Divinylprotochlorophyllide	Nta03g35100	0.911718	0.0113465
Cistanoside F	Nta03g35100	-0.775451	0.0699721
His-Trp	Nta03g35100	0.869174	0.0245535
4-Hydroxyphenylacetylglutamic acid	Nta03g35100	-0.841363	0.0357526
Fraxinellone	Nta03g35100	-0.850262	0.0319534
Tamynine	Nta03g35100	0.795008	0.0587253
Licofelone	Nta03g35100	0.806838	0.0523639
Canrenone	Nta03g35100	-0.782642	0.0657322
Tenuiphenone B	Nta03g35100	0.617692	0.1913
PILOCARPINE	Nta03g35100	0.811365	0.0500186
Pyroglutamyl-3-methylhistidyl-prolinamide	Nta03g35100	-0.749937	0.0859788
Ajubractin D	Nta03g35100	-0.971116	0.00123936
Hesperetin	Nta03g35100	-0.923482	0.00855842
N-acetyl tyramine	Nta03g35100	0.872618	0.0233058
Dide-O-methylsimmondsin	Nta03g35100	0.762637	0.0778251
Globulusin A	Nta03g35100	0.800375	0.0557977
L-isoleucyl-L-proline	Nta03g35100	0.874306	0.0227055
Artoindonesianin P	Nta03g35100	0.864189	0.0264146
Trungapeptin A	Nta03g35100	-0.749659	0.0861613
Perseanol	Nta03g35100	0.884416	0.0192674
Pyranomammea B	Nta03g35100	0.96078	0.0022772
Amritoside A	Nta03g35100	0.971472	0.00120916
N-trans-Feruloyltyramine	Nta03g35100	0.957689	0.00264744
Sachalinoside A	Nta03g35100	0.653943	0.158912
Cyclo(4-hydroxy-R-Pro-S-Leu)	Nta03g35100	0.88506	0.0190576
Lawinal	Nta03g35100	0.89905	0.0147721
15-epi-Sibiricinone D	Nta03g35100	0.822248	0.0445857
Fenbufen	Nta03g35100	0.90554	0.0129626
Guanosine	Nta03g35100	0.901619	0.0140422
Azaperone	Nta03g35100	-0.642866	0.168542
D-Myoinositol 4-phosphate	Nta03g35100	0.918351	0.00972768
Phe Trp Ser	Nta03g35100	0.845371	0.0340166
PA(18:3(6Z,9Z,12Z)/20:5(7Z,9Z,11E,13E,17Z)-3OH(5,6,15))	Nta03g35100	-0.829047	0.0413393
Diplotasin	Nta03g35100	0.894668	0.0160579
PGP(i-22:0/20:3(8Z,11Z,14Z)-2OH(5,6))	Nta03g35100	-0.895949	0.0156767
4,5-Dihydromelampodin B	Nta03g35100	-0.725717	0.102529
4-(2-amino-3-hydroxyphenyl)-4-oxobutanoic acid O-glucoside	Nta03g35100	0.828879	0.0414181
Soyasaponin Ba	Nta03g35100	-0.770825	0.0727635
Ficiolide I	Nta03g35100	0.870496	0.024071
Bistratamide J	Nta03g35100	-0.85774	0.0289173
Niga-ichigoside F1	Nta03g35100	-0.755338	0.0824665
Prenylcandidusin B	Nta03g35100	0.832692	0.0396462
7-deacetyl-7-benzoylepoxyazadiradione	Nta03g35100	-0.764743	0.0765087
(R)-1-O-b-D-glucopyranosyl-1,3-octanediol	Nta03g35100	-0.904077	0.0133605
11beta-Hydroxycurvularin	Nta03g35100	-0.722153	0.105074
Malonyldaidzin	Nta03g35100	-0.655431	0.157636
Quercetin 3-rhamnosyl-(1->6)-glucosyl-(1->6)-galactoside	Nta03g35100	0.920884	0.00914138
Triandrin	Nta03g35100	-0.798113	0.0570233
3,5,6-Trihydroxy-5-(hydroxymethyl)-2-methoxy-2-cyclohexen-1-one	Nta03g35100	0.763024	0.0775825
Benzyl beta-primeveroside	Nta03g35100	0.797069	0.0575929
Deoxygaudichaudione A	Nta03g35100	-0.940906	0.00513496
Mucronulatol-(4->5')-vestitol	Nta03g35100	0.866496	0.0255452
Callophycoic acid G	Nta03g35100	0.939479	0.00538336
Coriose	Nta03g35100	0.928066	0.00757558
Ilekudinoside K	Nta03g35100	-0.875619	0.022244
Isohernandezine	Nta03g35100	0.752923	0.0840288
Saccharumoside A	Nta03g35100	0.849551	0.0322498
Iristectorin B	Nta03g35100	0.882208	0.0199954
Revandchinone 3	Nta03g35100	-0.564149	0.243551
Pristanic acid	Nta03g35100	0.738457	0.0936616
Cinnamoyl putrescin	Nta03g35100	-0.901653	0.0140325
Alangiobussinine	Nta03g35100	-0.89123	0.0171031
N-Benzyloxycarbonylglycine	Nta03g35100	0.807695	0.0519162
5-O-Methylvisammioside	Nta03g35100	0.730053	0.0994714
Antibiotic VM 44857	Nta03g35100	0.830195	0.0408028
Briarellin N	Nta03g35100	0.890368	0.01737
Platenolide II	Nta03g35100	0.740803	0.0920681
4-(beta-D-glucosyloxy)-3-hydroxy-benzoic acid	Nta03g35100	0.871139	0.0238377
Swietenin B	Nta03g35100	-0.81173	0.0498319
Morusimic acid C	Nta03g35100	-0.901722	0.0140132
Liensinine	Nta03g35100	0.828703	0.0415007
N-Acetyl-b-glucosaminylamine	Nta03g35100	0.900588	0.014333
Delavayin B	Nta03g35100	0.824115	0.0436826
Isokuraramine	Nta03g35100	0.898228	0.0150093
Cyclopiazonic acid	Nta03g35100	0.849024	0.0324701
Tuberonic acid glucoside	Nta03g35100	0.694358	0.12585
Murrastifoline B	Nta03g35100	-0.740187	0.0924848
7-DESHYDROXYPYROGALLIN-4-CARBOXYLIC ACID	Nta03g35100	0.897592	0.0151942
2,3,4,5,2',6'-Hexamethoxy-3',4'-methylenedioxychalcone	Nta03g35100	-0.874023	0.0228055
Ma'eganedin A	Nta03g35100	-0.683997	0.134009
Neuraminic acid	Nta03g35100	0.929448	0.00729084
guanine	Nta03g35100	0.619937	0.189222
Zeanoside B	Nta03g35100	0.906914	0.0125943
Sucutinirane D	Nta03g35100	-0.843985	0.0346125
Arotinoid acid	Nta03g35100	-0.71113	0.113116
hypothemycin	Nta03g35100	-0.712148	0.112362
4-Hydroxyestrone	Nta03g35100	-0.848808	0.0325603
1-(13Z,16Z-docosadienoyl)-glycero-3-phosphate	Nta03g35100	0.875841	0.0221663
p-hydroxybenzoyl glucose	Nta03g35100	0.717045	0.108768
N,N-Dihydroxy-L-tryptophan	Nta03g35100	0.998597	2.95252e-06
Rhyncoside D	Nta03g35100	0.961899	0.00214987
trans-Aconitic acid	Nta03g35100	-0.827628	0.0420075
Tricalysioside R	Nta03g35100	0.74213	0.0911719
Decarbomethoxykopsifine	Nta03g35100	-0.717856	0.108178
Ethyl gallate 4-glucuronide	Nta03g35100	0.604583	0.203619
Vinaginsenoside R12	Nta03g35100	0.866322	0.0256103
N-trans-p-coumaroyloctopamine	Nta03g35100	0.869949	0.0242702
Miglustat	Nta03g35100	-0.907153	0.0125306
Cytidine-3'-monophosphate	Nta03g35100	0.918501	0.00969239
Artemisinin	Nta03g35100	-0.799987	0.0560069
Bisphenol S	Nta03g35100	0.939237	0.00542605
Physalolactone B 3-glucoside	Nta03g35100	-0.667846	0.147167
Notopterol	Nta03g35100	-0.785562	0.0640454
Ingenol	Nta03g35100	0.856047	0.0295921
Integerrimide B	Nta03g35100	-0.801656	0.055109
LysoPA(i-20:0/0:0)	Nta03g35100	0.669702	0.145628
Xylaroside B	Nta03g35100	-0.621752	0.187549
16alpha-Fluoroestradiol	Nta03g35100	-0.733893	0.0967978
Angeloside	Nta03g35100	-0.748508	0.0869189
PA(20:4(8Z,11Z,14Z,17Z)/20:3(6,8,11)-OH(5))	Nta03g35100	-0.627989	0.181847
Corchoionoside B	Nta03g35100	-0.741243	0.0917705
Herbimycin B	Nta03g35100	-0.94339	0.00471633
Forskoditerpenoside D	Nta03g35100	0.710931	0.113264
Abyssinoflavanone IV	Nta03g35100	0.838558	0.0369914
D-Fructofuranose 1,2':2,3'-dianhydride	Nta03g35100	0.953121	0.00324491
Phytolaccagenin	Nta03g35100	-0.737727	0.09416
Methohexital	Nta03g35100	-0.656895	0.156386
Botryoloic acid	Nta03g35100	0.518022	0.292472
Bidenoside C	Nta03g35100	-0.657862	0.155562
Sordarin-1-glucose ester	Nta03g35100	0.752991	0.0839846
Jasmonic acid	Nta03g35100	-0.855604	0.02977
Tiegusanin M	Nta03g35100	-0.774906	0.0702983
Methyl camaralate	Nta03g35100	-0.780829	0.0667899
20-Deoxyingenol	Nta03g35100	0.707449	0.11586
PI(PGE2/16:1(9Z))	Nta03g35100	-0.779993	0.0672799
Lactobionic acid	Nta03g35100	0.92038	0.00925656
Polanrazine D	Nta03g35100	0.826446	0.0425677
4-(2-Methoxyphenyl)-2-((5-methyl-1H-imidazol-4-yl)methyl)thiazole	Nta03g35100	0.896228	0.0155943
11-Beta-hydroxyandrostenedione	Nta03g35100	-0.671915	0.143802
Leu-Ala-Asp	Nta03g35100	-0.824083	0.0436984
Aferoside C	Nta03g35100	0.856315	0.0294849
Cys-Phe-Phe-Gly	Nta03g35100	0.55924	0.248591
Antanapeptin D	Nta03g35100	-0.764725	0.0765198
12-hydroxyheptadecanoic acid	Nta03g35100	0.780171	0.0671758
PE(LTE4/22:4(7Z,10Z,13Z,16Z))	Nta03g35100	-0.808721	0.0513823
PA(20:5(7Z,9Z,11E,13E,17Z)-3OH(5,6,15)/14:1(9Z))	Nta03g35100	-0.698687	0.122506
Decahydrogambogic Acid	Nta03g35100	-0.565671	0.241997
Androstene group	Nta03g35100	0.663702	0.150628
N-Acetyl-alpha-D-glucosamine 1-phosphate	Nta03g35100	0.87616	0.0220548
1-Hydroxy-4-oxahomoadamantan-5-one	Nta03g35100	-0.831652	0.0401262
N-Ac-Tyr-Val-Ala-Asp-CHO	Nta03g35100	0.933633	0.00646068
Caffeine, 8-((3-methoxypropyl)amino)-	Nta03g35100	-0.59316	0.214608
Prostaglandin D2	Nta03g35100	0.864323	0.0263636
Platanionoside G	Nta03g35100	-0.792347	0.0602024
Striatisporin A	Nta03g35100	-0.630377	0.179683
Simplexin B	Nta03g35100	0.861306	0.0275202
Obyanamide	Nta03g35100	-0.703698	0.118685
13-Hydroxydocosanoic acid	Nta03g35100	0.719472	0.107006
Sorocein B	Nta03g35100	0.41348	0.415126
Hydnocarpic acid	Nta03g35100	0.83179	0.040062
(S)-9-Hydroxy-10-undecenoic acid	Nta03g35100	-0.598598	0.209347
Linagliptin	Nta03g35100	0.826741	0.0424275
Nudicaulidine	Nta03g35100	-0.776081	0.069596
Cocsilinine	Nta03g35100	0.954265	0.0030897
Virolanol C	Nta03g35100	0.943549	0.00469015
1-O-ethyl-N-acetyl-beta-D-glucosamine	Nta03g35100	-0.769437	0.0736108
Xanthone	Nta03g35100	0.914882	0.0105594
Prosapogenin A	Nta03g35100	-0.750625	0.0855277
Elephanoside A	Nta03g35100	0.855534	0.0297981
PGP(17:0cycw7/15:0cycw5)	Nta03g35100	-0.930722	0.00703295
4-Geranyl-3,4',5-trihydroxystilbene	Nta03g35100	-0.670337	0.145103
bipinnatone A	Nta03g35100	0.720262	0.106435
Racemosic acid	Nta03g35100	0.666516	0.148273
Discarine F	Nta03g35100	0.713114	0.111649
R(+)-2-(heptan-3-yl)quinazolin-4(3H)-one	Nta03g35100	-0.687031	0.131597
hesperadin	Nta03g35100	0.846057	0.0337236
Phenylacetaldehyde	Nta03g35100	0.768906	0.0739357
2-O-p-Coumaroyltartronic acid	Nta03g35100	0.887775	0.0181849
Tetranor-12R-HETE	Nta03g35100	-0.743348	0.0903522
Lys-Asp-Tyr	Nta03g35100	-0.801732	0.0550684
Boschniaside	Nta03g35100	-0.660204	0.153575
Goralatide	Nta03g35100	0.718087	0.10801
Graviphane	Nta03g35100	0.83486	0.0386549
Beta-Zearalanol	Nta03g35100	-0.707966	0.115473
LPA(0:0/15:0)	Nta03g35100	0.954379	0.00307438
Isotachioside	Nta03g35100	0.85522	0.0299244
Forsythoside E	Nta03g35100	0.66913	0.146101
Heteroplexisolide E	Nta03g35100	-0.715293	0.110048
Kadlongilactone E	Nta03g35100	-0.917628	0.00989823
Heptadecanoic acid	Nta03g35100	0.65652	0.156706
Micromelone B	Nta03g35100	0.81013	0.0506533
Euperfolitin	Nta03g35100	0.831608	0.0401464
O-Methylovaliflavanone C	Nta03g35100	0.791505	0.0606735
H-TRP-TRP-OH	Nta03g35100	0.924747	0.00828151
Prednisolone	Nta03g35100	0.919868	0.0093744
Magnesium protoporphyrin	Nta03g35100	0.812988	0.0491899
Nummularine F	Nta03g35100	0.800921	0.0555038
Lys Trp Lys	Nta03g35100	0.79017	0.0614234
Kamalachalcone A	Nta03g35100	0.631772	0.178424
Kanosamine 6-phosphate	Nta03g35100	0.810141	0.0506476
3-O-Acetylniduloic acid	Nta03g35100	0.595162	0.212666
H-Met-Asp-OH	Nta03g35100	0.843085	0.0350016
(E)-2-Methylgeranyl diphosphate	Nta03g35100	0.802665	0.0545693
Lansoprazole sulfone	Nta03g35100	0.681774	0.135788
3-Hydroxyisovaleric acid	Nta03g35100	0.776842	0.0691425
16alpha,17alpha-Dihydroxyprogesterone acetophenide	Nta03g35100	0.94745	0.00406963
Heleurine N-oxide	Nta03g35100	-0.779708	0.0674478
Cephalezomine J	Nta03g35100	0.85589	0.029655
Rhodojaponin III	Nta03g35100	0.880533	0.0205558
Cimigenoside	Nta03g35100	-0.816155	0.0475917
Isoalangiside	Nta03g35100	0.867424	0.0251996
Wahlenoside A	Nta03g35100	-0.595999	0.211855
Dimethoxyscytonemin	Nta03g35100	0.892554	0.0166968
N-(beta-D-glucosyl)nicotinate	Nta03g35100	0.828592	0.0415531
Denchryside A	Nta03g35100	-0.880437	0.0205882
Amoritin	Nta03g35100	-0.860113	0.0279838
(1S,2S)-3-Oxo-2[(2Z)-pentenyl]cyclopentane-1-butyric acid	Nta03g35100	0.685101	0.133129
Phlomiol	Nta03g35100	-0.828425	0.0416316
Rapanone	Nta03g35100	0.73818	0.0938506
4'-Demethylpodophyllotoxin	Nta03g35100	0.599517	0.208464
Trifochalcanoloside I	Nta03g35100	-0.870476	0.0240782
Gniditrin	Nta03g35100	0.898111	0.0150433
Vinpocetine	Nta03g35100	0.711563	0.112795
Suspensoside B	Nta03g35100	-0.784948	0.0643983
Proscillaridin A	Nta03g35100	-0.726477	0.101991
Kukoamine B	Nta03g35100	-0.756103	0.0819745
10-Phenyl-[12]-cytochalasins Z16	Nta03g35100	0.82736	0.0421339
(-)-Tetrazomine	Nta03g35100	0.772853	0.0715337
cis-10-Pentadecenoic acid	Nta03g35100	-0.671486	0.144155
Terragine D	Nta03g35100	0.583687	0.223898
N,N-Dimethylaniline N-oxide	Nta03g35100	0.738072	0.0939242
Vardenafil	Nta03g35100	0.774781	0.0703732
Estriol	Nta03g35100	0.777933	0.0684952
Piscerisoflavone E	Nta03g35100	-0.695841	0.1247
Vomifoliol 9-[glucosyl-(1->4)-xylosyl-(1->6)-glucoside]	Nta03g35100	0.611327	0.197242
S4:16(P3:14/F1:2)	Nta03g35100	0.753365	0.0837417
Broussonetine S	Nta03g35100	-0.784718	0.0645306
PA(18:2(9Z,11Z)/TXB2)	Nta03g35100	-0.726629	0.101883
D-glycero-L-galacto-Octulose	Nta03g35100	0.79504	0.0587077
Sesamoside	Nta03g35100	-0.723293	0.104257
Galbelgin	Nta03g35100	0.803978	0.053871
Catalposide	Nta03g35100	-0.625382	0.184222
Paradol	Nta03g35100	-0.70894	0.114746
Reticuline N-oxide	Nta03g35100	0.888686	0.0178966
Glochidionolactone A	Nta03g35100	0.910012	0.0117824
Salidroside	Nta03g35100	0.848907	0.0325189
3-o-acetylbotcineric acid	Nta03g35100	0.978821	0.000668059
3-Hydroxyheptanoylcarnitine	Nta03g35100	-0.724344	0.103507
N-(1-Deoxy-1-fructosyl)alanine	Nta03g35100	0.850529	0.0318428
1-O-Methylisobractatin	Nta03g35100	-0.908941	0.0120601
Perilloside A	Nta03g35100	-0.733722	0.096916
Anemarsaponin E	Nta03g35100	-0.742117	0.0911802
N-cis-Feruloyldopamine	Nta03g35100	0.944058	0.00460667
Met Val Arg	Nta03g35100	0.74722	0.0877707
Gibberellin A52	Nta03g35100	-0.627917	0.181912
N-Acetyl-L-aspartic acid	Nta03g35100	0.601615	0.206452
Carnosol	Nta03g35100	-0.607752	0.200613
Folinic acid	Nta03g35100	0.814103	0.0486245
Filipin III	Nta03g35100	0.532698	0.276534
Avermectin A1b monosaccharide	Nta03g35100	-0.83314	0.0394405
Jerantinine H	Nta03g35100	-0.865881	0.0257757
Paeonenoide A	Nta03g35100	-0.686363	0.132127
Foliasalacioside D	Nta03g35100	0.612848	0.195815
Aspernolide A	Nta03g35100	0.458659	0.360255
verminoside	Nta03g35100	0.820541	0.0454185
Dolichyl b-D-glucosyl phosphate	Nta03g35100	0.848291	0.0327775
2,3-Didehydrocinnzeylanone	Nta03g35100	-0.722579	0.104768
PGP(16:0/16:1(9Z))	Nta03g35100	-0.605644	0.202611
Anisomycin	Nta03g35100	-0.870159	0.0241936
Atractyloside I	Nta03g35100	0.784605	0.0645959
Sauvagnine	Nta03g35100	-0.715451	0.109933
Tryptoquivaline E	Nta03g35100	0.752494	0.0843075
Dendroside A	Nta03g35100	0.676594	0.139974
Epoxypheophorbide a	Nta03g35100	-0.759267	0.0799529
Alnespirone	Nta03g35100	-0.641793	0.169487
Glicophenone	Nta03g35100	-0.810613	0.0504048
3-Hydroxyhept-4-enoylcarnitine	Nta03g35100	-0.618108	0.190914
Hypoloside A	Nta03g35100	0.783591	0.0651819
Xylarenone D	Nta03g35100	0.671021	0.144538
Ulmicin D	Nta03g35100	-0.71091	0.11328
Dendronobiloside B	Nta03g35100	0.567198	0.24044
4-Methyl-3-oxoadipate	Nta03g35100	-0.88883	0.0178513
PGP(18:0/16:1(9Z))	Nta03g35100	-0.745652	0.0888119
Triflorestevione	Nta03g35100	-0.750062	0.0858967
Skimmin	Nta03g35100	0.769966	0.0732871
Tyr Gln Phe	Nta03g35100	0.686638	0.131908
Rollicosin	Nta03g35100	0.740313	0.0923998
8,10-Dihydroxy-2,6,10-trimethyl-2,6,11-dodecatrien-4-one	Nta03g35100	0.951434	0.00348069
N-p-trans-Coumaroyltyramine	Nta03g35100	0.674161	0.141959
GMP	Nta03g35100	0.919708	0.00941143
(-)-Pereniporin A	Nta03g35100	0.878631	0.0212017
dehydrohistidyltryptophyldiketopiperazine	Nta03g35100	0.795784	0.0582977
Ritonavir	Nta03g35100	0.754428	0.0830539
Dolastatin 16	Nta03g35100	-0.810333	0.0505487
Harunmadagascarin D	Nta03g35100	0.800764	0.0555884
Scutellarein 7,4'-dimethyl ether 6-xylosyl-(1->2)-glucoside	Nta03g35100	0.517521	0.293022
Semilepidinoside A	Nta03g35100	0.588702	0.218961
isorhamnetin 3-rutinoside-7-glucoside	Nta03g35100	-0.822067	0.0446737
Glochidionolactone F	Nta03g35100	0.927295	0.00773689
Fraxin	Nta03g35100	0.992328	8.80725e-05
3-(3,4-Dihydroxyphenyl)lactic acid	Nta03g35100	0.915261	0.0104668
Galacturonic acid	Nta03g35100	0.652295	0.160329
Polyneuridine-N-oxide	Nta03g35100	-0.70052	0.121102
Arachidonic acid	Nta03g35100	0.633883	0.176525
Biotin sulfoxide	Nta03g35100	0.661321	0.152631
PE-NMe(16:1(9Z)/15:0)	Nta03g35100	0.836657	0.0378423
beta-Kudinlactone	Nta03g35100	0.733851	0.0968265
N1,N8-Bis(4-coumaroyl)spermidine	Nta03g35100	-0.712229	0.112303
Icariside A5	Nta03g35100	0.769082	0.0738278
axinastatin 3	Nta03g35100	-0.776146	0.0695573
Ilekudinoside P	Nta03g35100	-0.739509	0.0929455
alpha-Hederin	Nta03g35100	0.529103	0.280407
2,7-Di-tert-butyl-9-fluorenylmethyl chloroformate	Nta03g35100	-0.704511	0.118071
(+-)-5-(1-Methylethyl)-2-(2-methylpropyl)-2-cyclohexen-1-one	Nta03g35100	0.698891	0.12235
Asticolorin A	Nta03g35100	0.781952	0.0661341
Tragopogonoside A	Nta03g35100	-0.755416	0.0824166
Bacopaside IV	Nta03g35100	-0.789907	0.0615721
Indolelactic acid	Nta03g35100	0.645917	0.165865
Avermectin B1a aglycone	Nta03g35100	0.655434	0.157634
PA(a-13:0/22:6(4Z,7Z,10Z,13E,15E,19Z)-OH(17))	Nta03g35100	-0.662994	0.151222
26-Glucosyl-1,3,11,22-tetrahydroxyergosta-5,24-dien-26-oate	Nta03g35100	-0.566881	0.240763
julocrotine	Nta03g35100	-0.539838	0.268904
8-MeSO-octyl-CN	Nta03g35100	-0.728039	0.100887
6-Desacetylscilliroside	Nta03g35100	-0.746942	0.0879547
Botryaloic acid	Nta03g35100	-0.810845	0.0502854
Indoleacrylic acid	Nta03g35100	0.654559	0.158383
1,5-Dimethylbarbituric acid	Nta03g35100	0.677221	0.139465
Bakankoside	Nta03g35100	0.890078	0.0174603
2,4-diacetylphloroglucinol	Nta03g35100	-0.676505	0.140047
Microtoenin A	Nta03g35100	-0.827472	0.042081
Cussovantoside C	Nta03g35100	-0.81535	0.0479954
Methyl 8-[3-(2-hydroxyoctyl)oxiran-2-yl]octanoate	Nta03g35100	0.642825	0.168578
(+)-Isotrilobine	Nta03g35100	-0.928586	0.00746783
Compound II(R/S)	Nta03g35100	0.684503	0.133606
2-(2,4-Dichloro-phenoxy)-N-(2-mercapto-ethyl)-acetamide	Nta03g35100	-0.665713	0.148943
PI(20:4(5Z,8Z,11Z,14Z)/PGF2alpha)	Nta03g35100	-0.811954	0.0497174
10-Methoxycamptothecin	Nta03g35100	-0.510381	0.300903
LysoPS(16:0/0:0)	Nta03g35100	0.834633	0.0387584
Integrifoside C	Nta03g35100	0.821624	0.0448893
3-Deoxyoctulosonic acid	Nta03g35100	0.608439	0.199963
Phenyl salicylate	Nta03g35100	0.882903	0.0197646
5,4'-Dihydroxy-3,3'-dimethoxy-6,7-methylenedioxyflavone 4'-glucuronide	Nta03g35100	0.737753	0.0941423
Regaloside C	Nta03g35100	0.758501	0.0804406
2'-Deoxyuridine	Nta03g35100	0.712798	0.111882
Durantoside III	Nta03g35100	-0.656662	0.156585
Monodictyochrome B	Nta03g35100	0.90017	0.0144517
GlcAbeta1-6Galbeta	Nta03g35100	0.865215	0.0260263
Europine N-oxide	Nta03g35100	-0.645482	0.166246
Isosalicin	Nta03g35100	0.83649	0.0379176
Casearborin B	Nta03g35100	0.63535	0.175211
Demethylalangiside	Nta03g35100	0.825358	0.0430867
Oxyphencyclimine	Nta03g35100	0.946286	0.00425025
2-Keto-D-Gluconic acid	Nta03g35100	0.54118	0.267479
Biotin	Nta03g35100	-0.723774	0.103913
Spermidine	Nta03g35100	-0.657337	0.156009
Isoedulirin A	Nta03g35100	0.807643	0.0519429
Ganoderic acid I	Nta03g35100	-0.641245	0.16997
PI(5-iso PGF2VI/18:1(9Z))	Nta03g35100	-0.647903	0.164133
Acetyl-maltose	Nta03g35100	0.496038	0.316969
Longirabdolide G	Nta03g35100	0.861264	0.0275364
1-NBD-decanoyl-2-decanoyl-sn-Glycerol	Nta03g35100	-0.68146	0.136041
Lepidine E	Nta03g35100	-0.494018	0.319257
ROCCELLIC ACID	Nta03g35100	-0.608179	0.200208
2'-hydroxypyridoxol	Nta03g35100	0.602652	0.20546
Irenolone	Nta03g35100	0.444782	0.376823
Indole-3-carboxaldehyde	Nta03g35100	0.657178	0.156145
Psoralenoside	Nta03g35100	-0.583149	0.22443
Flupirtine	Nta03g35100	-0.807887	0.0518157
Epimedoicarisoside A	Nta03g35100	0.616666	0.192252
(+)-Plumosol	Nta03g35100	0.671021	0.144539
PA(12:0/10:0)	Nta03g35100	0.712649	0.111993
(S)-Panaxjapyne A	Nta03g35100	-0.782805	0.0656378
1-dodecylglycerone 3-phosphate	Nta03g35100	-0.592624	0.21513
Propyl 1-(propylsulfinyl)propyl disulfide	Nta03g35100	0.783024	0.0655103
Cinncassiol A 19-glucoside	Nta03g35100	0.569789	0.23781
Tetragonolide 2-methylbutyrate	Nta03g35100	0.607622	0.200736
Phaeofuran B	Nta03g35100	-0.666897	0.147957
Dinocton 6	Nta03g35100	0.659469	0.154198
Ile-Leu-Val-Tyr	Nta03g35100	0.763347	0.0773801
Arnicolide D	Nta03g35100	-0.735993	0.0953488
Didrovaltrate acetoxy hydrin	Nta03g35100	0.928073	0.00757422
Lasalocid D	Nta03g35100	-0.757267	0.0812279
formycin b	Nta03g35100	0.807169	0.0521904
Hecogenin	Nta03g35100	0.874333	0.0226961
10,11-dihydro-20-trihydroxy-leukotriene B4	Nta03g35100	0.495148	0.317976
Alternanthin	Nta03g35100	-0.704789	0.117861
Hosenkoside F	Nta03g35100	-0.721006	0.105898
Cibotiumbaroside A	Nta03g35100	0.840582	0.0360954
Sedumoside A5	Nta03g35100	0.578691	0.228861
Poncirin	Nta03g35100	-0.677979	0.13885
S4:18(P3:16/F1:2)	Nta03g35100	0.703061	0.119168
Actinonin	Nta03g35100	0.720097	0.106554
Mappain	Nta03g35100	-0.561387	0.246381
(+)-Isoclavukerin A	Nta03g35100	0.701763	0.120155
Indole-3-acetyl-L-glutamic acid	Nta03g35100	0.910607	0.0116294
Brusatol	Nta03g35100	0.881806	0.020129
6-Hydroxykaempferol 3,6-diglucoside	Nta03g35100	0.610653	0.197876
(-)-Brainic acid	Nta03g35100	0.708778	0.114866
Pacificanone A	Nta03g35100	0.698411	0.122718
Stellettin J	Nta03g35100	0.765961	0.0757518
Ardisiaquinone E	Nta03g35100	-0.629712	0.180284
Inokosterone 20,22-acetonide	Nta03g35100	-0.641277	0.169943
Tehranolide	Nta03g35100	-0.777534	0.0687314
Ambroxide	Nta03g35100	0.85466	0.0301505
Phthalocyanine	Nta03g35100	0.937923	0.00566076
9,9'-O-di-(E)-feruloyl-(-)-secoisolariciresinol	Nta03g35100	0.756484	0.0817301
DL-Ornithino-L-alanine	Nta03g35100	-0.665703	0.148952
11,17-Dimethyl-5alpha-androstane-11beta,17beta-diol	Nta03g35100	0.738501	0.0936314
beta-Phenylethanol beta-D-rutinoside	Nta03g35100	-0.789533	0.0617833
L-phenylalanyl-L-histidine	Nta03g35100	0.625923	0.183727
Pyridinopyrone C1	Nta03g35100	-0.729814	0.0996388
Broussonetine M1	Nta03g35100	-0.769157	0.0737821
Dodecanoic acid	Nta03g35100	0.575341	0.232213
Prooxocryptochine	Nta03g35100	0.883839	0.0194562
Tectoridin	Nta03g35100	0.268307	0.607198
Striatin C	Nta03g35100	0.80172	0.0550745
Devenyoside B	Nta03g35100	0.778069	0.0684146
3,11-Dihydroxydodecanoylcarnitine	Nta03g35100	-0.585216	0.222388
6ALPHA-METHYL-11BETA-HYDROXYPROGESTERONE	Nta03g35100	0.811136	0.0501363
Withanoside XI	Nta03g35100	-0.677831	0.13897
Diphenyl(2,4,6-trimethylbenzoyl)phosphine oxide	Nta03g35100	0.803265	0.0542498
18-Demethylparaensidimerin C	Nta03g35100	0.888051	0.0180974
Vasicinone	Nta03g35100	0.90375	0.0134503
Trp Asp Tyr	Nta03g35100	-0.622485	0.186875
Lemmonin B	Nta03g35100	0.839311	0.0366567
3Z,6Z,9Z,18-Nonadecatetraene	Nta03g35100	0.754413	0.0830634
Millewanin B	Nta03g35100	-0.769019	0.0738669
7-Methylcoumarin	Nta03g35100	0.848768	0.0325772
Deltonin	Nta03g35100	-0.746752	0.0880811
Aripiprazole	Nta03g35100	-0.869554	0.0244143
Dehydrorobustol A	Nta03g35100	-0.875454	0.0223015
Hydroxy Itraconazole	Nta03g35100	0.59868	0.209269
Methyl pentadecanoate	Nta03g35100	0.778921	0.0679112
Demethoxyencecalin	Nta03g35100	0.827478	0.0420784
3beta-Hydroxypregn-5-en-20-one sulfate	Nta03g35100	-0.824527	0.0434848
Ketazolam	Nta03g35100	0.755504	0.0823596
Bruceine D	Nta03g35100	0.908672	0.0121303
LysoPC(18:3(6Z,9Z,12Z)/0:0)	Nta03g35100	-0.73096	0.0988368
Pteroside S	Nta03g35100	0.769915	0.0733185
Icariol A1	Nta03g35100	-0.840926	0.0359443
Heptaethylene glycol	Nta03g35100	0.758992	0.0801278
D-Mannoheptulose	Nta03g35100	0.523976	0.285965
Didanosine	Nta11g20760	0.916467	0.0101752
Makaluvamine A	Nta11g20760	-0.859086	0.0283861
Sedumoside H	Nta11g20760	0.836957	0.0377075
6-(2-carboxy-6-hydroxyphenoxy)-3,4,5-trihydroxyoxane-2-carboxylic acid	Nta11g20760	0.95935	0.00244511
PS(14:0(3-OH)/14:0(3-OH))	Nta11g20760	-0.774273	0.0706782
Pibocin B	Nta11g20760	-0.894511	0.016105
Kahakamide A	Nta11g20760	0.911375	0.0114335
Phomamide	Nta11g20760	0.890008	0.017482
Norgestimate	Nta11g20760	0.824229	0.0436279
2,4,6-Trimethyl-1,3,5-trithiane	Nta11g20760	0.85798	0.0288224
Glaucarubin	Nta11g20760	0.857818	0.0288866
TERNSTROSIDE C	Nta11g20760	-0.807065	0.0522448
2-O-Caffeoylglucarate	Nta11g20760	-0.888143	0.0180681
Lariciresinol acetate	Nta11g20760	-0.925063	0.0082129
2-Hydroxy-3-(beta-D-xylopyranosyloxy)benzoic acid	Nta11g20760	0.914311	0.0106993
Convallatoxin	Nta11g20760	0.874783	0.0225373
Xylomollin	Nta11g20760	0.901423	0.0140971
PA(20:4(5Z,8Z,11Z,14Z)/22:6(4Z,7Z,10Z,13E,15E,19Z)-OH(17))	Nta11g20760	-0.787077	0.0631775
Leucylproline	Nta11g20760	0.797726	0.0572341
Lamiide	Nta11g20760	-0.835524	0.0383537
beta-D-Galactosyl-(1->4)-L-rhamnose	Nta11g20760	0.818889	0.0462316
Crosatoside B	Nta11g20760	0.891929	0.016888
Kanokoside C	Nta11g20760	0.901874	0.0139707
Nimbolide	Nta11g20760	0.866535	0.0255305
Dauricoside	Nta11g20760	0.748385	0.087
Epidermin	Nta11g20760	0.913797	0.0108262
(+)-Ixerin H	Nta11g20760	0.991229	0.000115057
Jujubasaponin VI	Nta11g20760	-0.863355	0.0267322
mannosylglucosylglyceric acid	Nta11g20760	0.93769	0.0057028
(+)-Ambruticin	Nta11g20760	-0.856182	0.0295379
5-Ethyl-3,4-dimethyl-2-furanundecanoic acid	Nta11g20760	0.956359	0.00281529
(3S,4S)-3-Hydroxytetradecane-1,3,4-tricarboxylate	Nta11g20760	0.804551	0.0535674
Botcinic acid	Nta11g20760	0.929733	0.00723275
Kukoamine A	Nta11g20760	0.823182	0.0441327
N1-(2,4-Dimethoxybenzyl)-n2-(2-(pyridin-2-yl) ethyl)oxalamide	Nta11g20760	0.820575	0.0454021
5alpha-Androstane-3beta,7alpha,17beta-triol	Nta11g20760	0.93536	0.00613237
Paeoniflorin	Nta11g20760	-0.854118	0.0303699
Leu-Thr-Ser	Nta11g20760	-0.932896	0.00660333
Bilobalide	Nta11g20760	-0.869209	0.0245407
(-)-Simulanol	Nta11g20760	0.89814	0.0150347
FUMIQUINAZOLINE A	Nta11g20760	0.460011	0.358655
Coelovirin C	Nta11g20760	0.84536	0.0340211
Calleryanin	Nta11g20760	0.860667	0.0277679
Isoamoritin	Nta11g20760	-0.858068	0.0287876
PGP(10:0/18:0)	Nta11g20760	-0.919284	0.00950963
3,5,6,7,2',3',4'-Heptahydroxyflavone	Nta11g20760	0.885363	0.0189593
Rossicasin A	Nta11g20760	0.869579	0.0244052
Arzoxifene	Nta11g20760	0.707769	0.11562
Ser Glu Glu	Nta11g20760	0.801296	0.055302
longirostrerone B	Nta11g20760	-0.929095	0.00736312
PGP(12:0/14:0)	Nta11g20760	-0.853564	0.030595
Pannellin	Nta11g20760	0.672485	0.143333
Paraibanol	Nta11g20760	0.838804	0.036882
4-Methylgallic acid 3-glucuronide	Nta11g20760	0.801378	0.0552584
2-trans-O-Feruloylglucaric acid	Nta11g20760	0.965498	0.00176506
Forskoditerpenoside A	Nta11g20760	0.63415	0.176286
Loperamide	Nta11g20760	0.911553	0.0113882
7-hydroxy-L-tryptophan	Nta11g20760	0.915561	0.010394
Pyrimethamine	Nta11g20760	0.865731	0.0258318
Saundersioside D	Nta11g20760	-0.765527	0.0760208
Saframycin R	Nta11g20760	-0.772335	0.0718467
7-Hydroxy-4H-chromen-4-one	Nta11g20760	0.9609	0.0022633
Ginkgolide J	Nta11g20760	0.988316	0.00020397
Lauryl sulfate	Nta11g20760	0.952448	0.00333804
Riboflavin	Nta11g20760	-0.837492	0.0374676
(+)-Hydroxypinoresinol 4,4'-di-O-beta-D-glucopyranoside	Nta11g20760	-0.813214	0.0490753
Speradine G	Nta11g20760	0.826423	0.0425788
Asiaticoside B	Nta11g20760	0.678287	0.138601
2,4-Divinylprotochlorophyllide	Nta11g20760	0.931352	0.00690702
Cistanoside F	Nta11g20760	-0.783666	0.0651384
His-Trp	Nta11g20760	0.768951	0.0739082
4-Hydroxyphenylacetylglutamic acid	Nta11g20760	-0.911586	0.0113799
Fraxinellone	Nta11g20760	-0.915659	0.0103701
Tamynine	Nta11g20760	0.763616	0.0772119
Licofelone	Nta11g20760	0.908347	0.0122155
Canrenone	Nta11g20760	-0.769858	0.0733533
Tenuiphenone B	Nta11g20760	0.648865	0.163297
PILOCARPINE	Nta11g20760	0.67419	0.141935
Pyroglutamyl-3-methylhistidyl-prolinamide	Nta11g20760	-0.749459	0.0862928
Ajubractin D	Nta11g20760	-0.984898	0.000340389
Hesperetin	Nta11g20760	-0.920609	0.00920408
N-acetyl tyramine	Nta11g20760	0.776687	0.0692349
Dide-O-methylsimmondsin	Nta11g20760	0.815097	0.0481226
Globulusin A	Nta11g20760	0.848404	0.03273
L-isoleucyl-L-proline	Nta11g20760	0.787726	0.0628076
Artoindonesianin P	Nta11g20760	0.849892	0.0321073
Trungapeptin A	Nta11g20760	-0.735893	0.0954178
Perseanol	Nta11g20760	0.943559	0.00468847
Pyranomammea B	Nta11g20760	0.927474	0.00769918
Amritoside A	Nta11g20760	0.967496	0.00156756
N-trans-Feruloyltyramine	Nta11g20760	0.895238	0.0158877
Sachalinoside A	Nta11g20760	0.768719	0.0740505
Cyclo(4-hydroxy-R-Pro-S-Leu)	Nta11g20760	0.779293	0.0676921
Lawinal	Nta11g20760	0.875078	0.0224334
15-epi-Sibiricinone D	Nta11g20760	0.919379	0.00948754
Fenbufen	Nta11g20760	0.886354	0.0186391
Guanosine	Nta11g20760	0.940162	0.00526383
Azaperone	Nta11g20760	-0.65894	0.154646
D-Myoinositol 4-phosphate	Nta11g20760	0.89047	0.0173382
Phe Trp Ser	Nta11g20760	0.727119	0.101536
PA(18:3(6Z,9Z,12Z)/20:5(7Z,9Z,11E,13E,17Z)-3OH(5,6,15))	Nta11g20760	-0.855688	0.0297364
Diplotasin	Nta11g20760	0.872107	0.0234889
PGP(i-22:0/20:3(8Z,11Z,14Z)-2OH(5,6))	Nta11g20760	-0.883125	0.0196915
4,5-Dihydromelampodin B	Nta11g20760	-0.754943	0.082721
4-(2-amino-3-hydroxyphenyl)-4-oxobutanoic acid O-glucoside	Nta11g20760	0.783983	0.0649548
Soyasaponin Ba	Nta11g20760	-0.778267	0.0682972
Ficiolide I	Nta11g20760	0.897304	0.0152782
Bistratamide J	Nta11g20760	-0.864272	0.0263829
Niga-ichigoside F1	Nta11g20760	-0.749017	0.0865835
Prenylcandidusin B	Nta11g20760	0.7802	0.0671588
7-deacetyl-7-benzoylepoxyazadiradione	Nta11g20760	-0.784414	0.0647058
(R)-1-O-b-D-glucopyranosyl-1,3-octanediol	Nta11g20760	-0.904731	0.0131819
11beta-Hydroxycurvularin	Nta11g20760	-0.768977	0.0738924
Malonyldaidzin	Nta11g20760	-0.62552	0.184095
Quercetin 3-rhamnosyl-(1->6)-glucosyl-(1->6)-galactoside	Nta11g20760	0.852509	0.0310261
Triandrin	Nta11g20760	-0.876572	0.0219116
3,5,6-Trihydroxy-5-(hydroxymethyl)-2-methoxy-2-cyclohexen-1-one	Nta11g20760	0.837249	0.0375764
Benzyl beta-primeveroside	Nta11g20760	0.88498	0.0190835
Deoxygaudichaudione A	Nta11g20760	-0.960122	0.00235362
Mucronulatol-(4->5')-vestitol	Nta11g20760	0.848108	0.0328548
Callophycoic acid G	Nta11g20760	0.873411	0.0230229
Coriose	Nta11g20760	0.943708	0.00466392
Ilekudinoside K	Nta11g20760	-0.882907	0.0197633
Isohernandezine	Nta11g20760	0.856559	0.0293871
Saccharumoside A	Nta11g20760	0.74986	0.0860294
Iristectorin B	Nta11g20760	0.842897	0.0350831
Revandchinone 3	Nta11g20760	-0.594781	0.213035
Pristanic acid	Nta11g20760	0.82058	0.0453996
Cinnamoyl putrescin	Nta11g20760	-0.883531	0.0195576
Alangiobussinine	Nta11g20760	-0.93037	0.00710367
N-Benzyloxycarbonylglycine	Nta11g20760	0.703854	0.118567
5-O-Methylvisammioside	Nta11g20760	0.82301	0.0442162
Antibiotic VM 44857	Nta11g20760	0.719345	0.107098
Briarellin N	Nta11g20760	0.841122	0.035858
Platenolide II	Nta11g20760	0.850342	0.0319203
4-(beta-D-glucosyloxy)-3-hydroxy-benzoic acid	Nta11g20760	0.810306	0.0505627
Swietenin B	Nta11g20760	-0.79641	0.0579542
Morusimic acid C	Nta11g20760	-0.949094	0.0038211
Liensinine	Nta11g20760	0.816016	0.0476611
N-Acetyl-b-glucosaminylamine	Nta11g20760	0.956245	0.00282985
Delavayin B	Nta11g20760	0.780009	0.0672705
Isokuraramine	Nta11g20760	0.793894	0.0593419
Cyclopiazonic acid	Nta11g20760	0.928335	0.00751974
Tuberonic acid glucoside	Nta11g20760	0.796316	0.0580055
Murrastifoline B	Nta11g20760	-0.738769	0.0934491
7-DESHYDROXYPYROGALLIN-4-CARBOXYLIC ACID	Nta11g20760	0.843429	0.0348526
2,3,4,5,2',6'-Hexamethoxy-3',4'-methylenedioxychalcone	Nta11g20760	-0.898577	0.0149082
Ma'eganedin A	Nta11g20760	-0.713327	0.111492
Neuraminic acid	Nta11g20760	0.854361	0.0302714
guanine	Nta11g20760	0.484342	0.330297
Zeanoside B	Nta11g20760	0.866632	0.0254945
Sucutinirane D	Nta11g20760	-0.839185	0.0367129
Arotinoid acid	Nta11g20760	-0.714723	0.110466
hypothemycin	Nta11g20760	-0.789717	0.0616794
4-Hydroxyestrone	Nta11g20760	-0.913856	0.0108115
1-(13Z,16Z-docosadienoyl)-glycero-3-phosphate	Nta11g20760	0.916658	0.0101294
p-hydroxybenzoyl glucose	Nta11g20760	0.686187	0.132266
N,N-Dihydroxy-L-tryptophan	Nta11g20760	0.981992	0.000483512
Rhyncoside D	Nta11g20760	0.96417	0.00190273
trans-Aconitic acid	Nta11g20760	-0.878499	0.0212469
Tricalysioside R	Nta11g20760	0.842499	0.0352562
Decarbomethoxykopsifine	Nta11g20760	-0.793103	0.0597811
Ethyl gallate 4-glucuronide	Nta11g20760	0.711348	0.112955
Vinaginsenoside R12	Nta11g20760	0.770474	0.0729772
N-trans-p-coumaroyloctopamine	Nta11g20760	0.905604	0.0129455
Miglustat	Nta11g20760	-0.887395	0.018306
Cytidine-3'-monophosphate	Nta11g20760	0.841391	0.0357401
Artemisinin	Nta11g20760	-0.79589	0.0582398
Bisphenol S	Nta11g20760	0.923779	0.00849308
Physalolactone B 3-glucoside	Nta11g20760	-0.659931	0.153807
Notopterol	Nta11g20760	-0.793293	0.0596754
Ingenol	Nta11g20760	0.732938	0.0974598
Integerrimide B	Nta11g20760	-0.831422	0.0402324
LysoPA(i-20:0/0:0)	Nta11g20760	0.7727	0.0716259
Xylaroside B	Nta11g20760	-0.643197	0.16825
16alpha-Fluoroestradiol	Nta11g20760	-0.787287	0.063058
Angeloside	Nta11g20760	-0.716663	0.109047
PA(20:4(8Z,11Z,14Z,17Z)/20:3(6,8,11)-OH(5))	Nta11g20760	-0.612018	0.196594
Corchoionoside B	Nta11g20760	-0.745561	0.088873
Herbimycin B	Nta11g20760	-0.962262	0.00210931
Forskoditerpenoside D	Nta11g20760	0.718606	0.107633
Abyssinoflavanone IV	Nta11g20760	0.827086	0.0422639
D-Fructofuranose 1,2':2,3'-dianhydride	Nta11g20760	0.940031	0.00528659
Phytolaccagenin	Nta11g20760	-0.73488	0.0961155
Methohexital	Nta11g20760	-0.562762	0.244971
Botryoloic acid	Nta11g20760	0.665936	0.148757
Bidenoside C	Nta11g20760	-0.756681	0.0816032
Sordarin-1-glucose ester	Nta11g20760	0.858211	0.0287307
Jasmonic acid	Nta11g20760	-0.855753	0.0297101
Tiegusanin M	Nta11g20760	-0.724623	0.103308
Methyl camaralate	Nta11g20760	-0.791616	0.0606114
20-Deoxyingenol	Nta11g20760	0.552654	0.255416
PI(PGE2/16:1(9Z))	Nta11g20760	-0.772778	0.0715792
Lactobionic acid	Nta11g20760	0.90733	0.0124837
Polanrazine D	Nta11g20760	0.745797	0.0887153
4-(2-Methoxyphenyl)-2-((5-methyl-1H-imidazol-4-yl)methyl)thiazole	Nta11g20760	0.959975	0.00237094
11-Beta-hydroxyandrostenedione	Nta11g20760	-0.713218	0.111573
Leu-Ala-Asp	Nta11g20760	-0.852963	0.0308403
Aferoside C	Nta11g20760	0.753472	0.0836725
Cys-Phe-Phe-Gly	Nta11g20760	0.682524	0.135187
Antanapeptin D	Nta11g20760	-0.74815	0.0871555
12-hydroxyheptadecanoic acid	Nta11g20760	0.877171	0.0217037
PE(LTE4/22:4(7Z,10Z,13Z,16Z))	Nta11g20760	-0.804203	0.0537514
PA(20:5(7Z,9Z,11E,13E,17Z)-3OH(5,6,15)/14:1(9Z))	Nta11g20760	-0.710134	0.113856
Decahydrogambogic Acid	Nta11g20760	-0.594871	0.212948
Androstene group	Nta11g20760	0.747259	0.0877449
N-Acetyl-alpha-D-glucosamine 1-phosphate	Nta11g20760	0.864393	0.0263372
1-Hydroxy-4-oxahomoadamantan-5-one	Nta11g20760	-0.814253	0.0485484
N-Ac-Tyr-Val-Ala-Asp-CHO	Nta11g20760	0.9304	0.00709758
Caffeine, 8-((3-methoxypropyl)amino)-	Nta11g20760	-0.568793	0.23882
Prostaglandin D2	Nta11g20760	0.933271	0.00653056
Platanionoside G	Nta11g20760	-0.834772	0.0386951
Striatisporin A	Nta11g20760	-0.659114	0.154499
Simplexin B	Nta11g20760	0.860268	0.0279232
Obyanamide	Nta11g20760	-0.736967	0.0946801
13-Hydroxydocosanoic acid	Nta11g20760	0.69716	0.123681
Sorocein B	Nta11g20760	0.528009	0.28159
Hydnocarpic acid	Nta11g20760	0.70505	0.117663
(S)-9-Hydroxy-10-undecenoic acid	Nta11g20760	-0.617172	0.191783
Linagliptin	Nta11g20760	0.921383	0.00902802
Nudicaulidine	Nta11g20760	-0.87897	0.0210859
Cocsilinine	Nta11g20760	0.94587	0.00431578
Virolanol C	Nta11g20760	0.87327	0.0230732
1-O-ethyl-N-acetyl-beta-D-glucosamine	Nta11g20760	-0.759999	0.0794886
Xanthone	Nta11g20760	0.836712	0.0378177
Prosapogenin A	Nta11g20760	-0.764764	0.0764956
Elephanoside A	Nta11g20760	0.751233	0.0851303
PGP(17:0cycw7/15:0cycw5)	Nta11g20760	-0.923013	0.00866244
4-Geranyl-3,4',5-trihydroxystilbene	Nta11g20760	-0.67044	0.145018
bipinnatone A	Nta11g20760	0.733327	0.0971899
Racemosic acid	Nta11g20760	0.796424	0.0579465
Discarine F	Nta11g20760	0.794528	0.0589908
R(+)-2-(heptan-3-yl)quinazolin-4(3H)-one	Nta11g20760	-0.681077	0.136349
hesperadin	Nta11g20760	0.937039	0.00582137
Phenylacetaldehyde	Nta11g20760	0.736674	0.0948813
2-O-p-Coumaroyltartronic acid	Nta11g20760	0.896881	0.0154019
Tetranor-12R-HETE	Nta11g20760	-0.726679	0.101847
Lys-Asp-Tyr	Nta11g20760	-0.801794	0.055035
Boschniaside	Nta11g20760	-0.678894	0.13811
Goralatide	Nta11g20760	0.590749	0.216958
Graviphane	Nta11g20760	0.916184	0.0102433
Beta-Zearalanol	Nta11g20760	-0.776543	0.0693207
LPA(0:0/15:0)	Nta11g20760	0.985887	0.00029737
Isotachioside	Nta11g20760	0.937118	0.00580686
Forsythoside E	Nta11g20760	0.518594	0.291844
Heteroplexisolide E	Nta11g20760	-0.822868	0.0442849
Kadlongilactone E	Nta11g20760	-0.957016	0.00273179
Heptadecanoic acid	Nta11g20760	0.757168	0.0812913
Micromelone B	Nta11g20760	0.87863	0.0212022
Euperfolitin	Nta11g20760	0.800726	0.0556085
O-Methylovaliflavanone C	Nta11g20760	0.873792	0.0228874
H-TRP-TRP-OH	Nta11g20760	0.854789	0.0300985
Prednisolone	Nta11g20760	0.837341	0.0375351
Magnesium protoporphyrin	Nta11g20760	0.750219	0.0857939
Nummularine F	Nta11g20760	0.883307	0.0196314
Lys Trp Lys	Nta11g20760	0.830903	0.0404729
Kamalachalcone A	Nta11g20760	0.756906	0.081459
Kanosamine 6-phosphate	Nta11g20760	0.710632	0.113486
3-O-Acetylniduloic acid	Nta11g20760	0.717876	0.108164
H-Met-Asp-OH	Nta11g20760	0.767974	0.0745082
(E)-2-Methylgeranyl diphosphate	Nta11g20760	0.811141	0.0501333
Lansoprazole sulfone	Nta11g20760	0.784307	0.0647675
3-Hydroxyisovaleric acid	Nta11g20760	0.685854	0.13253
16alpha,17alpha-Dihydroxyprogesterone acetophenide	Nta11g20760	0.918635	0.00966097
Heleurine N-oxide	Nta11g20760	-0.776873	0.0691244
Cephalezomine J	Nta11g20760	0.891241	0.0170997
Rhodojaponin III	Nta11g20760	0.880317	0.0206288
Cimigenoside	Nta11g20760	-0.850049	0.0320421
Isoalangiside	Nta11g20760	0.831321	0.0402792
Wahlenoside A	Nta11g20760	-0.60469	0.203518
Dimethoxyscytonemin	Nta11g20760	0.953419	0.00320409
N-(beta-D-glucosyl)nicotinate	Nta11g20760	0.805834	0.0528906
Denchryside A	Nta11g20760	-0.900381	0.0143917
Amoritin	Nta11g20760	-0.887173	0.0183767
(1S,2S)-3-Oxo-2[(2Z)-pentenyl]cyclopentane-1-butyric acid	Nta11g20760	0.680222	0.137037
Phlomiol	Nta11g20760	-0.839925	0.0363852
Rapanone	Nta11g20760	0.840887	0.0359611
4'-Demethylpodophyllotoxin	Nta11g20760	0.489924	0.323912
Trifochalcanoloside I	Nta11g20760	-0.848383	0.0327389
Gniditrin	Nta11g20760	0.821818	0.0447948
Vinpocetine	Nta11g20760	0.819537	0.0459119
Suspensoside B	Nta11g20760	-0.798569	0.0567754
Proscillaridin A	Nta11g20760	-0.827985	0.0418387
Kukoamine B	Nta11g20760	-0.828966	0.0413772
10-Phenyl-[12]-cytochalasins Z16	Nta11g20760	0.789169	0.0619891
(-)-Tetrazomine	Nta11g20760	0.874812	0.0225272
cis-10-Pentadecenoic acid	Nta11g20760	-0.70488	0.117792
Terragine D	Nta11g20760	0.69091	0.12854
N,N-Dimethylaniline N-oxide	Nta11g20760	0.728963	0.100236
Vardenafil	Nta11g20760	0.862356	0.0271147
Estriol	Nta11g20760	0.825019	0.0432486
Piscerisoflavone E	Nta11g20760	-0.684063	0.133957
Vomifoliol 9-[glucosyl-(1->4)-xylosyl-(1->6)-glucoside]	Nta11g20760	0.700328	0.121249
S4:16(P3:14/F1:2)	Nta11g20760	0.870707	0.0239943
Broussonetine S	Nta11g20760	-0.791402	0.0607311
PA(18:2(9Z,11Z)/TXB2)	Nta11g20760	-0.736905	0.0947227
D-glycero-L-galacto-Octulose	Nta11g20760	0.80181	0.0550268
Sesamoside	Nta11g20760	-0.692897	0.126987
Galbelgin	Nta11g20760	0.850606	0.0318108
Catalposide	Nta11g20760	-0.587109	0.220523
Paradol	Nta11g20760	-0.753345	0.0837551
Reticuline N-oxide	Nta11g20760	0.795264	0.0585844
Glochidionolactone A	Nta11g20760	0.847959	0.0329175
Salidroside	Nta11g20760	0.757538	0.0810551
3-o-acetylbotcineric acid	Nta11g20760	0.944876	0.0044743
3-Hydroxyheptanoylcarnitine	Nta11g20760	-0.676959	0.139678
N-(1-Deoxy-1-fructosyl)alanine	Nta11g20760	0.882496	0.0198995
1-O-Methylisobractatin	Nta11g20760	-0.958559	0.0025405
Perilloside A	Nta11g20760	-0.704839	0.117823
Anemarsaponin E	Nta11g20760	-0.754231	0.0831809
N-cis-Feruloyldopamine	Nta11g20760	0.882394	0.0199333
Met Val Arg	Nta11g20760	0.726942	0.101661
Gibberellin A52	Nta11g20760	-0.709214	0.114541
N-Acetyl-L-aspartic acid	Nta11g20760	0.436524	0.386804
Carnosol	Nta11g20760	-0.668984	0.146222
Folinic acid	Nta11g20760	0.860994	0.027641
Filipin III	Nta11g20760	0.549297	0.258923
Avermectin A1b monosaccharide	Nta11g20760	-0.846034	0.0337333
Jerantinine H	Nta11g20760	-0.883026	0.0197242
Paeonenoide A	Nta11g20760	-0.759111	0.0800523
Foliasalacioside D	Nta11g20760	0.687538	0.131196
Aspernolide A	Nta11g20760	0.43916	0.383608
verminoside	Nta11g20760	0.907939	0.0123228
Dolichyl b-D-glucosyl phosphate	Nta11g20760	0.756688	0.081599
2,3-Didehydrocinnzeylanone	Nta11g20760	-0.756314	0.0818392
PGP(16:0/16:1(9Z))	Nta11g20760	-0.608216	0.200174
Anisomycin	Nta11g20760	-0.860141	0.027973
Atractyloside I	Nta11g20760	0.821313	0.0450408
Sauvagnine	Nta11g20760	-0.77059	0.0729066
Tryptoquivaline E	Nta11g20760	0.804186	0.0537607
Dendroside A	Nta11g20760	0.812095	0.0496451
Epoxypheophorbide a	Nta11g20760	-0.7835	0.0652342
Alnespirone	Nta11g20760	-0.746939	0.0879571
Glicophenone	Nta11g20760	-0.888373	0.0179954
3-Hydroxyhept-4-enoylcarnitine	Nta11g20760	-0.589095	0.218575
Hypoloside A	Nta11g20760	0.863129	0.0268183
Xylarenone D	Nta11g20760	0.606745	0.201566
Ulmicin D	Nta11g20760	-0.71788	0.10816
Dendronobiloside B	Nta11g20760	0.709464	0.114354
4-Methyl-3-oxoadipate	Nta11g20760	-0.877735	0.0215091
PGP(18:0/16:1(9Z))	Nta11g20760	-0.759359	0.0798945
Triflorestevione	Nta11g20760	-0.740628	0.0921862
Skimmin	Nta11g20760	0.880888	0.0204367
Tyr Gln Phe	Nta11g20760	0.755531	0.0823424
Rollicosin	Nta11g20760	0.817665	0.0468383
8,10-Dihydroxy-2,6,10-trimethyl-2,6,11-dodecatrien-4-one	Nta11g20760	0.869659	0.0243759
N-p-trans-Coumaroyltyramine	Nta11g20760	0.553028	0.255028
GMP	Nta11g20760	0.875995	0.0221125
(-)-Pereniporin A	Nta11g20760	0.804446	0.0536232
dehydrohistidyltryptophyldiketopiperazine	Nta11g20760	0.824519	0.0434883
Ritonavir	Nta11g20760	0.843994	0.0346085
Dolastatin 16	Nta11g20760	-0.79602	0.0581683
Harunmadagascarin D	Nta11g20760	0.899753	0.0145704
Scutellarein 7,4'-dimethyl ether 6-xylosyl-(1->2)-glucoside	Nta11g20760	0.66917	0.146068
Semilepidinoside A	Nta11g20760	0.54604	0.262344
isorhamnetin 3-rutinoside-7-glucoside	Nta11g20760	-0.8257	0.0429229
Glochidionolactone F	Nta11g20760	0.880698	0.0205005
Fraxin	Nta11g20760	0.974335	0.00097962
3-(3,4-Dihydroxyphenyl)lactic acid	Nta11g20760	0.955659	0.0029056
Galacturonic acid	Nta11g20760	0.579059	0.228494
Polyneuridine-N-oxide	Nta11g20760	-0.808222	0.0516415
Arachidonic acid	Nta11g20760	0.764589	0.0766045
Biotin sulfoxide	Nta11g20760	0.706437	0.11662
PE-NMe(16:1(9Z)/15:0)	Nta11g20760	0.91441	0.0106749
beta-Kudinlactone	Nta11g20760	0.627897	0.18193
N1,N8-Bis(4-coumaroyl)spermidine	Nta11g20760	-0.706139	0.116843
Icariside A5	Nta11g20760	0.631468	0.178698
axinastatin 3	Nta11g20760	-0.793108	0.0597783
Ilekudinoside P	Nta11g20760	-0.755413	0.0824183
alpha-Hederin	Nta11g20760	0.668961	0.146241
2,7-Di-tert-butyl-9-fluorenylmethyl chloroformate	Nta11g20760	-0.800758	0.0555913
(+-)-5-(1-Methylethyl)-2-(2-methylpropyl)-2-cyclohexen-1-one	Nta11g20760	0.79746	0.0573795
Asticolorin A	Nta11g20760	0.886822	0.0184889
Tragopogonoside A	Nta11g20760	-0.764594	0.0766015
Bacopaside IV	Nta11g20760	-0.793179	0.0597391
Indolelactic acid	Nta11g20760	0.649808	0.162479
Avermectin B1a aglycone	Nta11g20760	0.509256	0.302151
PA(a-13:0/22:6(4Z,7Z,10Z,13E,15E,19Z)-OH(17))	Nta11g20760	-0.690363	0.12897
26-Glucosyl-1,3,11,22-tetrahydroxyergosta-5,24-dien-26-oate	Nta11g20760	-0.571423	0.236157
julocrotine	Nta11g20760	-0.581588	0.225978
8-MeSO-octyl-CN	Nta11g20760	-0.706316	0.11671
6-Desacetylscilliroside	Nta11g20760	-0.800725	0.055609
Botryaloic acid	Nta11g20760	-0.838876	0.0368501
Indoleacrylic acid	Nta11g20760	0.654897	0.158094
1,5-Dimethylbarbituric acid	Nta11g20760	0.65929	0.154349
Bakankoside	Nta11g20760	0.782098	0.0660486
2,4-diacetylphloroglucinol	Nta11g20760	-0.677427	0.139298
Microtoenin A	Nta11g20760	-0.845889	0.0337954
Cussovantoside C	Nta11g20760	-0.809621	0.0509163
Methyl 8-[3-(2-hydroxyoctyl)oxiran-2-yl]octanoate	Nta11g20760	0.708455	0.115107
(+)-Isotrilobine	Nta11g20760	-0.956021	0.00285871
Compound II(R/S)	Nta11g20760	0.535423	0.273613
2-(2,4-Dichloro-phenoxy)-N-(2-mercapto-ethyl)-acetamide	Nta11g20760	-0.687639	0.131116
PI(20:4(5Z,8Z,11Z,14Z)/PGF2alpha)	Nta11g20760	-0.789359	0.0618815
10-Methoxycamptothecin	Nta11g20760	-0.59351	0.214268
LysoPS(16:0/0:0)	Nta11g20760	0.850535	0.0318402
Integrifoside C	Nta11g20760	0.825154	0.0431841
3-Deoxyoctulosonic acid	Nta11g20760	0.673539	0.142469
Phenyl salicylate	Nta11g20760	0.861712	0.0273629
5,4'-Dihydroxy-3,3'-dimethoxy-6,7-methylenedioxyflavone 4'-glucuronide	Nta11g20760	0.842155	0.0354064
Regaloside C	Nta11g20760	0.758161	0.0806567
2'-Deoxyuridine	Nta11g20760	0.708846	0.114816
Durantoside III	Nta11g20760	-0.673948	0.142134
Monodictyochrome B	Nta11g20760	0.96061	0.00229685
GlcAbeta1-6Galbeta	Nta11g20760	0.837741	0.0373559
Europine N-oxide	Nta11g20760	-0.632449	0.177813
Isosalicin	Nta11g20760	0.841485	0.0356992
Casearborin B	Nta11g20760	0.610755	0.19778
Demethylalangiside	Nta11g20760	0.890547	0.0173144
Oxyphencyclimine	Nta11g20760	0.933563	0.00647417
2-Keto-D-Gluconic acid	Nta11g20760	0.469016	0.348062
Biotin	Nta11g20760	-0.765812	0.0758439
Spermidine	Nta11g20760	-0.669418	0.145863
Isoedulirin A	Nta11g20760	0.897088	0.0153412
Ganoderic acid I	Nta11g20760	-0.754335	0.0831139
PI(5-iso PGF2VI/18:1(9Z))	Nta11g20760	-0.630314	0.179739
Acetyl-maltose	Nta11g20760	0.626951	0.182791
Longirabdolide G	Nta11g20760	0.919905	0.00936585
1-NBD-decanoyl-2-decanoyl-sn-Glycerol	Nta11g20760	-0.717248	0.10862
Lepidine E	Nta11g20760	-0.532501	0.276746
ROCCELLIC ACID	Nta11g20760	-0.726292	0.102122
2'-hydroxypyridoxol	Nta11g20760	0.66998	0.145398
Irenolone	Nta11g20760	0.587036	0.220596
Indole-3-carboxaldehyde	Nta11g20760	0.662846	0.151347
Psoralenoside	Nta11g20760	-0.539188	0.269595
Flupirtine	Nta11g20760	-0.885588	0.0188863
Epimedoicarisoside A	Nta11g20760	0.638337	0.172548
(+)-Plumosol	Nta11g20760	0.76677	0.0752509
PA(12:0/10:0)	Nta11g20760	0.79977	0.0561242
(S)-Panaxjapyne A	Nta11g20760	-0.817964	0.0466896
1-dodecylglycerone 3-phosphate	Nta11g20760	-0.568752	0.238862
Propyl 1-(propylsulfinyl)propyl disulfide	Nta11g20760	0.792107	0.0603365
Cinncassiol A 19-glucoside	Nta11g20760	0.654874	0.158114
Tetragonolide 2-methylbutyrate	Nta11g20760	0.627861	0.181963
Phaeofuran B	Nta11g20760	-0.641241	0.169975
Dinocton 6	Nta11g20760	0.74971	0.0861277
Ile-Leu-Val-Tyr	Nta11g20760	0.837705	0.0373722
Arnicolide D	Nta11g20760	-0.726539	0.101947
Didrovaltrate acetoxy hydrin	Nta11g20760	0.968436	0.00147871
Lasalocid D	Nta11g20760	-0.796128	0.0581086
formycin b	Nta11g20760	0.90182	0.0139857
Hecogenin	Nta11g20760	0.893093	0.0165329
10,11-dihydro-20-trihydroxy-leukotriene B4	Nta11g20760	0.643974	0.167568
Alternanthin	Nta11g20760	-0.693284	0.126685
Hosenkoside F	Nta11g20760	-0.722604	0.10475
Cibotiumbaroside A	Nta11g20760	0.769957	0.0732928
Sedumoside A5	Nta11g20760	0.68899	0.130049
Poncirin	Nta11g20760	-0.748843	0.086698
S4:18(P3:16/F1:2)	Nta11g20760	0.826458	0.0425619
Actinonin	Nta11g20760	0.595539	0.2123
Mappain	Nta11g20760	-0.591129	0.216586
(+)-Isoclavukerin A	Nta11g20760	0.823614	0.0439244
Indole-3-acetyl-L-glutamic acid	Nta11g20760	0.954452	0.0030647
Brusatol	Nta11g20760	0.858936	0.0284451
6-Hydroxykaempferol 3,6-diglucoside	Nta11g20760	0.467897	0.349372
(-)-Brainic acid	Nta11g20760	0.661531	0.152454
Pacificanone A	Nta11g20760	0.823728	0.0438694
Stellettin J	Nta11g20760	0.670855	0.144676
Ardisiaquinone E	Nta11g20760	-0.631863	0.178342
Inokosterone 20,22-acetonide	Nta11g20760	-0.665716	0.148941
Tehranolide	Nta11g20760	-0.749403	0.0863298
Ambroxide	Nta11g20760	0.905561	0.0129569
Phthalocyanine	Nta11g20760	0.922124	0.00886091
9,9'-O-di-(E)-feruloyl-(-)-secoisolariciresinol	Nta11g20760	0.869686	0.0243663
DL-Ornithino-L-alanine	Nta11g20760	-0.792123	0.0603277
11,17-Dimethyl-5alpha-androstane-11beta,17beta-diol	Nta11g20760	0.843446	0.0348454
beta-Phenylethanol beta-D-rutinoside	Nta11g20760	-0.800614	0.055669
L-phenylalanyl-L-histidine	Nta11g20760	0.463192	0.3549
Pyridinopyrone C1	Nta11g20760	-0.741782	0.0914061
Broussonetine M1	Nta11g20760	-0.732684	0.0976356
Dodecanoic acid	Nta11g20760	0.639732	0.171309
Prooxocryptochine	Nta11g20760	0.785253	0.0642228
Tectoridin	Nta11g20760	0.291995	0.574456
Striatin C	Nta11g20760	0.717558	0.108395
Devenyoside B	Nta11g20760	0.768874	0.0739558
3,11-Dihydroxydodecanoylcarnitine	Nta11g20760	-0.540445	0.268259
6ALPHA-METHYL-11BETA-HYDROXYPROGESTERONE	Nta11g20760	0.913773	0.0108322
Withanoside XI	Nta11g20760	-0.656653	0.156593
Diphenyl(2,4,6-trimethylbenzoyl)phosphine oxide	Nta11g20760	0.76471	0.0765292
18-Demethylparaensidimerin C	Nta11g20760	0.961991	0.00213962
Vasicinone	Nta11g20760	0.863788	0.0265669
Trp Asp Tyr	Nta11g20760	-0.737571	0.0942667
Lemmonin B	Nta11g20760	0.859729	0.028134
3Z,6Z,9Z,18-Nonadecatetraene	Nta11g20760	0.85886	0.0284749
Millewanin B	Nta11g20760	-0.804286	0.0537077
7-Methylcoumarin	Nta11g20760	0.846089	0.03371
Deltonin	Nta11g20760	-0.750762	0.0854381
Aripiprazole	Nta11g20760	-0.86202	0.0272444
Dehydrorobustol A	Nta11g20760	-0.889653	0.0175927
Hydroxy Itraconazole	Nta11g20760	0.658154	0.155314
Methyl pentadecanoate	Nta11g20760	0.772531	0.0717283
Demethoxyencecalin	Nta11g20760	0.883819	0.0194629
3beta-Hydroxypregn-5-en-20-one sulfate	Nta11g20760	-0.848714	0.0325999
Ketazolam	Nta11g20760	0.655053	0.15796
Bruceine D	Nta11g20760	0.836467	0.0379279
LysoPC(18:3(6Z,9Z,12Z)/0:0)	Nta11g20760	-0.776424	0.0693916
Pteroside S	Nta11g20760	0.729403	0.0999273
Icariol A1	Nta11g20760	-0.841818	0.0355532
Heptaethylene glycol	Nta11g20760	0.86068	0.0277631
D-Mannoheptulose	Nta11g20760	0.39242	0.441586
Didanosine	Nta07g24440	-0.884109	0.0193678
Makaluvamine A	Nta07g24440	0.881433	0.0202537
Sedumoside H	Nta07g24440	-0.891499	0.0170202
6-(2-carboxy-6-hydroxyphenoxy)-3,4,5-trihydroxyoxane-2-carboxylic acid	Nta07g24440	-0.917759	0.00986733
PS(14:0(3-OH)/14:0(3-OH))	Nta07g24440	0.731902	0.0981796
Pibocin B	Nta07g24440	0.887582	0.0182465
Kahakamide A	Nta07g24440	-0.912096	0.0112511
Phomamide	Nta07g24440	-0.883064	0.0197117
Norgestimate	Nta07g24440	-0.920108	0.00931917
2,4,6-Trimethyl-1,3,5-trithiane	Nta07g24440	-0.853594	0.0305829
Glaucarubin	Nta07g24440	-0.86753	0.02516
TERNSTROSIDE C	Nta07g24440	0.945187	0.00442443
2-O-Caffeoylglucarate	Nta07g24440	0.91639	0.0101936
Lariciresinol acetate	Nta07g24440	0.94606	0.0042858
2-Hydroxy-3-(beta-D-xylopyranosyloxy)benzoic acid	Nta07g24440	-0.961839	0.00215665
Convallatoxin	Nta07g24440	-0.936034	0.0060067
Xylomollin	Nta07g24440	-0.838642	0.036954
PA(20:4(5Z,8Z,11Z,14Z)/22:6(4Z,7Z,10Z,13E,15E,19Z)-OH(17))	Nta07g24440	0.794538	0.058985
Leucylproline	Nta07g24440	-0.759687	0.0796864
Lamiide	Nta07g24440	0.784948	0.0643982
beta-D-Galactosyl-(1->4)-L-rhamnose	Nta07g24440	-0.795586	0.0584067
Crosatoside B	Nta07g24440	-0.863726	0.0265906
Kanokoside C	Nta07g24440	-0.939498	0.00537993
Nimbolide	Nta07g24440	-0.94635	0.00424029
Dauricoside	Nta07g24440	-0.783884	0.0650121
Epidermin	Nta07g24440	-0.911984	0.0112792
(+)-Ixerin H	Nta07g24440	-0.931769	0.00682446
Jujubasaponin VI	Nta07g24440	0.861311	0.0275182
mannosylglucosylglyceric acid	Nta07g24440	-0.837883	0.0372927
(+)-Ambruticin	Nta07g24440	0.899371	0.0146799
5-Ethyl-3,4-dimethyl-2-furanundecanoic acid	Nta07g24440	-0.854637	0.0301598
(3S,4S)-3-Hydroxytetradecane-1,3,4-tricarboxylate	Nta07g24440	-0.848417	0.0327247
Botcinic acid	Nta07g24440	-0.881878	0.0201052
Kukoamine A	Nta07g24440	-0.824536	0.0434804
N1-(2,4-Dimethoxybenzyl)-n2-(2-(pyridin-2-yl) ethyl)oxalamide	Nta07g24440	-0.821214	0.0450891
5alpha-Androstane-3beta,7alpha,17beta-triol	Nta07g24440	-0.820029	0.0456697
Paeoniflorin	Nta07g24440	0.927639	0.00766477
Leu-Thr-Ser	Nta07g24440	0.994874	3.93521e-05
Bilobalide	Nta07g24440	0.906901	0.0125976
(-)-Simulanol	Nta07g24440	-0.799677	0.0561746
FUMIQUINAZOLINE A	Nta07g24440	-0.647041	0.164885
Coelovirin C	Nta07g24440	-0.839836	0.0364247
Calleryanin	Nta07g24440	-0.764067	0.07693
Isoamoritin	Nta07g24440	0.917332	0.00996859
PGP(10:0/18:0)	Nta07g24440	0.875783	0.0221863
3,5,6,7,2',3',4'-Heptahydroxyflavone	Nta07g24440	-0.806978	0.0522907
Rossicasin A	Nta07g24440	-0.89908	0.0147633
Arzoxifene	Nta07g24440	-0.74065	0.0921714
Ser Glu Glu	Nta07g24440	-0.774508	0.070537
longirostrerone B	Nta07g24440	0.984776	0.0003459
PGP(12:0/14:0)	Nta07g24440	0.765063	0.0763095
Pannellin	Nta07g24440	-0.786126	0.0637214
Paraibanol	Nta07g24440	-0.725485	0.102694
4-Methylgallic acid 3-glucuronide	Nta07g24440	-0.896603	0.0154837
2-trans-O-Feruloylglucaric acid	Nta07g24440	-0.832771	0.0396098
Forskoditerpenoside A	Nta07g24440	-0.662408	0.151715
Loperamide	Nta07g24440	-0.90478	0.0131685
7-hydroxy-L-tryptophan	Nta07g24440	-0.945535	0.00436889
Pyrimethamine	Nta07g24440	-0.740672	0.0921562
Saundersioside D	Nta07g24440	0.743436	0.0902936
Saframycin R	Nta07g24440	0.754014	0.0833216
7-Hydroxy-4H-chromen-4-one	Nta07g24440	-0.911745	0.0113397
Ginkgolide J	Nta07g24440	-0.936667	0.00588952
Lauryl sulfate	Nta07g24440	-0.955182	0.00296796
Riboflavin	Nta07g24440	0.880269	0.0206451
(+)-Hydroxypinoresinol 4,4'-di-O-beta-D-glucopyranoside	Nta07g24440	0.754956	0.0827127
Speradine G	Nta07g24440	-0.840322	0.03621
Asiaticoside B	Nta07g24440	-0.736529	0.0949808
2,4-Divinylprotochlorophyllide	Nta07g24440	-0.812145	0.0496197
Cistanoside F	Nta07g24440	0.757458	0.0811061
His-Trp	Nta07g24440	-0.719847	0.106735
4-Hydroxyphenylacetylglutamic acid	Nta07g24440	0.913251	0.0109618
Fraxinellone	Nta07g24440	0.91029	0.0117107
Tamynine	Nta07g24440	-0.891232	0.0171023
Licofelone	Nta07g24440	-0.828199	0.041738
Canrenone	Nta07g24440	0.84155	0.0356704
Tenuiphenone B	Nta07g24440	-0.785555	0.0640493
PILOCARPINE	Nta07g24440	-0.720742	0.106089
Pyroglutamyl-3-methylhistidyl-prolinamide	Nta07g24440	0.719227	0.107183
Ajubractin D	Nta07g24440	0.935246	0.00615387
Hesperetin	Nta07g24440	0.943143	0.00475722
N-acetyl tyramine	Nta07g24440	-0.719972	0.106644
Dide-O-methylsimmondsin	Nta07g24440	-0.880751	0.0204825
Globulusin A	Nta07g24440	-0.906543	0.0126932
L-isoleucyl-L-proline	Nta07g24440	-0.72783	0.101034
Artoindonesianin P	Nta07g24440	-0.976148	0.000846576
Trungapeptin A	Nta07g24440	0.796522	0.0578927
Perseanol	Nta07g24440	-0.836532	0.0378988
Pyranomammea B	Nta07g24440	-0.895313	0.0158653
Amritoside A	Nta07g24440	-0.938614	0.00553664
N-trans-Feruloyltyramine	Nta07g24440	-0.880327	0.0206254
Sachalinoside A	Nta07g24440	-0.752011	0.0846225
Cyclo(4-hydroxy-R-Pro-S-Leu)	Nta07g24440	-0.763249	0.0774418
Lawinal	Nta07g24440	-0.723693	0.103971
15-epi-Sibiricinone D	Nta07g24440	-0.802012	0.0549185
Fenbufen	Nta07g24440	-0.738628	0.093545
Guanosine	Nta07g24440	-0.877145	0.0217128
Azaperone	Nta07g24440	0.779585	0.0675201
D-Myoinositol 4-phosphate	Nta07g24440	-0.792827	0.0599351
Phe Trp Ser	Nta07g24440	-0.757638	0.0809912
PA(18:3(6Z,9Z,12Z)/20:5(7Z,9Z,11E,13E,17Z)-3OH(5,6,15))	Nta07g24440	0.888404	0.0179857
Diplotasin	Nta07g24440	-0.718303	0.107853
PGP(i-22:0/20:3(8Z,11Z,14Z)-2OH(5,6))	Nta07g24440	0.938289	0.00559483
4,5-Dihydromelampodin B	Nta07g24440	0.790948	0.060986
4-(2-amino-3-hydroxyphenyl)-4-oxobutanoic acid O-glucoside	Nta07g24440	-0.645225	0.166471
Soyasaponin Ba	Nta07g24440	0.763262	0.0774333
Ficiolide I	Nta07g24440	-0.944932	0.00446516
Bistratamide J	Nta07g24440	0.833096	0.0394608
Niga-ichigoside F1	Nta07g24440	0.711902	0.112544
Prenylcandidusin B	Nta07g24440	-0.920229	0.00929124
7-deacetyl-7-benzoylepoxyazadiradione	Nta07g24440	0.880639	0.0205203
(R)-1-O-b-D-glucopyranosyl-1,3-octanediol	Nta07g24440	0.937375	0.00576003
11beta-Hydroxycurvularin	Nta07g24440	0.850814	0.0317245
Malonyldaidzin	Nta07g24440	0.810134	0.0506512
Quercetin 3-rhamnosyl-(1->6)-glucosyl-(1->6)-galactoside	Nta07g24440	-0.80255	0.0546307
Triandrin	Nta07g24440	0.855085	0.029979
3,5,6-Trihydroxy-5-(hydroxymethyl)-2-methoxy-2-cyclohexen-1-one	Nta07g24440	-0.888883	0.0178346
Benzyl beta-primeveroside	Nta07g24440	-0.791767	0.0605268
Deoxygaudichaudione A	Nta07g24440	0.980801	0.000549352
Mucronulatol-(4->5')-vestitol	Nta07g24440	-0.954002	0.00312503
Callophycoic acid G	Nta07g24440	-0.808518	0.0514875
Coriose	Nta07g24440	-0.898331	0.0149794
Ilekudinoside K	Nta07g24440	0.830171	0.0408136
Isohernandezine	Nta07g24440	-0.817847	0.0467477
Saccharumoside A	Nta07g24440	-0.702949	0.119253
Iristectorin B	Nta07g24440	-0.822115	0.0446502
Revandchinone 3	Nta07g24440	0.726222	0.102171
Pristanic acid	Nta07g24440	-0.879655	0.020853
Cinnamoyl putrescin	Nta07g24440	0.894723	0.0160414
Alangiobussinine	Nta07g24440	0.912414	0.0111711
N-Benzyloxycarbonylglycine	Nta07g24440	-0.64097	0.170214
5-O-Methylvisammioside	Nta07g24440	-0.76383	0.0770778
Antibiotic VM 44857	Nta07g24440	-0.794681	0.0589062
Briarellin N	Nta07g24440	-0.750886	0.0853566
Platenolide II	Nta07g24440	-0.818323	0.0465117
4-(beta-D-glucosyloxy)-3-hydroxy-benzoic acid	Nta07g24440	-0.90997	0.0117932
Swietenin B	Nta07g24440	0.815841	0.0477489
Morusimic acid C	Nta07g24440	0.948228	0.00395112
Liensinine	Nta07g24440	-0.709314	0.114466
N-Acetyl-b-glucosaminylamine	Nta07g24440	-0.885484	0.0189199
Delavayin B	Nta07g24440	-0.672233	0.143541
Isokuraramine	Nta07g24440	-0.790144	0.0614382
Cyclopiazonic acid	Nta07g24440	-0.894733	0.0160385
Tuberonic acid glucoside	Nta07g24440	-0.762511	0.077904
Murrastifoline B	Nta07g24440	0.872387	0.0233886
7-DESHYDROXYPYROGALLIN-4-CARBOXYLIC ACID	Nta07g24440	-0.753135	0.0838913
2,3,4,5,2',6'-Hexamethoxy-3',4'-methylenedioxychalcone	Nta07g24440	0.833129	0.0394457
Ma'eganedin A	Nta07g24440	0.833205	0.0394109
Neuraminic acid	Nta07g24440	-0.882314	0.0199601
guanine	Nta07g24440	-0.629835	0.180172
Zeanoside B	Nta07g24440	-0.962756	0.00205485
Sucutinirane D	Nta07g24440	0.921501	0.00900131
Arotinoid acid	Nta07g24440	0.837274	0.0375651
hypothemycin	Nta07g24440	0.744112	0.0898404
4-Hydroxyestrone	Nta07g24440	0.88765	0.0182247
1-(13Z,16Z-docosadienoyl)-glycero-3-phosphate	Nta07g24440	-0.872373	0.0233937
p-hydroxybenzoyl glucose	Nta07g24440	-0.761459	0.078566
N,N-Dihydroxy-L-tryptophan	Nta07g24440	-0.957078	0.00272395
Rhyncoside D	Nta07g24440	-0.98809	0.000211926
trans-Aconitic acid	Nta07g24440	0.758913	0.0801779
Tricalysioside R	Nta07g24440	-0.764773	0.0764901
Decarbomethoxykopsifine	Nta07g24440	0.719583	0.106925
Ethyl gallate 4-glucuronide	Nta07g24440	-0.746862	0.0880076
Vinaginsenoside R12	Nta07g24440	-0.750803	0.085411
N-trans-p-coumaroyloctopamine	Nta07g24440	-0.902564	0.0137781
Miglustat	Nta07g24440	0.899428	0.0146636
Cytidine-3'-monophosphate	Nta07g24440	-0.77842	0.0682071
Artemisinin	Nta07g24440	0.857198	0.0291327
Bisphenol S	Nta07g24440	-0.838948	0.036818
Physalolactone B 3-glucoside	Nta07g24440	0.652719	0.159965
Notopterol	Nta07g24440	0.759911	0.0795443
Ingenol	Nta07g24440	-0.75687	0.0814823
Integerrimide B	Nta07g24440	0.883231	0.0196564
LysoPA(i-20:0/0:0)	Nta07g24440	-0.722427	0.104877
Xylaroside B	Nta07g24440	0.688147	0.130714
16alpha-Fluoroestradiol	Nta07g24440	0.865182	0.0260384
Angeloside	Nta07g24440	0.729101	0.10014
PA(20:4(8Z,11Z,14Z,17Z)/20:3(6,8,11)-OH(5))	Nta07g24440	0.552052	0.256044
Corchoionoside B	Nta07g24440	0.872566	0.0233244
Herbimycin B	Nta07g24440	0.968808	0.00144423
Forskoditerpenoside D	Nta07g24440	-0.768303	0.0743062
Abyssinoflavanone IV	Nta07g24440	-0.918548	0.0096814
D-Fructofuranose 1,2':2,3'-dianhydride	Nta07g24440	-0.930675	0.00704236
Phytolaccagenin	Nta07g24440	0.670979	0.144573
Methohexital	Nta07g24440	0.734103	0.0966519
Botryoloic acid	Nta07g24440	-0.649459	0.162782
Bidenoside C	Nta07g24440	0.757335	0.0811846
Sordarin-1-glucose ester	Nta07g24440	-0.828494	0.0415991
Jasmonic acid	Nta07g24440	0.875502	0.0222847
Tiegusanin M	Nta07g24440	0.854461	0.0302312
Methyl camaralate	Nta07g24440	0.735935	0.0953886
20-Deoxyingenol	Nta07g24440	-0.670848	0.144681
PI(PGE2/16:1(9Z))	Nta07g24440	0.802137	0.0548515
Lactobionic acid	Nta07g24440	-0.833229	0.0393996
Polanrazine D	Nta07g24440	-0.850263	0.0319529
4-(2-Methoxyphenyl)-2-((5-methyl-1H-imidazol-4-yl)methyl)thiazole	Nta07g24440	-0.901184	0.0141644
11-Beta-hydroxyandrostenedione	Nta07g24440	0.803002	0.0543896
Leu-Ala-Asp	Nta07g24440	0.916339	0.0102059
Aferoside C	Nta07g24440	-0.688514	0.130425
Cys-Phe-Phe-Gly	Nta07g24440	-0.693871	0.126228
Antanapeptin D	Nta07g24440	0.698471	0.122672
12-hydroxyheptadecanoic acid	Nta07g24440	-0.86067	0.0277667
PE(LTE4/22:4(7Z,10Z,13Z,16Z))	Nta07g24440	0.736052	0.0953085
PA(20:5(7Z,9Z,11E,13E,17Z)-3OH(5,6,15)/14:1(9Z))	Nta07g24440	0.661061	0.152851
Decahydrogambogic Acid	Nta07g24440	0.722862	0.104566
Androstene group	Nta07g24440	-0.800189	0.055898
N-Acetyl-alpha-D-glucosamine 1-phosphate	Nta07g24440	-0.812916	0.0492265
1-Hydroxy-4-oxahomoadamantan-5-one	Nta07g24440	0.826827	0.0423868
N-Ac-Tyr-Val-Ala-Asp-CHO	Nta07g24440	-0.902556	0.0137803
Caffeine, 8-((3-methoxypropyl)amino)-	Nta07g24440	0.710445	0.113625
Prostaglandin D2	Nta07g24440	-0.91013	0.0117519
Platanionoside G	Nta07g24440	0.795185	0.0586278
Striatisporin A	Nta07g24440	0.620513	0.18869
Simplexin B	Nta07g24440	-0.827326	0.0421503
Obyanamide	Nta07g24440	0.805145	0.0532533
13-Hydroxydocosanoic acid	Nta07g24440	-0.832755	0.0396175
Sorocein B	Nta07g24440	-0.587664	0.219979
Hydnocarpic acid	Nta07g24440	-0.795226	0.0586054
(S)-9-Hydroxy-10-undecenoic acid	Nta07g24440	0.711009	0.113206
Linagliptin	Nta07g24440	-0.813296	0.0490337
Nudicaulidine	Nta07g24440	0.844242	0.0345014
Cocsilinine	Nta07g24440	-0.958842	0.00250616
Virolanol C	Nta07g24440	-0.927132	0.00777122
1-O-ethyl-N-acetyl-beta-D-glucosamine	Nta07g24440	0.809028	0.0512231
Xanthone	Nta07g24440	-0.823091	0.0441769
Prosapogenin A	Nta07g24440	0.740534	0.0922498
Elephanoside A	Nta07g24440	-0.713698	0.11122
PGP(17:0cycw7/15:0cycw5)	Nta07g24440	0.906454	0.012717
4-Geranyl-3,4',5-trihydroxystilbene	Nta07g24440	0.814739	0.0483034
bipinnatone A	Nta07g24440	-0.75457	0.0829622
Racemosic acid	Nta07g24440	-0.601387	0.20667
Discarine F	Nta07g24440	-0.760373	0.079252
R(+)-2-(heptan-3-yl)quinazolin-4(3H)-one	Nta07g24440	0.831764	0.0400742
hesperadin	Nta07g24440	-0.82613	0.042718
Phenylacetaldehyde	Nta07g24440	-0.574862	0.232694
2-O-p-Coumaroyltartronic acid	Nta07g24440	-0.819182	0.0460867
Tetranor-12R-HETE	Nta07g24440	0.789322	0.0619025
Lys-Asp-Tyr	Nta07g24440	0.886864	0.0184757
Boschniaside	Nta07g24440	0.816315	0.0475116
Goralatide	Nta07g24440	-0.604491	0.203707
Graviphane	Nta07g24440	-0.807789	0.051867
Beta-Zearalanol	Nta07g24440	0.767643	0.074712
LPA(0:0/15:0)	Nta07g24440	-0.918608	0.00966728
Isotachioside	Nta07g24440	-0.817392	0.046974
Forsythoside E	Nta07g24440	-0.669131	0.146101
Heteroplexisolide E	Nta07g24440	0.734165	0.0966092
Kadlongilactone E	Nta07g24440	0.967056	0.0016101
Heptadecanoic acid	Nta07g24440	-0.694281	0.125909
Micromelone B	Nta07g24440	-0.839566	0.036544
Euperfolitin	Nta07g24440	-0.801025	0.0554477
O-Methylovaliflavanone C	Nta07g24440	-0.749864	0.0860267
H-TRP-TRP-OH	Nta07g24440	-0.833649	0.0392074
Prednisolone	Nta07g24440	-0.814193	0.0485791
Magnesium protoporphyrin	Nta07g24440	-0.862136	0.0271994
Nummularine F	Nta07g24440	-0.717428	0.108489
Lys Trp Lys	Nta07g24440	-0.909901	0.0118109
Kamalachalcone A	Nta07g24440	-0.741006	0.0919306
Kanosamine 6-phosphate	Nta07g24440	-0.642228	0.169104
3-O-Acetylniduloic acid	Nta07g24440	-0.715842	0.109647
H-Met-Asp-OH	Nta07g24440	-0.682145	0.135491
(E)-2-Methylgeranyl diphosphate	Nta07g24440	-0.705971	0.11697
Lansoprazole sulfone	Nta07g24440	-0.811128	0.05014
3-Hydroxyisovaleric acid	Nta07g24440	-0.837802	0.0373289
16alpha,17alpha-Dihydroxyprogesterone acetophenide	Nta07g24440	-0.985456	0.000315774
Heleurine N-oxide	Nta07g24440	0.81214	0.049622
Cephalezomine J	Nta07g24440	-0.897956	0.0150882
Rhodojaponin III	Nta07g24440	-0.78481	0.0644775
Cimigenoside	Nta07g24440	0.865491	0.0259222
Isoalangiside	Nta07g24440	-0.674407	0.141758
Wahlenoside A	Nta07g24440	0.498752	0.313905
Dimethoxyscytonemin	Nta07g24440	-0.845832	0.0338194
N-(beta-D-glucosyl)nicotinate	Nta07g24440	-0.769251	0.0737247
Denchryside A	Nta07g24440	0.832796	0.0395987
Amoritin	Nta07g24440	0.926101	0.00798974
(1S,2S)-3-Oxo-2[(2Z)-pentenyl]cyclopentane-1-butyric acid	Nta07g24440	-0.626352	0.183336
Phlomiol	Nta07g24440	0.770764	0.0728003
Rapanone	Nta07g24440	-0.81685	0.0472441
4'-Demethylpodophyllotoxin	Nta07g24440	-0.687867	0.130936
Trifochalcanoloside I	Nta07g24440	0.899994	0.0145016
Gniditrin	Nta07g24440	-0.833239	0.0393952
Vinpocetine	Nta07g24440	-0.813941	0.0487066
Suspensoside B	Nta07g24440	0.748093	0.0871929
Proscillaridin A	Nta07g24440	0.846417	0.0335704
Kukoamine B	Nta07g24440	0.804117	0.053797
10-Phenyl-[12]-cytochalasins Z16	Nta07g24440	-0.614687	0.194096
(-)-Tetrazomine	Nta07g24440	-0.851296	0.031525
cis-10-Pentadecenoic acid	Nta07g24440	0.812726	0.0493235
Terragine D	Nta07g24440	-0.704638	0.117974
N,N-Dimethylaniline N-oxide	Nta07g24440	-0.521295	0.288889
Vardenafil	Nta07g24440	-0.73599	0.0953509
Estriol	Nta07g24440	-0.63622	0.174434
Piscerisoflavone E	Nta07g24440	0.671995	0.143736
Vomifoliol 9-[glucosyl-(1->4)-xylosyl-(1->6)-glucoside]	Nta07g24440	-0.61469	0.194093
S4:16(P3:14/F1:2)	Nta07g24440	-0.776004	0.0696417
Broussonetine S	Nta07g24440	0.859541	0.0282074
PA(18:2(9Z,11Z)/TXB2)	Nta07g24440	0.743118	0.0905067
D-glycero-L-galacto-Octulose	Nta07g24440	-0.69409	0.126057
Sesamoside	Nta07g24440	0.639955	0.171112
Galbelgin	Nta07g24440	-0.648943	0.163229
Catalposide	Nta07g24440	0.801294	0.0553034
Paradol	Nta07g24440	0.864866	0.0261578
Reticuline N-oxide	Nta07g24440	-0.766193	0.0756081
Glochidionolactone A	Nta07g24440	-0.883459	0.0195812
Salidroside	Nta07g24440	-0.867526	0.0251617
3-o-acetylbotcineric acid	Nta07g24440	-0.915717	0.0103561
3-Hydroxyheptanoylcarnitine	Nta07g24440	0.692928	0.126962
N-(1-Deoxy-1-fructosyl)alanine	Nta07g24440	-0.890345	0.017377
1-O-Methylisobractatin	Nta07g24440	0.892513	0.0167093
Perilloside A	Nta07g24440	0.758258	0.0805951
Anemarsaponin E	Nta07g24440	0.723306	0.104248
N-cis-Feruloyldopamine	Nta07g24440	-0.812353	0.0495132
Met Val Arg	Nta07g24440	-0.756197	0.0819138
Gibberellin A52	Nta07g24440	0.785407	0.0641343
N-Acetyl-L-aspartic acid	Nta07g24440	-0.589218	0.218455
Carnosol	Nta07g24440	0.768656	0.0740894
Folinic acid	Nta07g24440	-0.663976	0.150398
Filipin III	Nta07g24440	-0.661967	0.152086
Avermectin A1b monosaccharide	Nta07g24440	0.90891	0.0120682
Jerantinine H	Nta07g24440	0.935866	0.00603788
Paeonenoide A	Nta07g24440	0.85538	0.0298599
Foliasalacioside D	Nta07g24440	-0.716618	0.10908
Aspernolide A	Nta07g24440	-0.613938	0.194796
verminoside	Nta07g24440	-0.880923	0.0204249
Dolichyl b-D-glucosyl phosphate	Nta07g24440	-0.684359	0.13372
2,3-Didehydrocinnzeylanone	Nta07g24440	0.687922	0.130892
PGP(16:0/16:1(9Z))	Nta07g24440	0.554494	0.253503
Anisomycin	Nta07g24440	0.853432	0.0306491
Atractyloside I	Nta07g24440	-0.812993	0.0491877
Sauvagnine	Nta07g24440	0.629231	0.18072
Tryptoquivaline E	Nta07g24440	-0.75039	0.0856815
Dendroside A	Nta07g24440	-0.703095	0.119142
Epoxypheophorbide a	Nta07g24440	0.848916	0.0325151
Alnespirone	Nta07g24440	0.794959	0.0587527
Glicophenone	Nta07g24440	0.831948	0.0399892
3-Hydroxyhept-4-enoylcarnitine	Nta07g24440	0.62517	0.184415
Hypoloside A	Nta07g24440	-0.887461	0.018285
Xylarenone D	Nta07g24440	-0.636068	0.174569
Ulmicin D	Nta07g24440	0.65986	0.153866
Dendronobiloside B	Nta07g24440	-0.679238	0.137831
4-Methyl-3-oxoadipate	Nta07g24440	0.920383	0.00925587
PGP(18:0/16:1(9Z))	Nta07g24440	0.753905	0.083392
Triflorestevione	Nta07g24440	0.88617	0.0186986
Skimmin	Nta07g24440	-0.736649	0.0948983
Tyr Gln Phe	Nta07g24440	-0.79948	0.0562813
Rollicosin	Nta07g24440	-0.60039	0.207625
8,10-Dihydroxy-2,6,10-trimethyl-2,6,11-dodecatrien-4-one	Nta07g24440	-0.867745	0.0250803
N-p-trans-Coumaroyltyramine	Nta07g24440	-0.706833	0.116322
GMP	Nta07g24440	-0.819524	0.045918
(-)-Pereniporin A	Nta07g24440	-0.760393	0.079239
dehydrohistidyltryptophyldiketopiperazine	Nta07g24440	-0.871497	0.0237084
Ritonavir	Nta07g24440	-0.845861	0.0338073
Dolastatin 16	Nta07g24440	0.811413	0.0499941
Harunmadagascarin D	Nta07g24440	-0.839302	0.0366606
Scutellarein 7,4'-dimethyl ether 6-xylosyl-(1->2)-glucoside	Nta07g24440	-0.612994	0.195679
Semilepidinoside A	Nta07g24440	-0.762124	0.0781473
isorhamnetin 3-rutinoside-7-glucoside	Nta07g24440	0.843869	0.0346624
Glochidionolactone F	Nta07g24440	-0.918276	0.00974524
Fraxin	Nta07g24440	-0.906892	0.0125999
3-(3,4-Dihydroxyphenyl)lactic acid	Nta07g24440	-0.933371	0.00651119
Galacturonic acid	Nta07g24440	-0.608132	0.200253
Polyneuridine-N-oxide	Nta07g24440	0.812065	0.0496603
Arachidonic acid	Nta07g24440	-0.723293	0.104257
Biotin sulfoxide	Nta07g24440	-0.437107	0.386097
PE-NMe(16:1(9Z)/15:0)	Nta07g24440	-0.878671	0.0211882
beta-Kudinlactone	Nta07g24440	-0.543353	0.265178
N1,N8-Bis(4-coumaroyl)spermidine	Nta07g24440	0.790186	0.0614147
Icariside A5	Nta07g24440	-0.71683	0.108925
axinastatin 3	Nta07g24440	0.738553	0.0935966
Ilekudinoside P	Nta07g24440	0.764676	0.0765504
alpha-Hederin	Nta07g24440	-0.643186	0.16826
2,7-Di-tert-butyl-9-fluorenylmethyl chloroformate	Nta07g24440	0.819332	0.0460128
(+-)-5-(1-Methylethyl)-2-(2-methylpropyl)-2-cyclohexen-1-one	Nta07g24440	-0.7657	0.0759135
Asticolorin A	Nta07g24440	-0.816899	0.0472198
Tragopogonoside A	Nta07g24440	0.745088	0.089188
Bacopaside IV	Nta07g24440	0.821205	0.0450938
Indolelactic acid	Nta07g24440	-0.536901	0.272033
Avermectin B1a aglycone	Nta07g24440	-0.650136	0.162194
PA(a-13:0/22:6(4Z,7Z,10Z,13E,15E,19Z)-OH(17))	Nta07g24440	0.617365	0.191603
26-Glucosyl-1,3,11,22-tetrahydroxyergosta-5,24-dien-26-oate	Nta07g24440	0.759932	0.0795312
julocrotine	Nta07g24440	0.708396	0.115151
8-MeSO-octyl-CN	Nta07g24440	0.849431	0.0322996
6-Desacetylscilliroside	Nta07g24440	0.905195	0.0130559
Botryaloic acid	Nta07g24440	0.807345	0.0520985
Indoleacrylic acid	Nta07g24440	-0.534274	0.274843
1,5-Dimethylbarbituric acid	Nta07g24440	-0.485844	0.328574
Bakankoside	Nta07g24440	-0.824733	0.0433856
2,4-diacetylphloroglucinol	Nta07g24440	0.626812	0.182917
Microtoenin A	Nta07g24440	0.813153	0.0491061
Cussovantoside C	Nta07g24440	0.928841	0.00741529
Methyl 8-[3-(2-hydroxyoctyl)oxiran-2-yl]octanoate	Nta07g24440	-0.694284	0.125907
(+)-Isotrilobine	Nta07g24440	0.951272	0.00350372
Compound II(R/S)	Nta07g24440	-0.632311	0.177938
2-(2,4-Dichloro-phenoxy)-N-(2-mercapto-ethyl)-acetamide	Nta07g24440	0.547823	0.260469
PI(20:4(5Z,8Z,11Z,14Z)/PGF2alpha)	Nta07g24440	0.805968	0.0528202
10-Methoxycamptothecin	Nta07g24440	0.617589	0.191396
LysoPS(16:0/0:0)	Nta07g24440	-0.779978	0.067289
Integrifoside C	Nta07g24440	-0.633736	0.176657
3-Deoxyoctulosonic acid	Nta07g24440	-0.623443	0.185996
Phenyl salicylate	Nta07g24440	-0.812124	0.0496302
5,4'-Dihydroxy-3,3'-dimethoxy-6,7-methylenedioxyflavone 4'-glucuronide	Nta07g24440	-0.760839	0.078957
Regaloside C	Nta07g24440	-0.875539	0.0222717
2'-Deoxyuridine	Nta07g24440	-0.721476	0.10556
Durantoside III	Nta07g24440	0.509348	0.302049
Monodictyochrome B	Nta07g24440	-0.883226	0.0196582
GlcAbeta1-6Galbeta	Nta07g24440	-0.873672	0.0229302
Europine N-oxide	Nta07g24440	0.723111	0.104387
Isosalicin	Nta07g24440	-0.642422	0.168933
Casearborin B	Nta07g24440	-0.523288	0.286714
Demethylalangiside	Nta07g24440	-0.694682	0.125598
Oxyphencyclimine	Nta07g24440	-0.983878	0.000387793
2-Keto-D-Gluconic acid	Nta07g24440	-0.438083	0.384914
Biotin	Nta07g24440	0.878608	0.0212097
Spermidine	Nta07g24440	0.714987	0.110273
Isoedulirin A	Nta07g24440	-0.814726	0.0483097
Ganoderic acid I	Nta07g24440	0.786334	0.0636022
PI(5-iso PGF2VI/18:1(9Z))	Nta07g24440	0.67598	0.140475
Acetyl-maltose	Nta07g24440	-0.639096	0.171873
Longirabdolide G	Nta07g24440	-0.904411	0.0132691
1-NBD-decanoyl-2-decanoyl-sn-Glycerol	Nta07g24440	0.83741	0.0375043
Lepidine E	Nta07g24440	0.710113	0.113872
ROCCELLIC ACID	Nta07g24440	0.526429	0.2833
2'-hydroxypyridoxol	Nta07g24440	-0.778416	0.0682094
Irenolone	Nta07g24440	-0.599095	0.20887
Indole-3-carboxaldehyde	Nta07g24440	-0.546278	0.262093
Psoralenoside	Nta07g24440	0.730181	0.0993815
Flupirtine	Nta07g24440	0.847172	0.03325
Epimedoicarisoside A	Nta07g24440	-0.728938	0.100254
(+)-Plumosol	Nta07g24440	-0.649548	0.162704
PA(12:0/10:0)	Nta07g24440	-0.853161	0.0307595
(S)-Panaxjapyne A	Nta07g24440	0.920093	0.00932256
1-dodecylglycerone 3-phosphate	Nta07g24440	0.704646	0.117969
Propyl 1-(propylsulfinyl)propyl disulfide	Nta07g24440	-0.580484	0.227075
Cinncassiol A 19-glucoside	Nta07g24440	-0.686151	0.132295
Tetragonolide 2-methylbutyrate	Nta07g24440	-0.527762	0.281857
Phaeofuran B	Nta07g24440	0.70329	0.118994
Dinocton 6	Nta07g24440	-0.770422	0.0730087
Ile-Leu-Val-Tyr	Nta07g24440	-0.711959	0.112502
Arnicolide D	Nta07g24440	0.816886	0.0472264
Didrovaltrate acetoxy hydrin	Nta07g24440	-0.884656	0.0191891
Lasalocid D	Nta07g24440	0.862904	0.0269046
formycin b	Nta07g24440	-0.859369	0.0282748
Hecogenin	Nta07g24440	-0.831781	0.0400663
10,11-dihydro-20-trihydroxy-leukotriene B4	Nta07g24440	-0.596296	0.211569
Alternanthin	Nta07g24440	0.824436	0.0435285
Hosenkoside F	Nta07g24440	0.68456	0.13356
Cibotiumbaroside A	Nta07g24440	-0.854547	0.0301963
Sedumoside A5	Nta07g24440	-0.578472	0.229079
Poncirin	Nta07g24440	0.709229	0.114529
S4:18(P3:16/F1:2)	Nta07g24440	-0.760924	0.0789036
Actinonin	Nta07g24440	-0.649933	0.16237
Mappain	Nta07g24440	0.737573	0.0942655
(+)-Isoclavukerin A	Nta07g24440	-0.770178	0.073158
Indole-3-acetyl-L-glutamic acid	Nta07g24440	-0.818773	0.0462886
Brusatol	Nta07g24440	-0.816214	0.0475622
6-Hydroxykaempferol 3,6-diglucoside	Nta07g24440	-0.575577	0.231976
(-)-Brainic acid	Nta07g24440	-0.466587	0.350908
Pacificanone A	Nta07g24440	-0.765655	0.0759415
Stellettin J	Nta07g24440	-0.623988	0.185497
Ardisiaquinone E	Nta07g24440	0.771837	0.0721488
Inokosterone 20,22-acetonide	Nta07g24440	0.789127	0.0620127
Tehranolide	Nta07g24440	0.79607	0.0581406
Ambroxide	Nta07g24440	-0.925222	0.00817861
Phthalocyanine	Nta07g24440	-0.91013	0.0117521
9,9'-O-di-(E)-feruloyl-(-)-secoisolariciresinol	Nta07g24440	-0.815339	0.048001
DL-Ornithino-L-alanine	Nta07g24440	0.698035	0.123007
11,17-Dimethyl-5alpha-androstane-11beta,17beta-diol	Nta07g24440	-0.818096	0.0466239
beta-Phenylethanol beta-D-rutinoside	Nta07g24440	0.89961	0.0146114
L-phenylalanyl-L-histidine	Nta07g24440	-0.54226	0.266335
Pyridinopyrone C1	Nta07g24440	0.679833	0.137351
Broussonetine M1	Nta07g24440	0.794153	0.0591985
Dodecanoic acid	Nta07g24440	-0.760772	0.0789993
Prooxocryptochine	Nta07g24440	-0.755391	0.0824323
Tectoridin	Nta07g24440	-0.355065	0.489784
Striatin C	Nta07g24440	-0.665736	0.148925
Devenyoside B	Nta07g24440	-0.58501	0.222591
3,11-Dihydroxydodecanoylcarnitine	Nta07g24440	0.756625	0.0816391
6ALPHA-METHYL-11BETA-HYDROXYPROGESTERONE	Nta07g24440	-0.80351	0.0541194
Withanoside XI	Nta07g24440	0.787268	0.0630689
Diphenyl(2,4,6-trimethylbenzoyl)phosphine oxide	Nta07g24440	-0.765017	0.0763378
18-Demethylparaensidimerin C	Nta07g24440	-0.895878	0.0156977
Vasicinone	Nta07g24440	-0.928634	0.00745797
Trp Asp Tyr	Nta07g24440	0.74491	0.0893071
Lemmonin B	Nta07g24440	-0.689927	0.129312
3Z,6Z,9Z,18-Nonadecatetraene	Nta07g24440	-0.82476	0.0433726
Millewanin B	Nta07g24440	0.886723	0.0185206
7-Methylcoumarin	Nta07g24440	-0.676421	0.140115
Deltonin	Nta07g24440	0.695216	0.125184
Aripiprazole	Nta07g24440	0.93889	0.0054875
Dehydrorobustol A	Nta07g24440	0.839138	0.0367338
Hydroxy Itraconazole	Nta07g24440	-0.518159	0.292321
Methyl pentadecanoate	Nta07g24440	-0.579016	0.228536
Demethoxyencecalin	Nta07g24440	-0.931129	0.00695144
3beta-Hydroxypregn-5-en-20-one sulfate	Nta07g24440	0.759623	0.0797268
Ketazolam	Nta07g24440	-0.83202	0.0399561
Bruceine D	Nta07g24440	-0.839404	0.0366155
LysoPC(18:3(6Z,9Z,12Z)/0:0)	Nta07g24440	0.812703	0.049335
Pteroside S	Nta07g24440	-0.559372	0.248455
Icariol A1	Nta07g24440	0.948575	0.00389876
[truncated: 248,002+ more rows]
